# Supplementary material
Source: PubMed Central journal article supplement (PMC6615566)
Supplement: NIHMS1020169-supplement-Suppl.pdf [file NIHMS1020169-supplement-Suppl.pdf]

## Supporting Information

### **Organocatalytic Decarboxylative Cyanomethylation of Difluoromethyl and Trifluoromethyl Ketones**

Kaluvu Balaraman, Max Moskowitz and Christian Wolf\*

Georgetown University, Chemistry Department, Washington, DC, USA.

*Email: cw27@georgetown.edu*

### Table of Contents

| <b>Description</b>                                                                         | <b>Page No.</b> |
|--------------------------------------------------------------------------------------------|-----------------|
| 1. General information                                                                     | 2               |
| 2. Cyanomethylation optimization                                                           | 3               |
| 2.1. Catalyst screening                                                                    | 3               |
| 2.2. Solvent and temperature optimization                                                  | 4               |
| 3. Synthetic methods and compound characterization                                         | 5               |
| 3.1. General procedure for the cyanomethylation of trifluoromethyl ketones                 | 5               |
| 3.2. Gram scale synthesis of 4,4,4-trifluoro-3-hydroxy-3-phenylbutanenitrile ( <b>3a</b> ) | 12              |
| 3.3. General procedure for the cyanomethylation of difluoromethyl ketones                  | 12              |
| 4. <sup>1</sup> H, <sup>13</sup> C and <sup>19</sup> F NMR spectra                         | 18              |
| 5. Crystallographic data                                                                   | 54              |
| 6. References                                                                              | 58              |

## 1. General Information

Commercially available trifluoromethyl ketones (**1a-1n**), difluoromethyl ketone (**4a**), chlorodifluoromethyl ketone (**6**), cyanoacetic acid (**2**), reagents, catalysts and solvents were used as purchased without further purification. Difluoromethyl ketones (**4b-4h**)<sup>1</sup> and *tert*-butylsulfinyl imide **8** were synthesized by following literature procedures.<sup>2</sup> The reaction between **1a** and ethyl malonic acid gave compound **11** which is reported in the literature.<sup>3</sup> NMR spectra were obtained at 400 MHz (<sup>1</sup>H NMR), 376 MHz (<sup>19</sup>F NMR) and 100 MHz (<sup>13</sup>C NMR) in deuterated solvents. Reaction products were purified by column chromatography on silica gel (particle size 40-63 μm) as described below.

## 2. Cyanomethylation optimization

### 2.1. Catalyst screening<sup>a</sup>

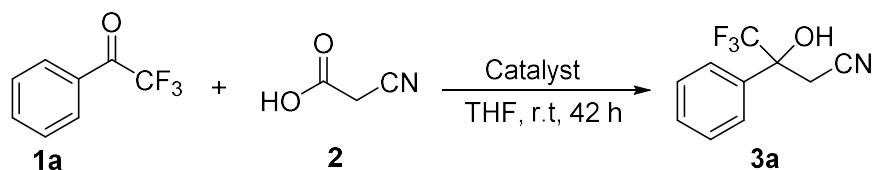

| entry | catalyst                        | catalyst mol% | solvent | time (h) | temp (°C) | yield (%) <sup>b</sup> |
|-------|---------------------------------|---------------|---------|----------|-----------|------------------------|
| 1     | DBU                             | 50            | THF     | 42       | 25        | 49                     |
| 2     | No base                         | --            | THF     | 42       | 25        | nr                     |
| 3     | Et <sub>3</sub> N               | 50            | THF     | 42       | 25        | 45                     |
| 4     | DIPEA                           | 50            | THF     | 42       | 25        | 29                     |
| 5     | DABCO                           | 50            | THF     | 42       | 25        | 13                     |
| 6     | TMEDA                           | 50            | THF     | 42       | 25        | 23                     |
| 7     | DMAP                            | 50            | THF     | 42       | 25        | 36                     |
| 8     | Barton's base                   | 50            | THF     | 42       | 25        | 42                     |
| 9     | K <sub>2</sub> CO <sub>3</sub>  | 50            | THF     | 42       | 25        | <5                     |
| 10    | Cs <sub>2</sub> CO <sub>3</sub> | 50            | THF     | 42       | 25        | 9                      |
| 11    | Cu(OTf) <sub>2</sub>            | 20            | THF     | 42       | 25        | nr                     |
| 12    | Zn(OTf) <sub>2</sub>            | 20            | THF     | 42       | 25        | <5                     |

<sup>a</sup>Conditions: 0.3 mmol of **1a**, 0.9 mmol of **2**, 1 mL of THF at 25 °C. <sup>b</sup>By NMR analysis. nr=no reaction.

## 2.2. Solvent and temperature optimization<sup>a</sup>

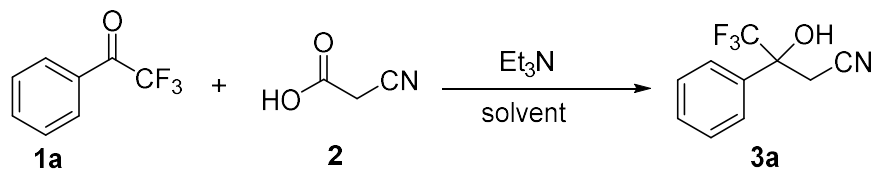

| entry           | $\text{Et}_3\text{N}$ (mol%) | solvent                  | time (h) | temp ( $^\circ\text{C}$ ) | yield (%) <sup>b</sup> |
|-----------------|------------------------------|--------------------------|----------|---------------------------|------------------------|
| 1               | 50                           | $\text{CH}_2\text{Cl}_2$ | 48       | 25                        | <5                     |
| 2               | 50                           | 1,4-Dioxane              | 48       | 25                        | 27                     |
| 3               | 50                           | Toluene                  | 48       | 25                        | <5                     |
| 4               | 50                           | $\text{CH}_3\text{CN}$   | 48       | 25                        | 8                      |
| 5               | 50                           | $\text{CH}_3\text{OH}$   | 48       | 25                        | <5                     |
| 6               | 50                           | $\text{H}_2\text{O}$     | 48       | 25                        | nr                     |
| 7               | 10                           | Neat, MW                 | 0.75     | 100                       | 89                     |
| 8               | 10                           | Neat, MW                 | 0.5      | 125                       | 90                     |
| 9               | 10                           | Neat, MW                 | 1        | 90                        | 35                     |
| 10              | 50                           | THF                      | 16       | 60                        | 99                     |
| 11              | 20                           | THF                      | 21       | 60                        | 98 <sup>d</sup>        |
| 12 <sup>c</sup> | 20                           | THF                      | 24       | 60                        | 98 <sup>d</sup>        |
| 13 <sup>c</sup> | 10                           | THF                      | 36       | 60                        | 91                     |

<sup>a</sup>Conditions: 0.3 mmol of **1a**, 0.9 mmol of **2**, 1 mL of solvent. <sup>b</sup>By NMR analysis. <sup>c</sup>Two equivalents of **2** were used. <sup>d</sup>Isolated yields. nr=no reaction.

### 3. Synthetic methods and compound characterization

#### 3.1. General procedure for the cyanomethylation of trifluoromethyl ketones

To a solution of a trifluoromethyl ketone (0.3 mmol) and cyanoacetic acid (0.6 mmol) in THF (1.0 mL) was added triethylamine (20 mol%). The resulting mixture was stirred at 60 °C for 24 to 30 hours and the reaction was monitored by  $^{19}\text{F}$  NMR for the disappearance of the trifluoromethyl ketone. The crude product was purified by flash chromatography on silica gel using hexanes-ethyl acetate as mobile phase as described below.

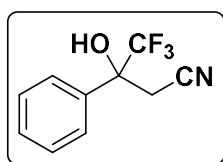

**4,4,4-Trifluoro-3-hydroxy-3-phenylbutanenitrile (3a).** Compound **3a** was obtained as a colorless solid in 98% yield (63 mg, 0.294 mmol) from 2,2,2-trifluoro-1-phenylethan-1-one (52 mg, 0.3 mmol) and cyanoacetic acid (51 mg, 0.6 mmol) in the presence of 20 mol% Et<sub>3</sub>N in 1 mL of THF after 24 hours at 60 °C by following the general procedure described above. Mp. 75.1-75.9 °C;  $R_f$  = 0.2 (hexanes/EtOAc, 8:2);  $^1\text{H}$  NMR (400 MHz, Chloroform-*d*)  $\delta$  = 7.61 – 7.52 (m, 2H), 7.52 – 7.42 (m, 3H), 3.25 – 3.12 (m, 2H), 3.12 (s, 1H);  $^{13}\text{C}$  NMR (100 MHz, Chloroform-*d*)  $\delta$  = 134.3, 129.8, 128.9, 125.9 (q,  $J_{\text{C-F}}$  = 1.3 Hz), 124.1 (q,  $J_{\text{C-F}}$  = 286.0 Hz), 114.8, 75.2 (q,  $J_{\text{C-F}}$  = 29.7 Hz), 26.9 (q,  $J_{\text{C-F}}$  = 1.7 Hz);  $^{19}\text{F}$  NMR (376 MHz, Chloroform-*d*)  $\delta$  = -79.5; HRMS (ESI-TOF)  $m/z$ :  $[\text{M}]^+$  calcd for C<sub>10</sub>H<sub>8</sub>F<sub>3</sub>NO 215.0558, found 215.0553.

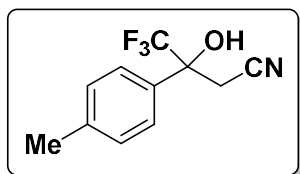

**4,4,4-Trifluoro-3-hydroxy-3-(*p*-tolyl)butanenitrile (3b).** Compound **3b** was obtained as a colorless solid in 97% yield (67 mg, 0.291 mmol) from 2,2,2-trifluoro-1-(*p*-tolyl)ethan-1-one (56 mg, 0.3 mmol) and cyanoacetic acid (51 mg, 0.6 mmol) in the presence of 20 mol% Et<sub>3</sub>N in 1 mL of THF after 24 hours at 60 °C by following the general procedure described above. Mp. 116.3-117.1 °C;  $R_f$  = 0.2 (hexanes/EtOAc, 8:2);  $^1\text{H}$  NMR (400 MHz, Chloroform-*d*)  $\delta$  = 7.42 (d,

$J = 7.9$  Hz, 2H), 7.25 (d,  $J = 7.9$  Hz, 2H), 3.38 (s, 1H), 3.23 – 3.08 (m, 2H), 2.37 (s, 3H);  $^{13}\text{C}$  NMR (100 MHz, Chloroform-*d*)  $\delta = 140.0, 131.4, 129.6, 125.8$  (q,  $J_{\text{C-F}} = 1.5$  Hz), 124.2 (q,  $J_{\text{C-F}} = 286.0$  Hz), 114.8, 75.2 (q,  $J_{\text{C-F}} = 29.8$  Hz), 26.9 (q,  $J_{\text{C-F}} = 1.7$  Hz), 21.1;  $^{19}\text{F}$  NMR (376 MHz, Chloroform-*d*)  $\delta = -79.8$ ; HRMS (ESI-TOF)  $m/z$ :  $[\text{M}]^+$  calcd for  $\text{C}_{11}\text{H}_{10}\text{F}_3\text{NO}$  229.0714, found 229.0707.

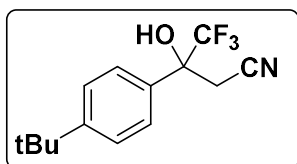

**3-(4-(*tert*-Butyl)phenyl)-4,4,4-trifluoro-3-hydroxybutanenitrile (3c).** Compound **3c** was obtained as a colorless solid in 98% yield (80 mg, 0.294 mmol) from 1-(4-(*tert*-butyl)phenyl)-2,2,2-trifluoroethan-1-one (69 mg, 0.3 mmol) and cyanoacetic acid (51 mg, 0.6 mmol) in the presence of 20 mol%  $\text{Et}_3\text{N}$  in 1 mL of THF after 24 hours at 60 °C by following the general procedure described above. Mp. 127.6-128.6 °C;  $R_f = 0.3$  (hexanes/EtOAc, 8:2);  $^1\text{H}$  NMR (400 MHz, Chloroform-*d*)  $\delta = 7.52 - 7.44$  (m, 4H), 3.24 – 3.16 (m, 2H), 3.00 (s, 1H), 1.34 (s, 9H);  $^{13}\text{C}$  NMR (100 MHz, Chloroform-*d*)  $\delta = 152.9, 131.3, 125.8, 125.6$  (q,  $J_{\text{C-F}} = 1.4$  Hz), 124.2 (q,  $J_{\text{C-F}} = 286.1$  Hz), 115.0, 75.1 (q,  $J_{\text{C-F}} = 29.7$  Hz), 34.6, 31.1, 26.8 (q,  $J_{\text{C-F}} = 1.7$  Hz);  $^{19}\text{F}$  NMR (376 MHz, Chloroform-*d*)  $\delta = -79.6$ ; HRMS (ESI-TOF)  $m/z$ :  $[\text{M}]^+$  calcd for  $\text{C}_{14}\text{H}_{16}\text{F}_3\text{NO}$  271.1184, found 271.1175.

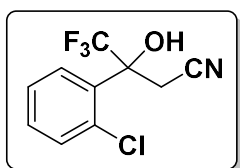

**3-(2-Chlorophenyl)-4,4,4-trifluoro-3-hydroxybutanenitrile (3d).** Compound **3d** was obtained as a colorless solid in 93% yield (69 mg, 0.279 mmol) from 1-(2-chlorophenyl)-2,2,2-trifluoroethan-1-one (62 mg, 0.3 mmol) and cyanoacetic acid (51 mg, 0.6 mmol) in the presence of 20 mol%  $\text{Et}_3\text{N}$  in 1 mL of THF after 24 hours at 60 °C by following the general procedure described above. Mp. 87.5-88.3 °C;  $R_f = 0.2$  (hexanes/EtOAc, 8:2);  $^1\text{H}$  NMR (400 MHz, Chloroform-*d*)  $\delta = 7.67$  (m, 1H), 7.47 (m, 1H), 7.43 – 7.36 (m, 2H), 4.52 (s, 1H), 3.73 (d,  $J = 17.1$  Hz, 1H), 3.31 (d,  $J = 17.1$  Hz, 1H);  $^{13}\text{C}$  NMR (100 MHz, Chloroform-*d*)  $\delta = 132.4, 132.0,$

131.4, 130.7, 130.3 (q,  $J_{C-F} = 1.3$  Hz), 127.6, 124.2 (q,  $J_{C-F} = 287.5$  Hz), 114.9, 76.6 (q,  $J_{C-F} = 30.7$  Hz), 26.4 (q,  $J_{C-F} = 1.9$  Hz);  $^{19}\text{F}$  NMR (376 MHz, Chloroform-*d*)  $\delta = -78.8$ ; HRMS (ESI-TOF)  $m/z$ :  $[\text{M}]^+$  calcd for  $\text{C}_{10}\text{H}_7\text{ClF}_3\text{NO}$  249.0168, found 249.0166.

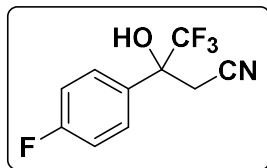

**4,4,4-Trifluoro-3-(4-fluorophenyl)-3-hydroxybutanenitrile (3e).** Compound **3e** was obtained as a colorless solid in 99% yield (69 mg, 0.297 mmol) from 2,2,2-trifluoro-1-(4-fluorophenyl)ethan-1-one (57 mg, 0.3 mmol) and cyanoacetic acid (51 mg, 0.6 mmol) in the presence of 20 mol%  $\text{Et}_3\text{N}$  in 1 mL of THF after 24 hours at 60 °C by following the general procedure described above. Mp. 111.5-112.7 °C;  $R_f = 0.2$  (hexanes/EtOAc, 8:2);  $^1\text{H}$  NMR (400 MHz, Chloroform-*d*)  $\delta = 7.55$  (dd,  $J = 8.7, 5.0$  Hz, 2H), 7.20 – 7.09 (m, 2H), 3.55 (s, 1H), 3.22 – 3.13 (m, 2H);  $^{13}\text{C}$  NMR (100 MHz, Chloroform-*d*)  $\delta = 163.5$  (d,  $J_{C-F} = 250.3$  Hz), 130.1 (d,  $J_{C-F} = 3.4$  Hz), 128.1 (dq,  $J_{C-F} = 8.7, 1.5$  Hz), 124.1 (q,  $J_{C-F} = 285.8$  Hz), 116.0 (d,  $J_{C-F} = 21.9$  Hz), 114.5, 75.0 (q,  $J_{C-F} = 30.0$  Hz), 27.1 (q,  $J_{C-F} = 1.8$  Hz);  $^{19}\text{F}$  NMR (376 MHz, Chloroform-*d*)  $\delta = -79.7$  (s, 3F), -111.0 (m, 1F); HRMS (ESI-TOF)  $m/z$ :  $[\text{M}]^+$  calcd for  $\text{C}_{10}\text{H}_7\text{F}_4\text{NO}$  233.0464, found 233.0459.

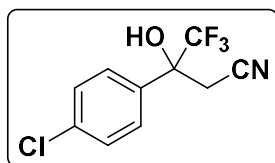

**3-(4-Chlorophenyl)-4,4,4-trifluoro-3-hydroxybutanenitrile (3f).** Compound **3f** was obtained as a colorless solid in 99% yield (74 mg, 0.297 mmol) from 1-(4-chlorophenyl)-2,2,2-trifluoroethan-1-one (62 mg, 0.3 mmol) and cyanoacetic acid (51 mg, 0.6 mmol) in the presence of 20 mol%  $\text{Et}_3\text{N}$  in 1 mL of THF after 24 hours at 60 °C by following the general procedure described above. Mp. 123.0-124.3 °C;  $R_f = 0.2$  (hexanes/EtOAc, 8:2);  $^1\text{H}$  NMR (400 MHz, Chloroform-*d*)  $\delta = 7.53 - 7.50$  (m, 2H), 7.49 – 7.43 (m, 2H), 3.19 (s, 2H), 3.00 (s, 1H);  $^{13}\text{C}$  NMR (100 MHz, Chloroform-*d*)  $\delta = 136.2, 132.8, 129.2, 127.5$  (q,  $J_{C-F} = 1.5$  Hz), 124.0 (q,  $J_{C-F} = 286.1$  Hz), 114.4, 75.0 (q,  $J_{C-F} = 29.9$  Hz), 27.1 (q,  $J_{C-F} = 1.7$  Hz);  $^{19}\text{F}$  NMR (376 MHz,

Chloroform-*d*)  $\delta = -79.6$ ; HRMS (ESI-TOF)  $m/z$ :  $[M]^+$  calcd for  $C_{10}H_7ClF_3NO$  249.0168, found 249.0166.

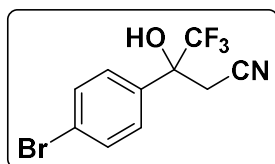

**3-(4-Bromophenyl)-4,4,4-trifluoro-3-hydroxybutanenitrile (3g).** Compound **3g** was obtained as a colorless solid in 96% yield (84 mg, 0.288 mmol) from 1-(4-bromophenyl)-2,2,2-trifluoroethan-1-one (76 mg, 0.3 mmol) and cyanoacetic acid (51 mg, 0.6 mmol) in the presence of 20 mol%  $Et_3N$  in 1 mL of THF after 24 hours at 60 °C by following the general procedure described above. Mp. 121.3-122.6 °C;  $R_f = 0.3$  (hexanes/EtOAc, 8:2);  $^1H$  NMR (400 MHz, Chloroform-*d*)  $\delta = 7.60$  (d,  $J = 8.5$  Hz, 2H), 7.43 (d,  $J = 8.5$  Hz, 2H), 3.63 (s, 1H), 3.17 (s, 2H);  $^{13}C$  NMR (100 MHz, Chloroform-*d*)  $\delta = 133.3$ , 132.1, 127.7 (q,  $J_{C-F} = 1.4$  Hz), 124.5, 123.9 (q,  $J_{C-F} = 286.1$  Hz), 114.5, 75.0 (q,  $J_{C-F} = 29.9$  Hz), 27.0 (q,  $J_{C-F} = 1.7$  Hz);  $^{19}F$  NMR (376 MHz, Chloroform-*d*)  $\delta = -79.7$ ; HRMS (ESI-TOF)  $m/z$ :  $[M]^+$  calcd for  $C_{10}H_7BrF_3NO$  292.9663, found 292.9658.

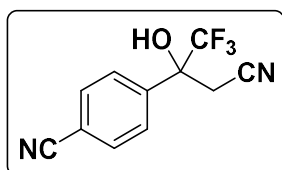

**4-(3-Cyano-1,1,1-trifluoro-2-hydroxypropan-2-yl)benzonitrile (3h).** Compound **3h** was obtained as a colorless solid in 97% yield (70 mg, 0.291 mmol) from 4-(2,2,2-trifluoroacetyl)benzonitrile (60 mg, 0.3 mmol) and cyanoacetic acid (51 mg, 0.6 mmol) in the presence of 20 mol%  $Et_3N$  in 1 mL of THF after 24 hours at 60 °C by following the general procedure described above. Mp. 123.7-124.8 °C;  $R_f = 0.4$  (hexanes/EtOAc, 1:1);  $^1H$  NMR (400 MHz, DMSO-*d*<sub>6</sub>)  $\delta = 8.01 - 7.95$  (m, 2H), 7.91 - 7.84 (m, 3H), 3.85 (d,  $J = 17.1$  Hz, 1H), 3.43 (d,  $J = 17.1$  Hz, 1H);  $^{13}C$  NMR (100 MHz, DMSO-*d*<sub>6</sub>)  $\delta = 141.1$ , 132.3, 127.8, 124.4 (q,  $J_{C-F} = 287.7$  Hz), 118.3, 116.2, 112.2, 74.2 (q,  $J_{C-F} = 28.8$  Hz), 25.5;  $^{19}F$  NMR ((376 MHz, DMSO-*d*<sub>6</sub>)  $\delta = -78.5$ ; HRMS (ESI-TOF)  $m/z$ :  $[M]^+$  calcd for  $C_{11}H_7F_3N_2O$  240.051, found 240.0508.



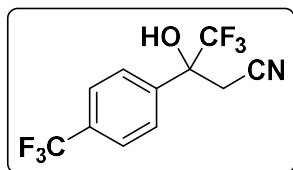

**4,4,4-Trifluoro-3-hydroxy-3-(4-(trifluoromethyl)phenyl)butanenitrile (3i).** Compound **3i** was obtained as a colorless solid in 99% yield (84 mg, 0.297 mmol) from 2,2,2-trifluoro-1-(4-(trifluoromethyl)phenyl)ethan-1-one (73 mg, 0.3 mmol) and cyanoacetic acid (51 mg, 0.6 mmol) in the presence of 20 mol% Et<sub>3</sub>N in 1 mL of THF after 24 hours at 60 °C by following the general procedure described above. Mp. 71.6-72.4 °C; *R<sub>f</sub>* = 0.3 (hexanes/EtOAc, 8:2); <sup>1</sup>H NMR (400 MHz, Chloroform-*d*) δ = 7.75 – 7.70 (m, 4H), 3.53 (s, 1H), 3.23 (s, 2H); <sup>13</sup>C NMR (100 MHz, Chloroform-*d*) δ = 138.1, 132.1 (q, *J*<sub>C-F</sub> = 33.0 Hz), 126.7 (q, *J*<sub>C-F</sub> = 1.4 Hz), 125.9 (q, *J*<sub>C-F</sub> = 3.8 Hz), 123.9 (q, *J*<sub>C-F</sub> = 285.1 Hz), 123.6 (q, *J*<sub>C-F</sub> = 271.3 Hz), 114.4, 75.1 (q, *J*<sub>C-F</sub> = 30.1 Hz), 27.0 (q, *J*<sub>C-F</sub> = 1.7 Hz); <sup>19</sup>F NMR (376 MHz, Chloroform-*d*) δ = -63.1 (s, 3F), -79.5 (s, 3F); HRMS (ESI-TOF) *m/z*: [M]<sup>+</sup> calcd for C<sub>11</sub>H<sub>7</sub>F<sub>6</sub>NO 283.0432, found 283.0427.

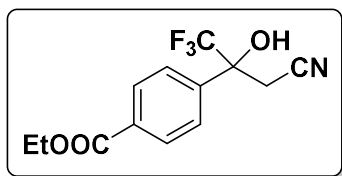

**Ethyl 4-(3-cyano-1,1,1-trifluoro-2-hydroxypropan-2-yl)benzoate (3j).** Compound **3j** was obtained as a colorless oil in 96% yield (83 mg, 0.288 mmol) from ethyl 4-(2,2,2-trifluoroacetyl)benzoate (74 mg, 0.3 mmol) and cyanoacetic acid (51 mg, 0.6 mmol) in the presence of 20 mol% Et<sub>3</sub>N in 1 mL of THF after 30 hours at 60 °C by following the general procedure described above. *R<sub>f</sub>* = 0.3 (hexanes/EtOAc, 8:2); <sup>1</sup>H NMR (400 MHz, Chloroform-*d*) δ = 8.09 (d, *J* = 8.8 Hz, 2H), 7.67 (d, *J* = 8.8 Hz, 2H), 4.49 (s, 1H), 4.39 (q, *J* = 7.2 Hz, 2H), 3.22 (s, 2H), 1.39 (t, *J* = 7.2 Hz, 3H); <sup>13</sup>C NMR (100 MHz, Chloroform-*d*) δ = 166.2, 139.2, 131.6, 129.9, 126.3 (q, *J*<sub>C-F</sub> = 1.6 Hz), 124.1 (q, *J*<sub>C-F</sub> = 286.4 Hz), 114.5, 75.1 (q, *J*<sub>C-F</sub> = 29.8 Hz), 61.5, 26.9 (q, *J*<sub>C-F</sub> = 1.8 Hz), 14.2; <sup>19</sup>F NMR (376 MHz, Chloroform-*d*) δ = -79.4; HRMS (ESI-TOF) *m/z*: [M]<sup>+</sup> calcd for C<sub>13</sub>H<sub>12</sub>F<sub>3</sub>NO<sub>3</sub> 287.0769, found 287.0763.

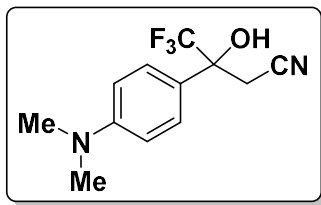

**3-(4-(Dimethylamino)phenyl)-4,4,4-trifluoro-3-hydroxybutanenitrile (3k).** Compound **3k** was obtained as a colorless solid in 93% yield (58 mg, 0.279 mmol) from 1-(4-(dimethylamino)phenyl)-2,2,2-trifluoroethan-1-one (72 mg, 0.3 mmol) and cyanoacetic acid (51 mg, 0.6 mmol) in the presence of 20 mol% Et<sub>3</sub>N in 1 mL of THF after 30 hours at 60 °C by following the general procedure described above. Mp. 110.3-111.2 °C; *R<sub>f</sub>* = 0.4 (hexanes/EtOAc, 1:1); <sup>1</sup>H NMR (400 MHz, Chloroform-*d*) δ = 7.37 (dd, *J* = 7.2, 2.0 Hz, 2H), 6.73 (dd, *J* = 7.2, 2.0 Hz, 2H), 3.44 (s, 1H), 3.19 – 3.07 (m, 2H), 2.98 (s, 6H); <sup>13</sup>C NMR (100 MHz, Chloroform-*d*) δ = 151.0, 126.8 (q, *J*<sub>C-F</sub> = 1.6 Hz), 124.4 (q, *J*<sub>C-F</sub> = 286.0 Hz), 121.2, 115.2, 112.0, 75.1 (q, *J*<sub>C-F</sub> = 29.6 Hz), 40.1, 26.7 (q, *J*<sub>C-F</sub> = 1.7 Hz); <sup>19</sup>F NMR (376 MHz, Chloroform-*d*) δ = -79.9; HRMS (ESI-TOF) *m/z*: [M]<sup>+</sup> calcd for C<sub>12</sub>H<sub>13</sub>F<sub>3</sub>N<sub>2</sub>O 258.098, found 258.097.

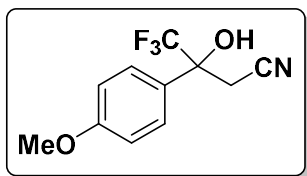

**4,4,4-Trifluoro-3-hydroxy-3-(4-methoxyphenyl)butanenitrile (3l).** Compound **3l** was obtained as a colorless solid in 96% yield (70 mg, 0.288 mmol) from 2,2,2-trifluoro-1-(4-methoxyphenyl)ethan-1-one (61 mg, 0.3 mmol) and cyanoacetic acid (51 mg, 0.6 mmol) in the presence of 20 mol% Et<sub>3</sub>N in 1 mL of THF after 30 hours at 60 °C by following the general procedure described above. Mp. 89.1-90.4 °C; *R<sub>f</sub>* = 0.5 (hexanes/EtOAc, 1:1); <sup>1</sup>H NMR (400 MHz, Chloroform-*d*) δ = 7.46 (d, *J* = 8.8 Hz, 2H), 6.96 (d, *J* = 8.8 Hz, 2H), 3.83 (s, 3H), 3.61 (s, 1H), 3.25 – 3.05 (m, 2H); <sup>13</sup>C NMR (100 MHz, Chloroform-*d*) δ = 160.5, 127.4 (q, *J*<sub>C-F</sub> = 1.6 Hz), 126.2, 124.2 (q, *J*<sub>C-F</sub> = 286.0 Hz), 115.0, 114.2, 75.0 (q, *J*<sub>C-F</sub> = 29.8 Hz), 55.3, 26.9 (q, *J*<sub>C-F</sub> = 1.7 Hz); <sup>19</sup>F NMR (376 MHz, Chloroform-*d*) δ = -79.9; HRMS (ESI-TOF) *m/z*: [M]<sup>+</sup> calcd for C<sub>11</sub>H<sub>10</sub>F<sub>3</sub>NO<sub>2</sub> 245.0664, found 245.0658.

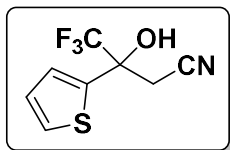

**4,4,4-Trifluoro-3-hydroxy-3-(thiophen-2-yl)butanenitrile (3m).** Compound **3m** was obtained as a colorless solid in 94% yield (62 mg, 0.282 mmol) from 2,2,2-trifluoro-1-(thiophen-2-yl)ethan-1-one (54 mg, 0.3 mmol) and cyanoacetic acid (51 mg, 0.6 mmol) in the presence of 20 mol% Et<sub>3</sub>N in 1 mL of THF after 24 hours at 60 °C by following the general procedure described above. Mp. 64.0-65.2 °C; *R<sub>f</sub>* = 0.3 (hexanes/EtOAc, 8:2); <sup>1</sup>H NMR (400 MHz, Chloroform-*d*) δ = 7.43 (dd, *J* = 5.2, 1.2 Hz, 1H), 7.23 (d, *J* = 5.2 Hz, 1H), 7.08 (dd, *J* = 5.2, 5.2 Hz, 1H), 3.82 (s, 1H), 3.21 – 3.12 (m, 2H); <sup>13</sup>C NMR (100 MHz, Chloroform-*d*) δ = 137.7, 127.6, 127.5, 126.9 (q, *J*<sub>C-F</sub> = 1.6 Hz), 123.7 (d, *J*<sub>C-F</sub> = 286.0 Hz), 114.3, 74.5 (q, *J*<sub>C-F</sub> = 31.2 Hz), 27.9 (q, *J*<sub>C-F</sub> = 1.6 Hz); <sup>19</sup>F NMR (376 MHz, Chloroform-*d*) δ = -80.5; HRMS (ESI-TOF) *m/z*: [M]<sup>+</sup> calcd for C<sub>8</sub>H<sub>6</sub>F<sub>3</sub>NOS 221.0122, found 221.0119.

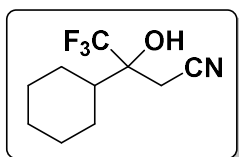

**3-Cyclohexyl-4,4,4-trifluoro-3-hydroxybutanenitrile (3n).** Compound **3n** was obtained as a colorless solid in 92% yield (61 mg, 0.276 mmol) from 1-cyclohexyl-2,2,2-trifluoroethan-1-one (54 mg, 0.3 mmol) and cyanoacetic acid (51 mg, 0.6 mmol) in the presence of 20 mol% Et<sub>3</sub>N in 1 mL of THF after 30 hours at 60 °C by following the general procedure described above. Mp. 50.2-51.4 °C; *R<sub>f</sub>* = 0.3 (hexanes/EtOAc, 8:2); <sup>1</sup>H NMR (400 MHz, Chloroform-*d*) δ = 2.87 (s, 1H), 2.79 (s, 2H), 1.98 – 1.79 (m, 5H), 1.71 (m, 1H), 1.38 – 1.04 (m, 5H); <sup>13</sup>C NMR (100 MHz, Chloroform-*d*) δ = 125.3 (q, *J*<sub>C-F</sub> = 288.1 Hz), 115.3, 75.8 (q, *J*<sub>C-F</sub> = 27.2 Hz), 43.1, 26.8 (q, *J*<sub>C-F</sub> = 1.8 Hz), 26.3, 25.8, 22.5 (q, *J*<sub>C-F</sub> = 2.3 Hz); <sup>19</sup>F NMR (376 MHz, Chloroform-*d*) δ = -75.9; HRMS (ESI-TOF) *m/z*: [M]<sup>+</sup> calcd for C<sub>10</sub>H<sub>14</sub>F<sub>3</sub>NO 221.1027, found 221.1024.

### 3.2. Gram scale synthesis of 4,4,4-trifluoro-3-hydroxy-3-phenylbutanenitrile (**3a**)

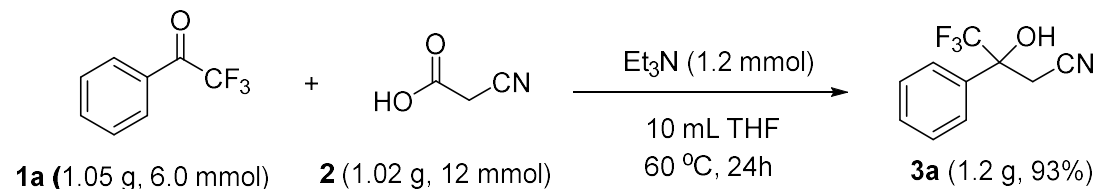

### 3.3. General procedure for the cyanomethylation of difluoromethyl ketones

To a solution of a difluoromethyl ketone (0.3 mmol) and cyanoacetic acid (0.6 mmol) in THF (1.0 mL) was added triethylamine (20 mol%). The resulting mixture was stirred at 70 °C for 48 hours and the reaction was monitored by  $^{19}\text{F}$  NMR for the disappearance of the difluoromethyl ketone. The crude product was purified by flash chromatography on silica gel using hexanes-ethyl acetate as mobile phase as described below.

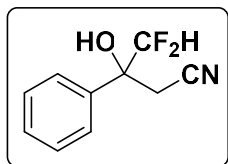

**4,4-Difluoro-3-hydroxy-3-phenylbutanenitrile (5a).** Compound **5a** was obtained as a colorless oil in 99% yield (58 mg, 0.297 mmol) from 2,2-difluoro-1-phenylethan-1-one (47 mg, 0.3 mmol) and cyanoacetic acid (51 mg, 0.6 mmol) in the presence of 20 mol%  $\text{Et}_3\text{N}$  in 1 mL of THF after 48 hours at 70 °C by following the general procedure described above.  $R_f = 0.16$  (hexanes/EtOAc, 8:2);  $^1\text{H}$  NMR (400 MHz, Chloroform-*d*)  $\delta = 7.51$  (dd,  $J = 7.7, 2.0$  Hz, 2H), 7.48 – 7.40 (m, 3H), 5.83 (t,  $J = 55.6$  Hz, 1H), 3.30 (s, 1H), 3.07 (s, 2H);  $^{13}\text{C}$  NMR (100 MHz, Chloroform-*d*)  $\delta = 136.3$  (t,  $J_{\text{C-F}} = 1.4$  Hz), 129.5, 129.1, 125.8 (t,  $J_{\text{C-F}} = 1.5$  Hz), 115.8, 115.6 (t,  $J_{\text{C-F}} = 251.0$  Hz), 74.6 (t,  $J_{\text{C-F}} = 22.1$  Hz), 25.7 (t,  $J_{\text{C-F}} = 3.3$  Hz);  $^{19}\text{F}$  NMR (376 MHz, Chloroform-*d*)  $\delta = -129.0$  (dd,  $J = 282.0, 56.4$  Hz, 1F),  $-130.0$  (dd,  $J = 282.0, 56.4$  Hz, 1F); HRMS (ESI-TOF)  $m/z$ :  $[\text{M}]^+$  calcd for  $\text{C}_{10}\text{H}_9\text{F}_2\text{NO}$  197.0652, found 197.0648.

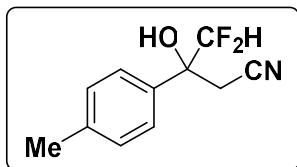

**4,4-Difluoro-3-hydroxy-3-(*p*-tolyl)butanenitrile (5b).** Compound **5b** was obtained as a colorless oil in 92% yield (58 mg, 0.276 mmol) from 2,2-difluoro-1-(*p*-tolyl)ethan-1-one (51 mg, 0.3 mmol) and cyanoacetic acid (51 mg, 0.6 mmol) in the presence of 20 mol% Et<sub>3</sub>N in 1 mL of THF after 48 hours at 70 °C by following the general procedure described above. *R<sub>f</sub>* = 0.13 (hexanes/EtOAc, 8:2); <sup>1</sup>H NMR (400 MHz, Chloroform-*d*) δ = 7.42 – 7.36 (m, 2H), 7.28 – 7.23 (m, 2H), 5.83 (t, *J* = 55.6 Hz, 1H), 3.07 (s, 2H), 2.93 (s, 1H), 2.38 (s, 3H); <sup>13</sup>C NMR (100 MHz, Chloroform-*d*) δ = 139.6, 133.3, 129.9, 125.7 (t, *J*<sub>C-F</sub> = 1.5 Hz), 115.7, 115.6 (t, *J*<sub>C-F</sub> = 250.1 Hz), 74.6 (t, *J*<sub>C-F</sub> = 22.2 Hz), 25.7 (t, *J*<sub>C-F</sub> = 3.3 Hz), 21.2; <sup>19</sup>F NMR (376 MHz, Chloroform-*d*) δ = -129.1 (dd, *J* = 280.9, 56.4 Hz, 1F), -130.2 (dd, *J* = 281.0, 56.3 Hz, 1F); HRMS (ESI-TOF) *m/z*: [M]<sup>+</sup> calcd for C<sub>11</sub>H<sub>11</sub>F<sub>2</sub>NO 211.0809, found 211.0800.

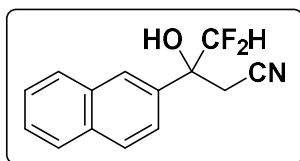

**4,4-Difluoro-3-hydroxy-3-(naphthalen-2-yl)butanenitrile (5c).** Compound **5c** was obtained as a colorless solid in 93% yield (69 mg, 0.279 mmol) from 2,2-difluoro-1-(naphthalen-2-yl)ethan-1-one (62 mg, 0.3 mmol) and cyanoacetic acid (51 mg, 0.6 mmol) in the presence of 20 mol% Et<sub>3</sub>N in 1 mL of THF after 48 hours at 70 °C by following the general procedure described above. Mp. 80.0-82.9 °C; *R<sub>f</sub>* = 0.13 (hexanes/EtOAc, 8:2); <sup>1</sup>H NMR (400 MHz, Chloroform-*d*) δ = 8.03 (s, 1H), 7.95 – 7.80 (m, 3H), 7.62 – 7.48 (m, 3H), 5.92 (t, *J* = 55.5 Hz, 1H), 3.30 (s, 1H), 3.16 (s, 2H); <sup>13</sup>C NMR (100 MHz, Chloroform-*d*) δ = 133.6 (t, *J*<sub>C-F</sub> = 1.5 Hz), 133.5, 133.0, 129.1, 128.6, 127.8, 127.3, 127.0, 125.8 (t, *J*<sub>C-F</sub> = 1.5 Hz), 122.7 (t, *J*<sub>C-F</sub> = 1.6 Hz), 115.7, 115.6 (t, *J*<sub>C-F</sub> = 250.5 Hz), 74.8 (t, *J*<sub>C-F</sub> = 22.1 Hz), 25.8 (t, *J*<sub>C-F</sub> = 3.2 Hz); <sup>19</sup>F NMR (376 MHz, Chloroform-*d*) δ = -128.7 (dd, *J* = 281.6, 56.4 Hz, 1F), -129.6 (dd, *J* = 282.4, 56.4 Hz, 1F); HRMS (ESI-TOF) *m/z*: [M]<sup>+</sup> calcd for C<sub>14</sub>H<sub>11</sub>F<sub>2</sub>NO 247.0809, found 247.0803.

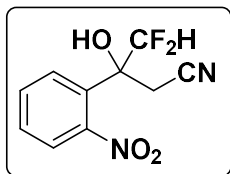

**4,4-Difluoro-3-hydroxy-3-(2-nitrophenyl)butanenitrile (5d).** Compound **5d** was obtained as a colorless oil in 99% yield (72 mg, 0.297 mmol) from 2,2-difluoro-1-(2-nitrophenyl)ethan-1-one (60 mg, 0.3 mmol) and cyanoacetic acid (51 mg, 0.6 mmol) in the presence of 20 mol% Et<sub>3</sub>N in 1 mL of THF after 48 hours at 70 °C by following the general procedure described above. *R<sub>f</sub>* = 0.1 (hexanes/EtOAc, 1:1); <sup>1</sup>H NMR (400 MHz, Chloroform-*d*) δ = 7.68 – 7.61 (m, 2H), 7.60 – 7.52 (m, 2H), 6.36 (t, *J* = 56.0 Hz, 1H), 3.44 (s, 1H), 3.34 (d, *J* = 17.2 Hz, 1H), 3.21 (d, *J* = 17.2 Hz, 1H); <sup>13</sup>C NMR (100 MHz, Chloroform-*d*) δ = 150.5, 132.0, 130.9, 128.9 (t, *J*<sub>C-F</sub> = 1.9 Hz), 128.8 (t, *J*<sub>C-F</sub> = 1.6 Hz), 125.3, 115.1, 114.3 (t, *J*<sub>C-F</sub> = 250.5 Hz), 75.6 (t, *J*<sub>C-F</sub> = 22.1 Hz), 25.3 (t, *J*<sub>C-F</sub> = 3.8 Hz); <sup>19</sup>F NMR (376 MHz, Chloroform-*d*) δ = -129.0 (dd, *J* = 286.1, 55.3 Hz, 1F), -130.4 (dd, *J* = 286.1, 56.4 Hz, 1F); HRMS (ESI-TOF) *m/z*: [M]<sup>+</sup> calcd for C<sub>10</sub>H<sub>8</sub>F<sub>2</sub>N<sub>2</sub>O<sub>3</sub> 242.0503, found 242.05.

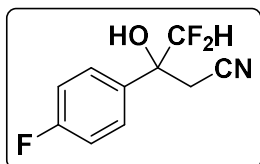

**4,4-Difluoro-3-(4-fluorophenyl)-3-hydroxybutanenitrile (5e).** Compound **5e** was obtained as a colorless solid in 92% yield (59 mg, 0.276 mmol) from 2,2-difluoro-1-(4-fluorophenyl)ethan-1-one (52 mg, 0.3 mmol) and cyanoacetic acid (51 mg, 0.6 mmol) in the presence of 20 mol% Et<sub>3</sub>N in 1 mL of THF after 48 hours at 70 °C by following the general procedure described above. Mp. 71.2-72.6 °C; *R<sub>f</sub>* = 0.18 (hexanes/EtOAc, 8:2); <sup>1</sup>H NMR (400 MHz, Chloroform-*d*) δ = 7.50 – 7.46 (m, 2H), 7.12 (dd, *J* = 8.6, 7.8 Hz, 2H), 5.77 (t, *J* = 55.6 Hz, 1H), 3.49 (s, 1H), 3.05 (s, 2H); <sup>13</sup>C NMR (100 MHz, Chloroform-*d*) δ = 163.3 (d, *J*<sub>C-F</sub> = 249.1 Hz), 132.1 (t, *J*<sub>C-F</sub> = 2.6 Hz), 128.0 (dt, *J*<sub>C-F</sub> = 8.6, 1.6 Hz), 116.0 (d, *J*<sub>C-F</sub> = 21.7 Hz), 115.7, 115.4 (t, *J*<sub>C-F</sub> = 251.3 Hz), 74.3 (t, *J*<sub>C-F</sub> = 22.2 Hz), 25.7 (t, *J*<sub>C-F</sub> = 3.3 Hz); <sup>19</sup>F NMR (376 MHz, Chloroform-*d*) δ = -112.1 (m, 1F), -129.1 (dd, *J* = 282.0, 56.4 Hz, 1F), -129.8 (dd, *J* = 282.0, 56.4 Hz, 1F); HRMS (ESI-TOF) *m/z*: [M]<sup>+</sup> calcd for C<sub>10</sub>H<sub>8</sub>F<sub>3</sub>NO 215.0558, found 215.0554.

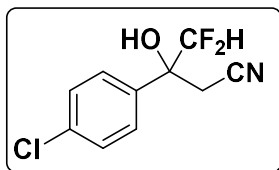

**3-(4-Chlorophenyl)-4,4-difluoro-3-hydroxybutanenitrile (5f).** Compound **5f** was obtained as a colorless solid in 99% yield (68 mg, 0.297 mmol) from 1-(4-chlorophenyl)-2,2-difluoroethan-1-one (57 mg, 0.3 mmol) and cyanoacetic acid (51 mg, 0.6 mmol) in the presence of 20 mol% Et<sub>3</sub>N in 1 mL of THF after 48 hours at 70 °C by following the general procedure described above. Mp. 64.2-64.8 °C; *R<sub>f</sub>* = 0.13 (hexanes/EtOAc, 8:2); <sup>1</sup>H NMR (400 MHz, Chloroform-*d*) δ = 7.56 – 7.33 (m, 4H), 5.79 (t, *J* = 55.5 Hz, 1H), 3.30 (s, 1H), 3.05 (s, 2H); <sup>13</sup>C NMR (100 MHz, Chloroform-*d*) δ = 135.8, 134.7, 129.3, 127.4 (t, *J*<sub>C-F</sub> = 1.5 Hz), 115.5, 115.3 (t, *J*<sub>C-F</sub> = 250.5 Hz), 74.4 (t, *J*<sub>C-F</sub> = 22.3 Hz), 25.8 (t, *J*<sub>C-F</sub> = 3.3 Hz); <sup>19</sup>F NMR (376 MHz, Chloroform-*d*) δ = -128.9 (dd, *J* = 282.4, 56.4 Hz, 1F), -129.8 (dd, *J* = 282.4, 56.4 Hz, 1F); HRMS (ESI-TOF) *m/z*: [M]<sup>+</sup> calcd for C<sub>10</sub>H<sub>8</sub>ClF<sub>2</sub>NO 231.0262, found 231.0256.

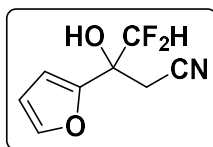

**4,4-Difluoro-3-(furan-2-yl)-3-hydroxybutanenitrile (5g).** Compound **5g** was obtained as a colorless oil in 90% yield (51 mg, 0.27 mmol) from 2,2-difluoro-1-(furan-2-yl)ethan-1-one (44 mg, 0.3 mmol) and cyanoacetic acid (51 mg, 0.6 mmol) in the presence of 20 mol% Et<sub>3</sub>N in 1 mL of THF after 48 hours at 70 °C by following the general procedure described above. *R<sub>f</sub>* = 0.12 (hexanes/EtOAc, 7:3); <sup>1</sup>H NMR (400 MHz, Chloroform-*d*) δ = 7.49 (m, 1H), 6.58 (d, *J* = 3.4 Hz, 1H), 6.45 (dd, *J* = 3.4, 1.8 Hz, 1H), 5.95 (t, *J* = 55.3 Hz, 1H), 3.32 (s, 1H), 3.14 – 3.02 (m, 2H); <sup>13</sup>C NMR (100 MHz, Chloroform-*d*) δ = 148.9 (t, *J*<sub>C-F</sub> = 1.5 Hz), 144.0, 115.3, 114.3 (t, *J*<sub>C-F</sub> = 251.1 Hz), 111.2, 109.8 (t, *J*<sub>C-F</sub> = 1.3 Hz), 72.0 (t, *J*<sub>C-F</sub> = 23.6 Hz), 23.8 (t, *J*<sub>C-F</sub> = 3.2 Hz); <sup>19</sup>F NMR (376 MHz, Chloroform-*d*) δ = -130.0 (dd, *J* = 282.7, 56.4 Hz, 1F), -131.0 (dd, *J* = 282.5, 56.4 Hz, 1F); HRMS (ESI-TOF) *m/z*: [M]<sup>+</sup> calcd for C<sub>8</sub>H<sub>7</sub>F<sub>2</sub>NO<sub>2</sub> 187.0445, found 187.044.

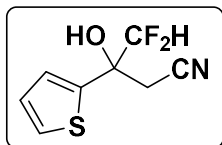

**4,4-Difluoro-3-hydroxy-3-(thiophen-2-yl)butanenitrile (5h).** Compound **5h** was obtained as a colorless oil in 94% yield (57 mg, 0.282 mmol) from 2,2-difluoro-1-(thiophen-2-yl)ethan-1-one (49 mg, 0.3 mmol) and cyanoacetic acid (51 mg, 0.6 mmol) in the presence of 20 mol% Et<sub>3</sub>N in 1 mL of THF after 48 hours at 70 °C by following the general procedure described above.  $R_f$  = 0.17 (hexanes/EtOAc, 8:2); <sup>1</sup>H NMR (400 MHz, Chloroform-*d*)  $\delta$  = 7.41 (d,  $J$  = 5.1 Hz, 1H), 7.16 (d,  $J$  = 3.6 Hz, 1H), 7.07 (dd,  $J$  = 4.9, 3.9 Hz, 1H), 5.87 (t,  $J$  = 55.6 Hz, 1H), 3.49 (s, 1H), 3.12 – 3.03 (m, 2H); <sup>13</sup>C NMR (100 MHz, Chloroform-*d*)  $\delta$  = 139.8 (t,  $J_{C-F}$  = 1.6 Hz), 127.7, 127.2, 126.2 (t,  $J_{C-F}$  = 1.6 Hz), 115.4, 114.9 (t,  $J_{C-F}$  = 251.9 Hz), 74.0 (t,  $J_{C-F}$  = 23.4 Hz), 26.6 (t,  $J_{C-F}$  = 3.0 Hz); <sup>19</sup>F NMR (376 MHz, Chloroform-*d*)  $\delta$  = -128.9 (dd,  $J$  = 281.2, 56.0 Hz, 1F), -129.7 (dd,  $J$  = 281.2, 55.6 Hz, 1F); HRMS (ESI-TOF)  $m/z$ : [M]<sup>+</sup> calcd for C<sub>8</sub>H<sub>7</sub>F<sub>2</sub>NOS 203.0216, found 203.021.

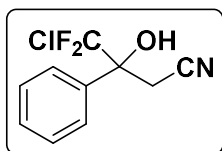

**4-Chloro-4,4-difluoro-3-hydroxy-3-phenylbutanenitrile (7).** To a solution of 2-chloro-2,2-difluoro-1-phenylethan-1-one (**6**) (57 mg, 0.3 mmol) and cyanoacetic acid (51 mg, 0.6 mmol) in THF (1.0 mL) was added triethylamine (20 mol%). The resulting mixture was stirred at 70 °C for 48 hours and the reaction was monitored by <sup>19</sup>F NMR for the disappearance of chlorodifluoromethyl ketone **6**. The crude product was purified by flash chromatography on silica gel using hexanes-ethyl acetate (9:1) as mobile phase. Compound **7** was obtained as a colorless solid in 96% yield (66 mg, 0.288 mmol). mp: 102.9-103.5 °C;  $R_f$  = 0.2 (hexanes/EtOAc, 8:2); <sup>1</sup>H NMR (400 MHz, Chloroform-*d*)  $\delta$  = 7.57 (dd,  $J$  = 7.7, 1.9 Hz, 2H), 7.48 – 7.44 (m, 3H), 3.45 (s, 1H), 3.34 – 3.18 (m, 2H); <sup>13</sup>C NMR (100 MHz, Chloroform-*d*)  $\delta$  = 135.0, 130.0, 129.9 (t,  $J_{C-F}$  = 300.0 Hz), 128.9, 126.4 (t,  $J_{C-F}$  = 1.8 Hz), 115.1, 78.8 (t,  $J_{C-F}$  = 25.3 Hz), 27.4 (t,  $J_{C-F}$  = 2.2 Hz); <sup>19</sup>F NMR (376 MHz, Chloroform-*d*)  $\delta$  = -64.2; HRMS (ESI-TOF)  $m/z$ : [M]<sup>+</sup> calcd for C<sub>10</sub>H<sub>8</sub>ClF<sub>2</sub>NO 231.0262, found 231.0255.



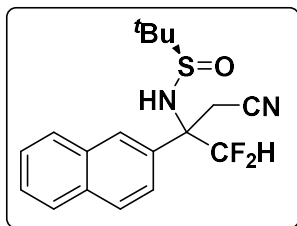

**(R)-N-(3-cyano-1,1-difluoro-2-(naphthalen-2-yl)propan-2-yl)-2-methylpropane-2-sulfonamide (9).** To a solution of 2-chloro-2,2-difluoro-1-phenylethan-1-one (**4c**) (250 mg, 1.21 mmol) and (*R*)-2-methylpropane-2-sulfonamide (161mg, 1.33 mmol) in THF (5.0 mL) was added  $\text{Ti}(\text{OEt})_4$  (552 mg, 2.42 mmol) and the reaction was refluxed for 48 hours. Cyanoacetic acid (308 mg, 3.63 mmol) and triethylamine (20 mol%) were added to the reaction mixture and stirred at 70 °C for another 48 hours. The crude product was purified by flash chromatography on silica gel using hexanes-ethyl acetate (8:2) as mobile phase. Compound **9** was obtained as a pale yellow solid in 82% yield (347 mg, 0.992 mmol). mp: 109.2-110.1 °C;  $R_f = 0.21$  (hexanes/EtOAc, 7:3);  $^1\text{H NMR}$  (400 MHz, Chloroform-*d*)  $\delta = 8.01$  (s, 1H), 7.97 – 7.81 (m, 3H), 7.64 (dd,  $J = 8.9, 2.0$  Hz, 1H), 7.58 – 7.52 (m, 2H), 6.64 (t,  $J = 54.5$  Hz, 1H), 4.41 (s, 1H), 3.34 – 3.13 (m, 2H), 1.29 (s, 9H);  $^{13}\text{C NMR}$  (100 MHz, Chloroform-*d*)  $\delta = 133.3, 132.7, 131.6, 129.1, 128.7, 127.5, 127.5, 127.1, 126.9, 124.0, 115.7, 115.6$  (t,  $J_{\text{C-F}} = 243.8$  Hz), 63.1 (t,  $J_{\text{C-F}} = 20.6$  Hz), 57.3, 25.1 (t,  $J_{\text{C-F}} = 3.4$  Hz), 22.6;  $^{19}\text{F NMR}$  (376 MHz, Chloroform-*d*)  $\delta =$  Major diastereomer: -122.5 (dd,  $J = 282.0, 54.7$  Hz, 1F), -129.5 (dd,  $J = 282.0, 54.3$  Hz, 1F); Minor diastereomer: -125.3 (dd,  $J = 279.1, 55.6$  Hz, 1F), -127.3 (dd,  $J = 279.1, 54.5$  Hz, 1F); HRMS (ESI-TOF)  $m/z$ :  $[\text{M}]^+$  calcd for  $\text{C}_{18}\text{H}_{20}\text{F}_2\text{N}_2\text{OS}$  350.1264, found 350.1265.

#### 4. NMR spectra

##### $^1\text{H}$ NMR spectrum of 4,4,4-trifluoro-3-hydroxy-3-phenylbutanenitrile (3a).

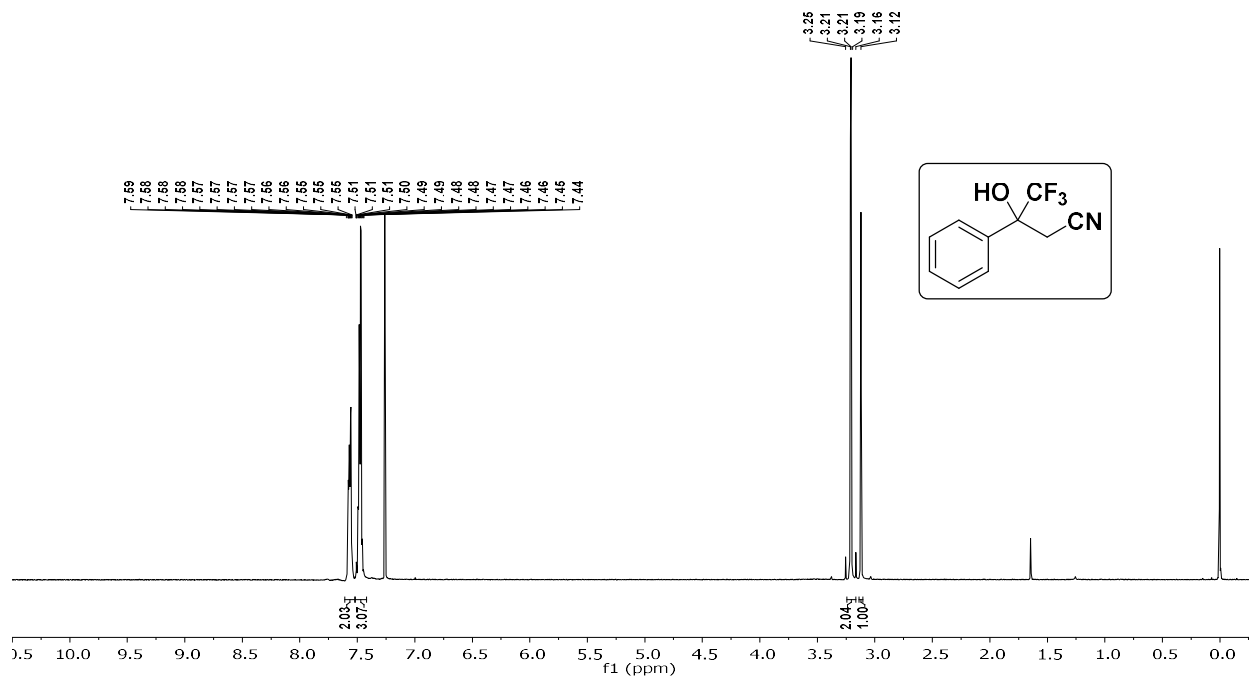

##### $^{13}\text{C}$ NMR spectrum of 4,4,4-trifluoro-3-hydroxy-3-phenylbutanenitrile (3a).

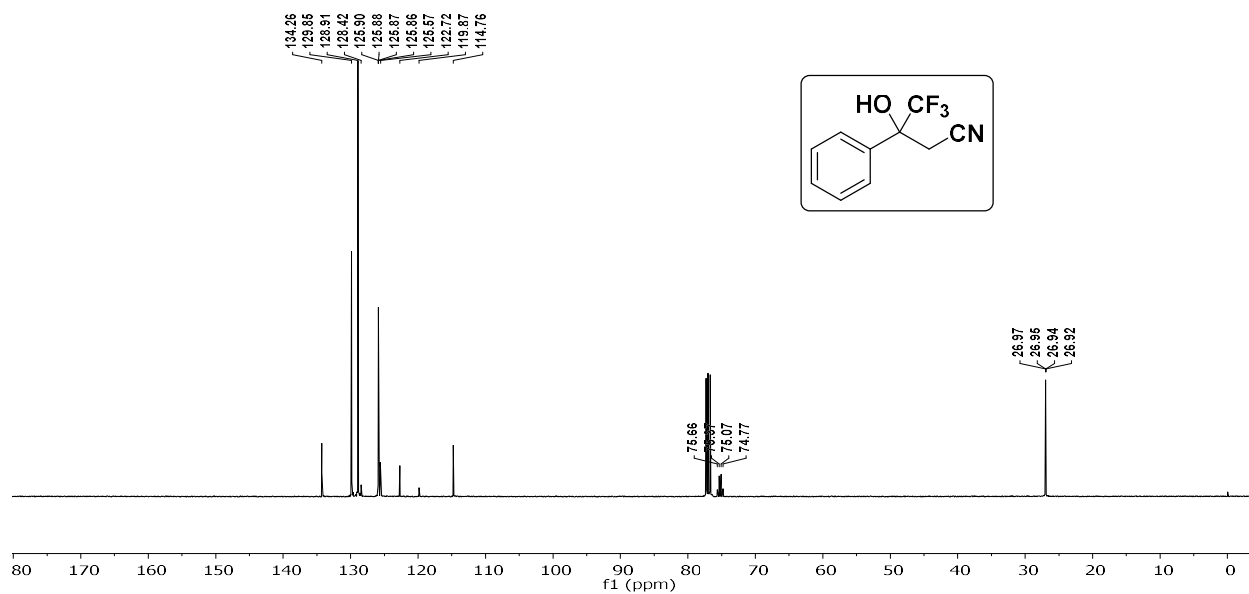

**$^{19}\text{F}$  NMR spectrum of 4,4,4-trifluoro-3-hydroxy-3-phenylbutanenitrile (3a).**

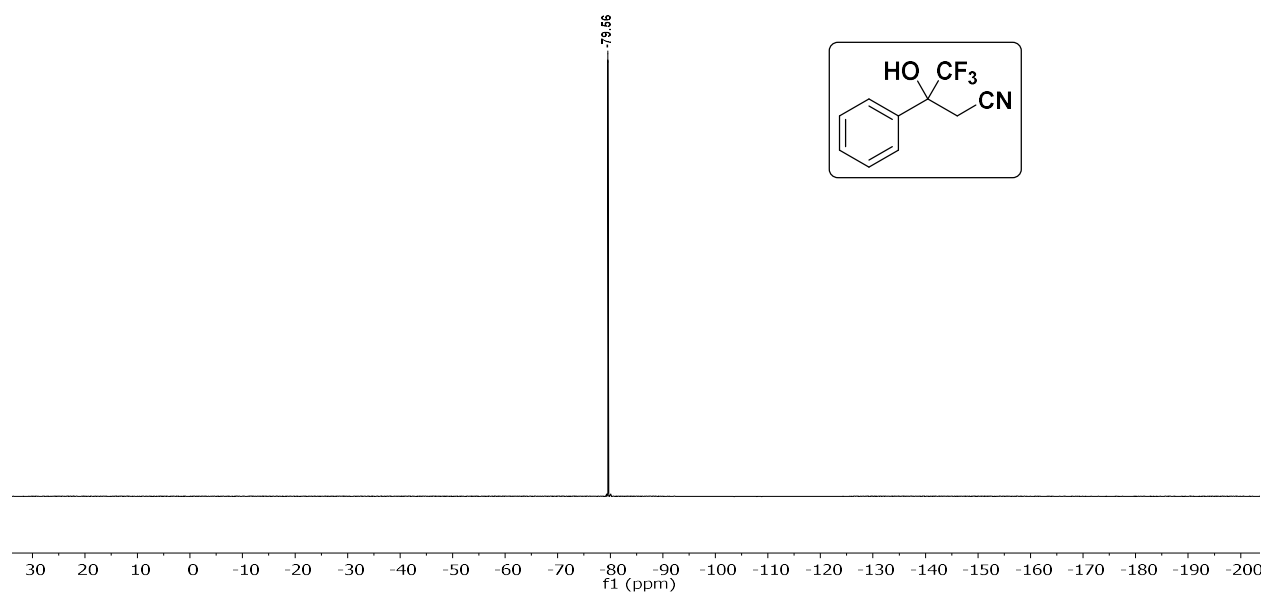

**$^1\text{H}$  NMR spectrum of 4,4,4-trifluoro-3-hydroxy-3-(*p*-tolyl)butanenitrile (3b).**

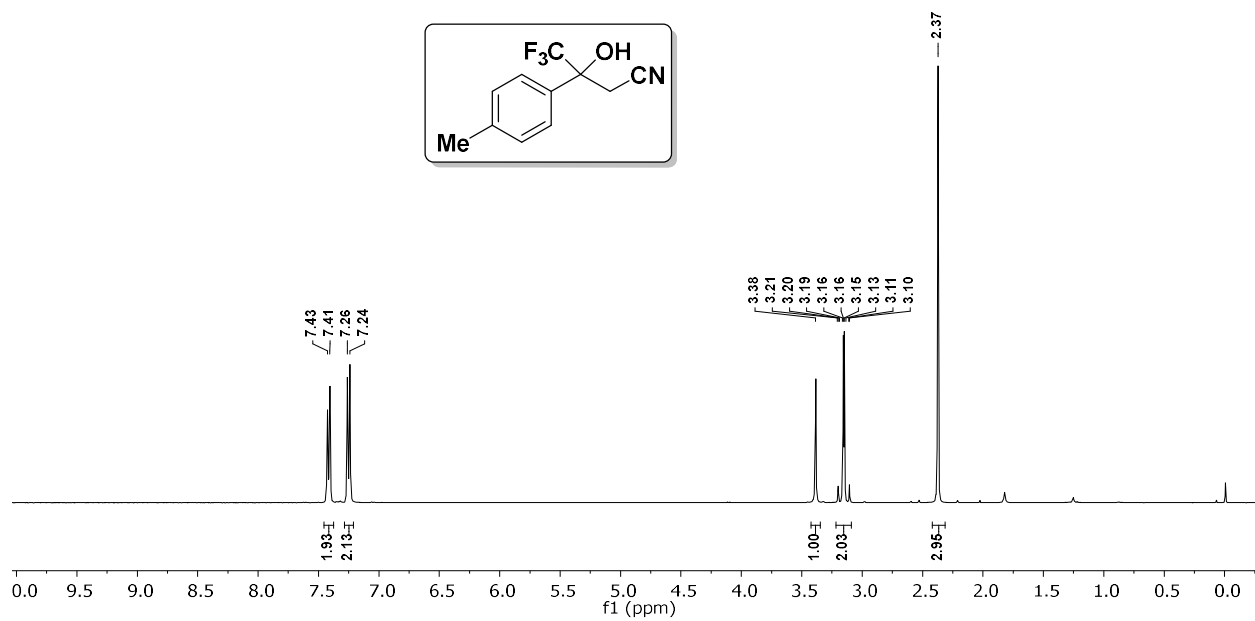

**<sup>13</sup>C NMR spectrum of 4,4,4-trifluoro-3-hydroxy-3-(*p*-tolyl)butanenitrile (3b).**

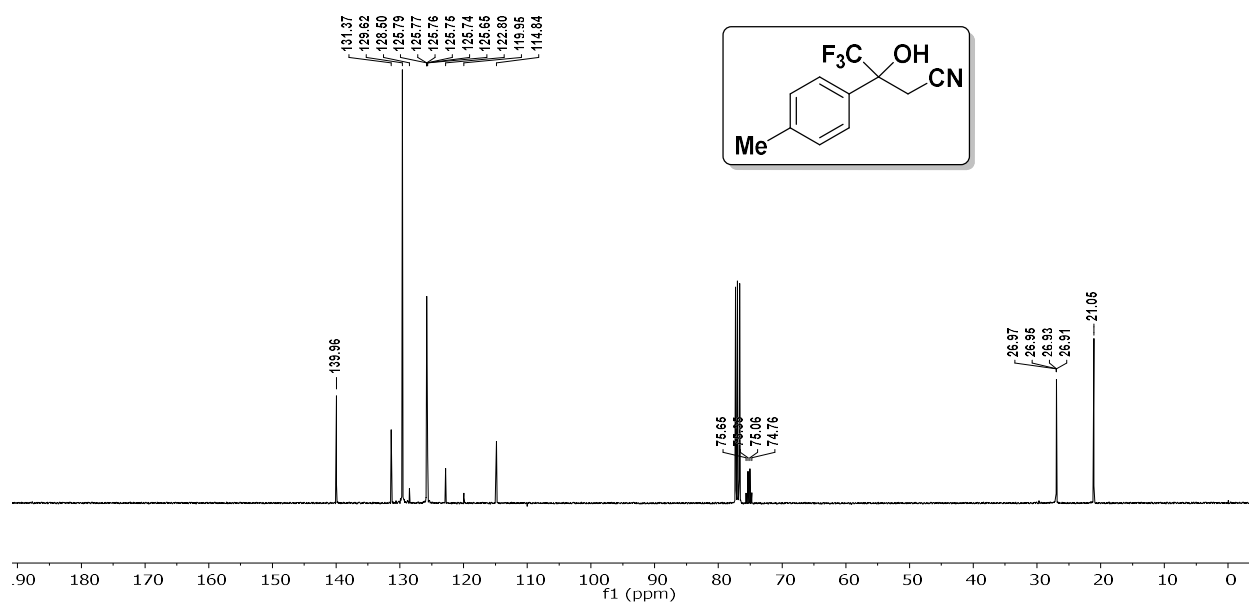

**<sup>19</sup>F NMR spectrum of 4,4,4-trifluoro-3-hydroxy-3-(*p*-tolyl)butanenitrile (3b).**

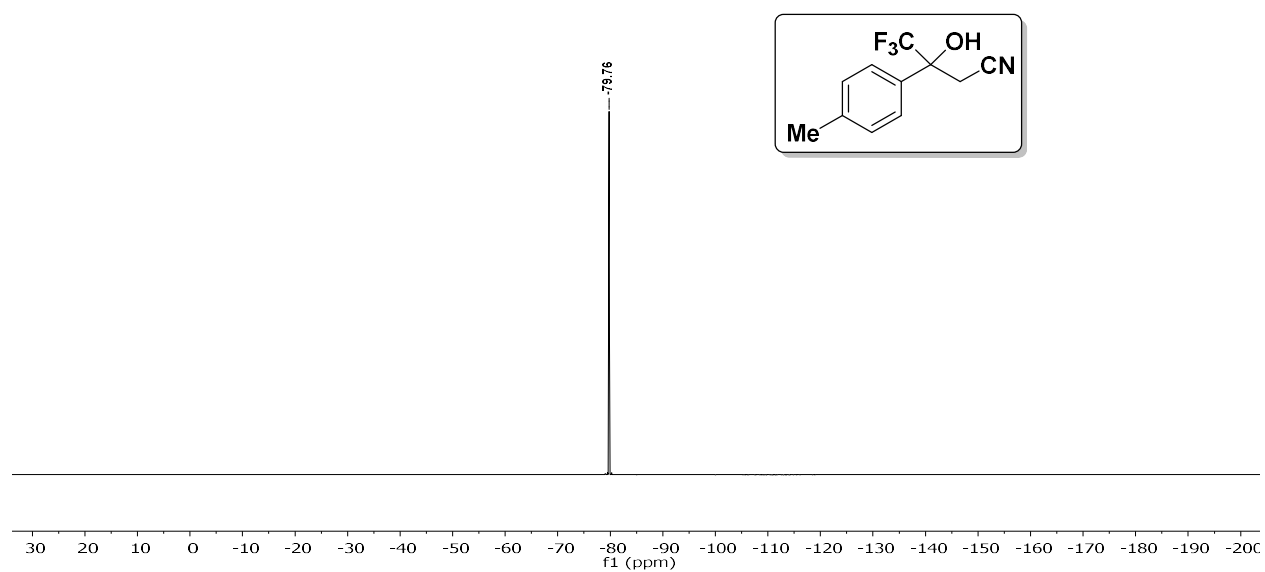

**<sup>1</sup>H NMR spectrum of 3-(4-(*tert*-butyl)phenyl)-4,4,4-trifluoro-3-hydroxybutanenitrile (3c).**

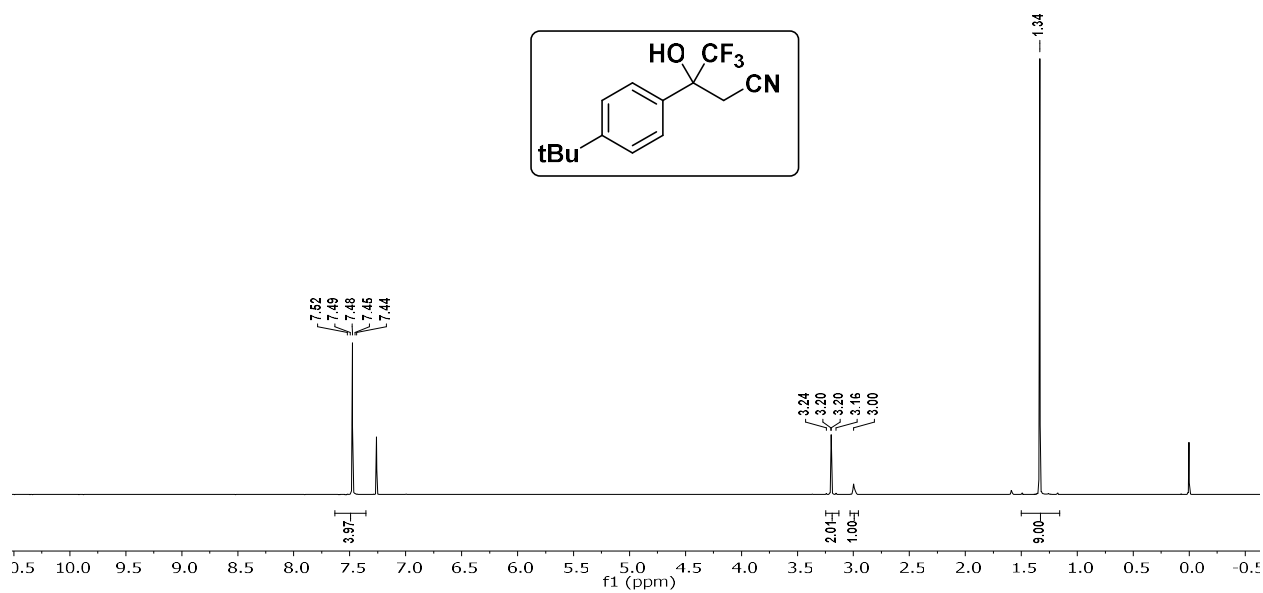

**<sup>13</sup>C NMR spectrum of 3-(4-(*tert*-butyl)phenyl)-4,4,4-trifluoro-3-hydroxybutanenitrile (3c).**

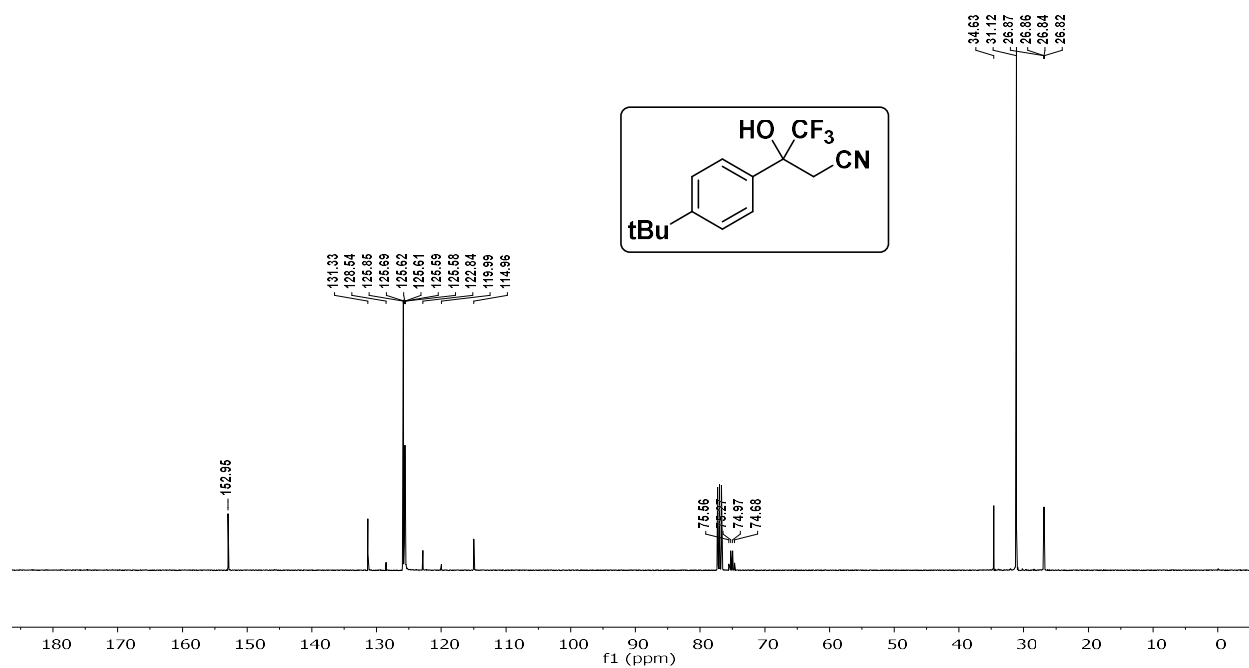

**$^{19}\text{F}$  NMR spectrum of 3-(4-(*tert*-butyl)phenyl)-4,4,4-trifluoro-3-hydroxybutanenitrile (3c).**

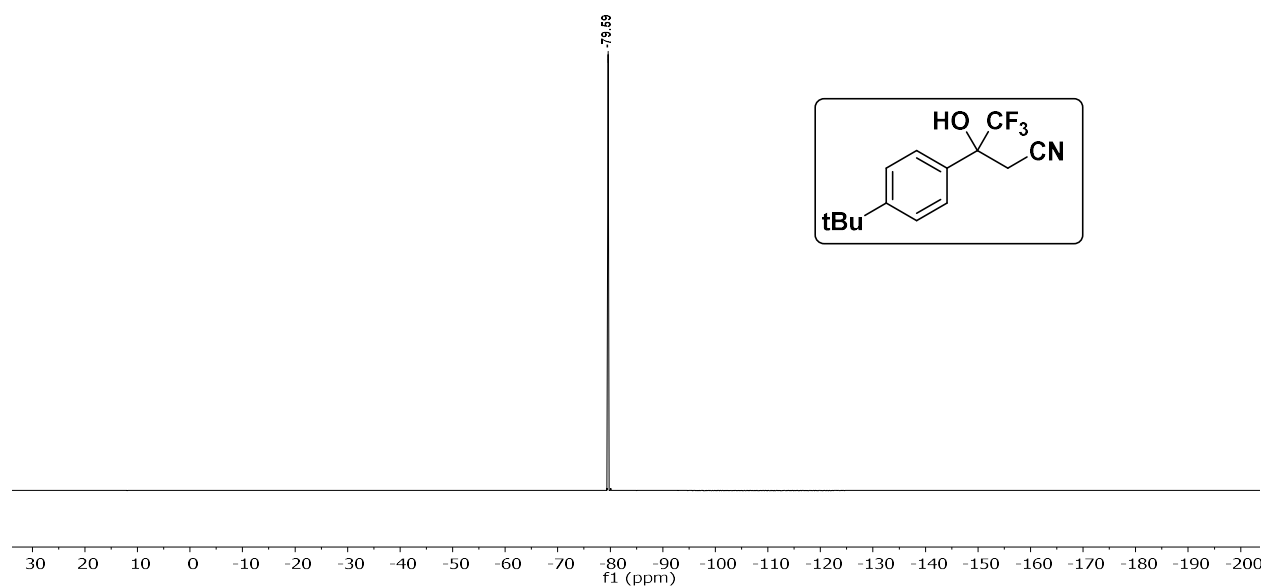

**$^1\text{H}$  NMR spectrum of 3-(2-chlorophenyl)-4,4,4-trifluoro-3-hydroxybutanenitrile (3d).**

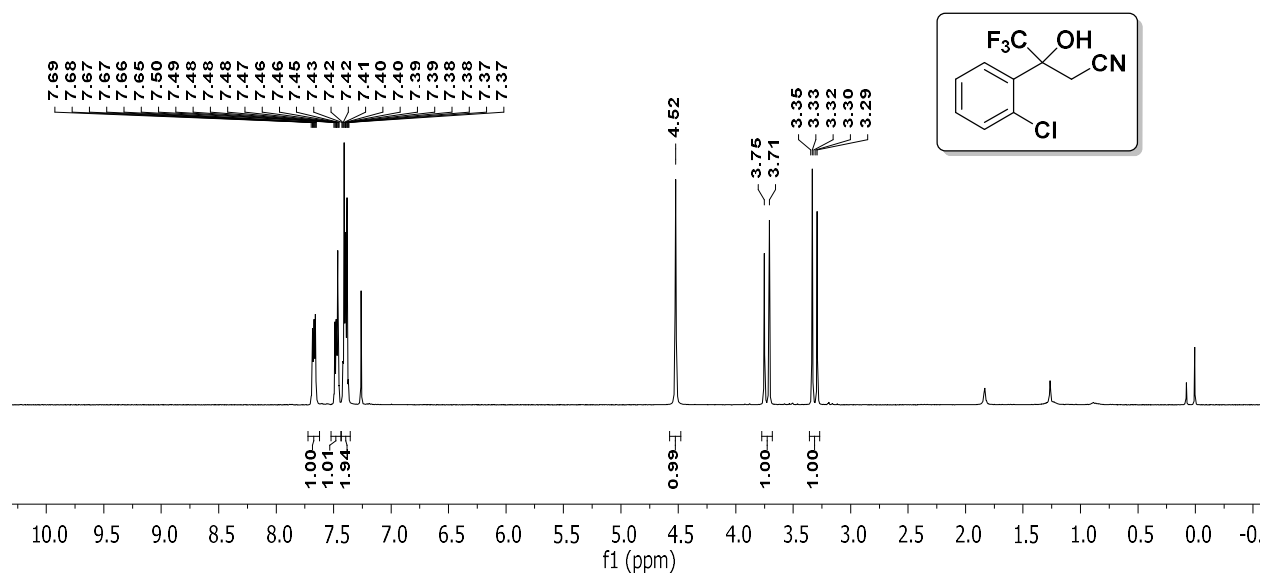

**<sup>13</sup>C NMR spectrum of 3-(2-chlorophenyl)-4,4,4-trifluoro-3-hydroxybutanenitrile (3d).**

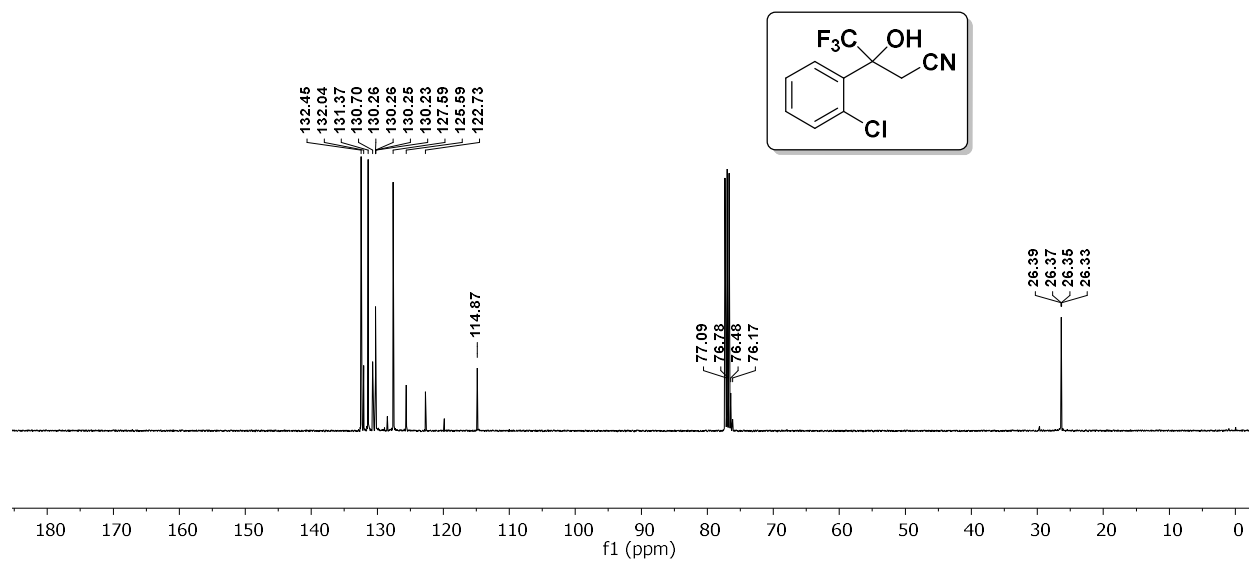

**<sup>19</sup>F NMR spectrum of 3-(2-chlorophenyl)-4,4,4-trifluoro-3-hydroxybutanenitrile (3d).**

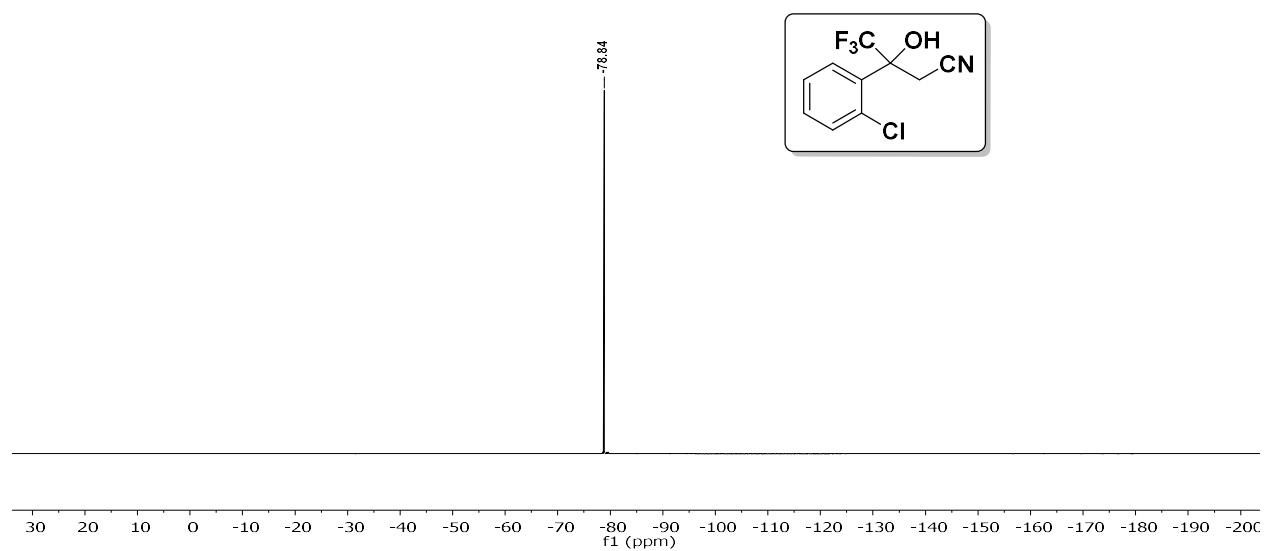

**<sup>1</sup>H NMR spectrum of 4,4,4-trifluoro-3-(4-fluorophenyl)-3-hydroxybutanenitrile (3e).**

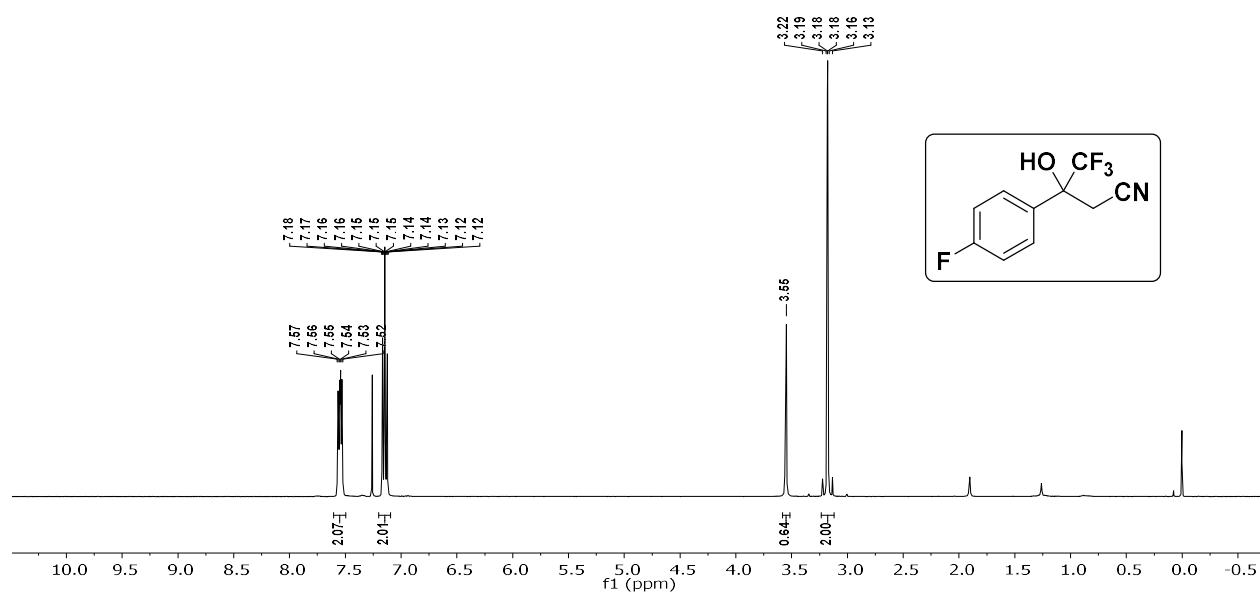

**<sup>13</sup>C NMR spectrum of 4,4,4-trifluoro-3-(4-fluorophenyl)-3-hydroxybutanenitrile (3e).**

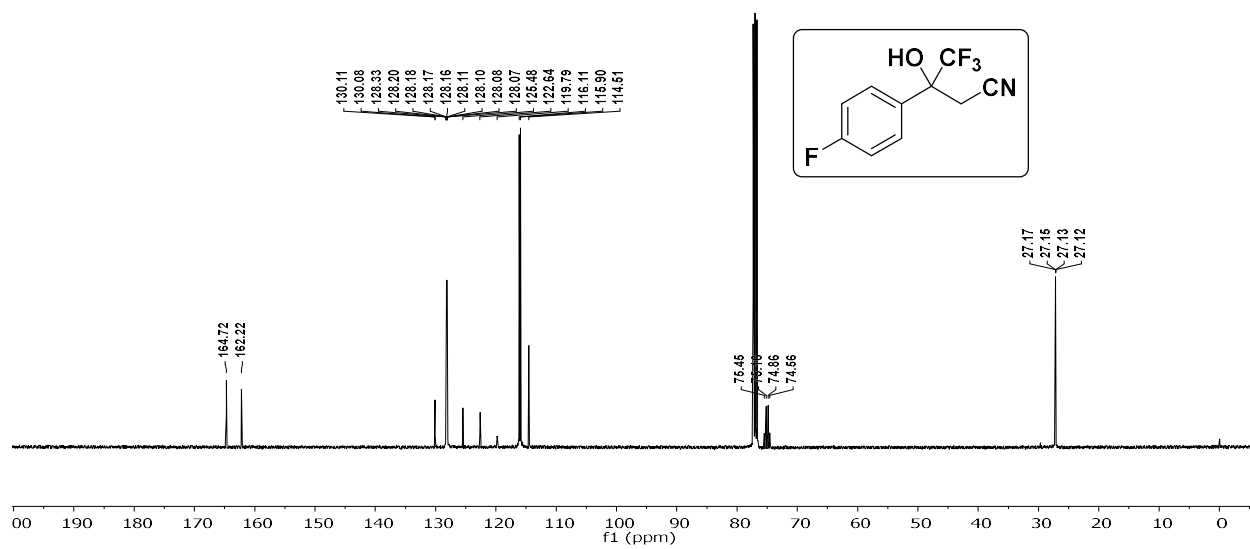



**$^{19}\text{F}$  NMR spectrum of 4,4,4-trifluoro-3-(4-fluorophenyl)-3-hydroxybutanenitrile (3e).**

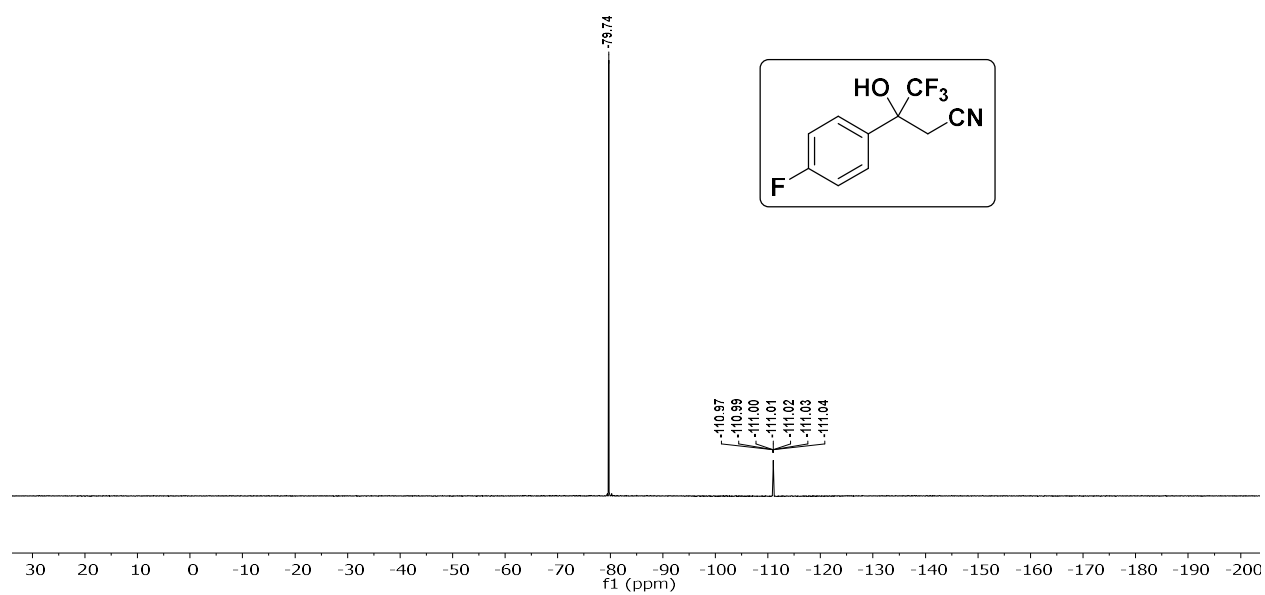

**$^1\text{H}$  NMR spectrum of 3-(4-chlorophenyl)-4,4,4-trifluoro-3-hydroxybutanenitrile (3f).**

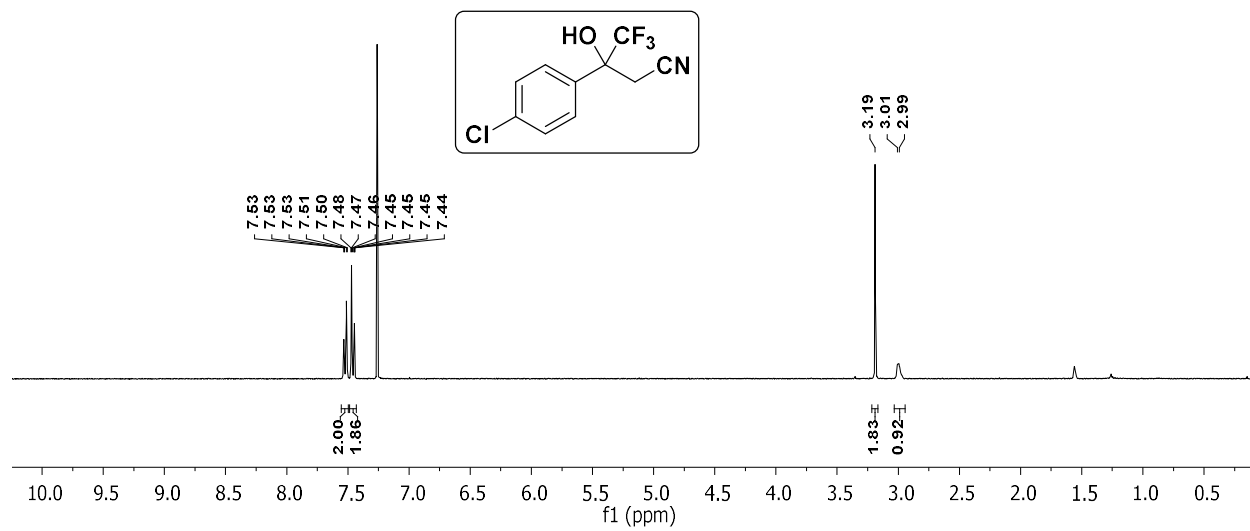

**$^{13}\text{C}$  NMR spectrum of 3-(4-chlorophenyl)-4,4,4-trifluoro-3-hydroxybutanenitrile (3f).**

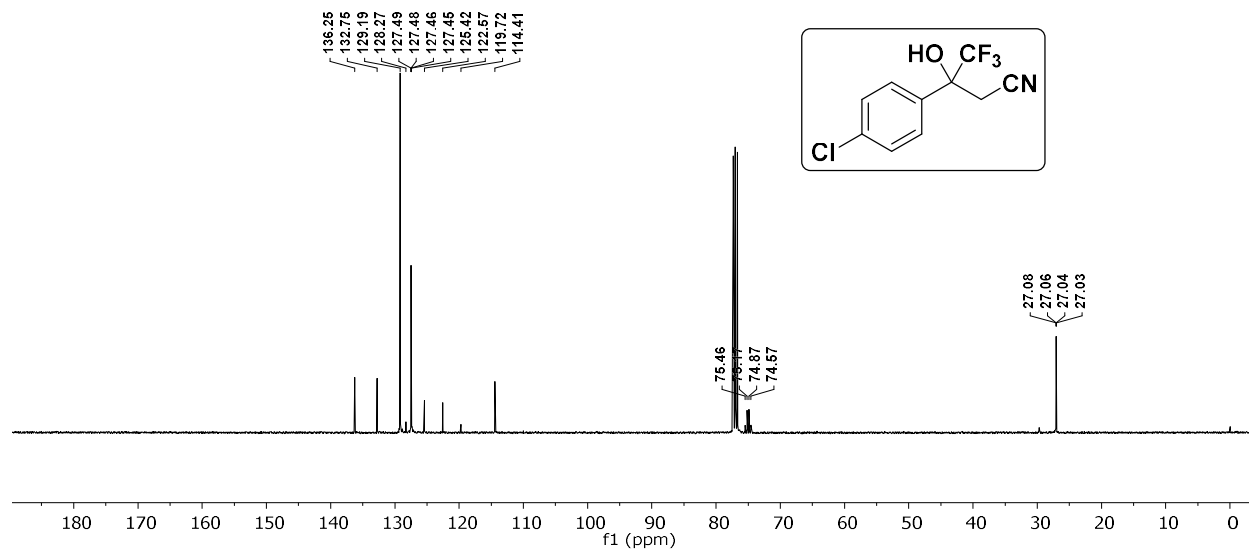

**$^{19}\text{F}$  NMR spectrum of 3-(4-chlorophenyl)-4,4,4-trifluoro-3-hydroxybutanenitrile (3f).**

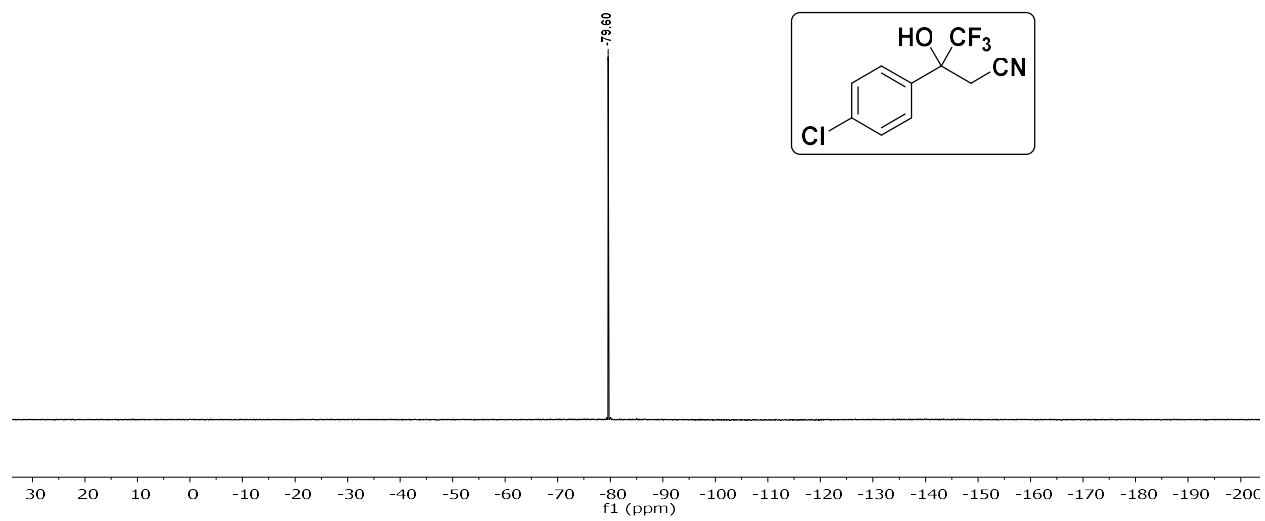

**<sup>1</sup>H NMR spectrum of 3-(4-bromophenyl)-4,4,4-trifluoro-3-hydroxybutanenitrile (3g).**

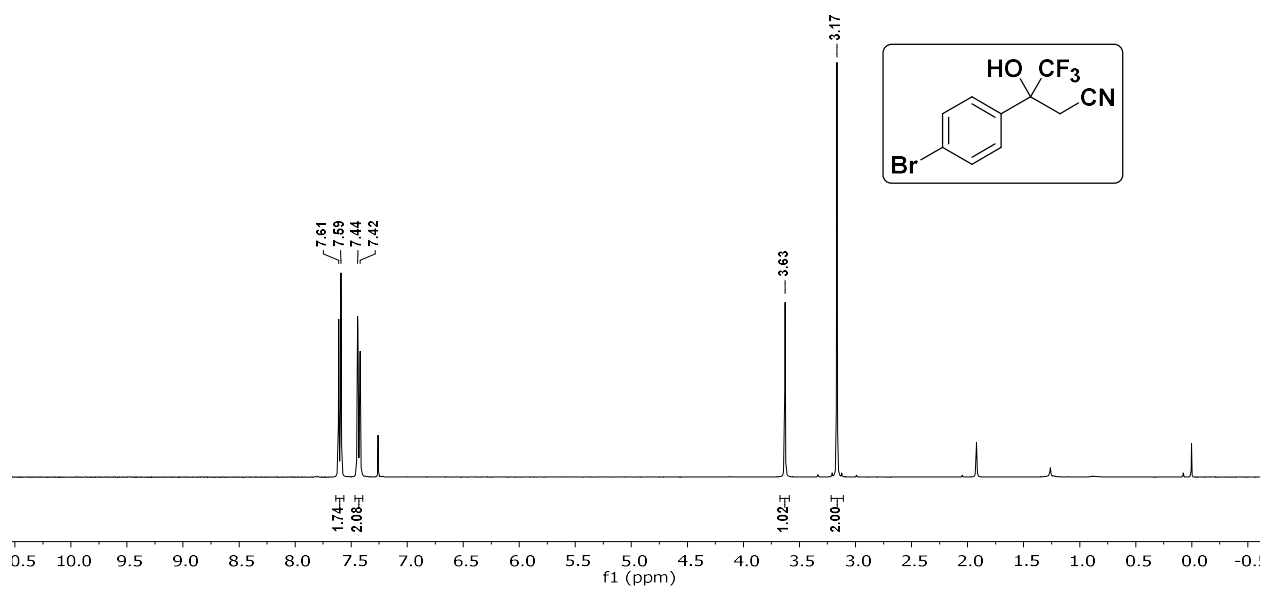

**<sup>13</sup>C NMR spectrum of 3-(4-bromophenyl)-4,4,4-trifluoro-3-hydroxybutanenitrile (3g).**

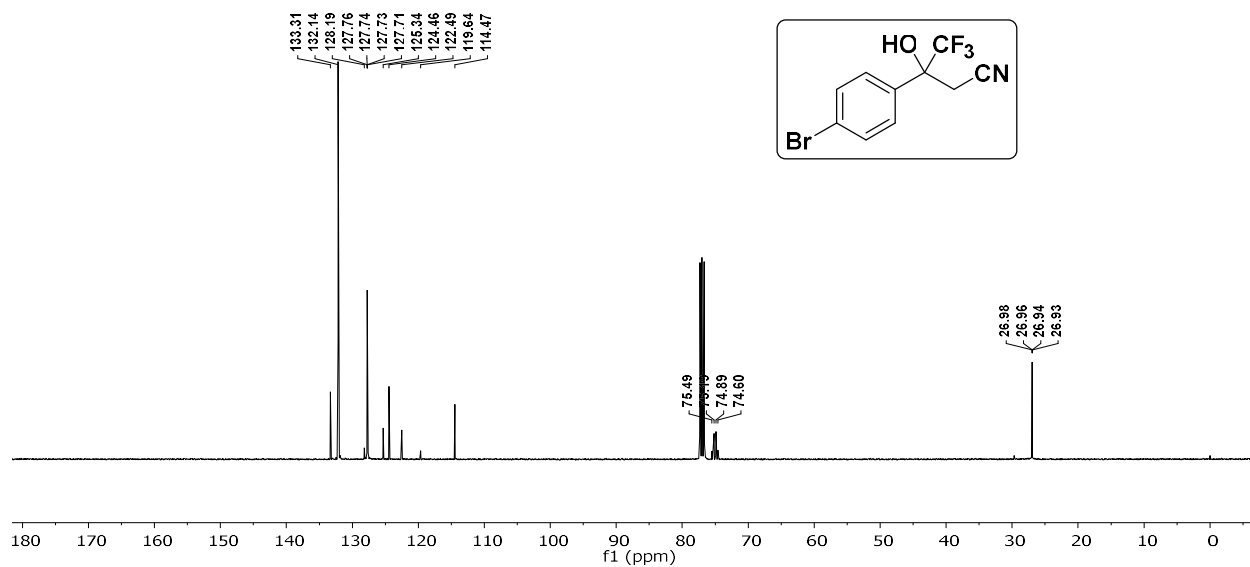

**$^{19}\text{F}$  NMR spectrum of 3-(4-bromophenyl)-4,4,4-trifluoro-3-hydroxybutanenitrile (3g).**

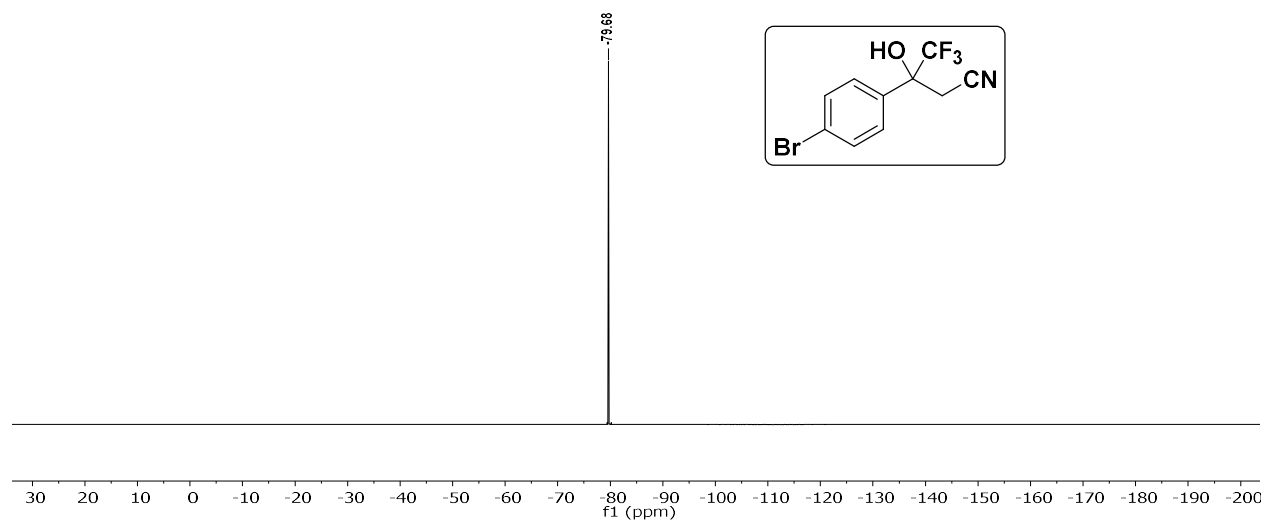

**$^1\text{H}$  NMR spectrum of 4-(3-cyano-1,1,1-trifluoro-2-hydroxypropan-2-yl)benzonitrile (3h).**

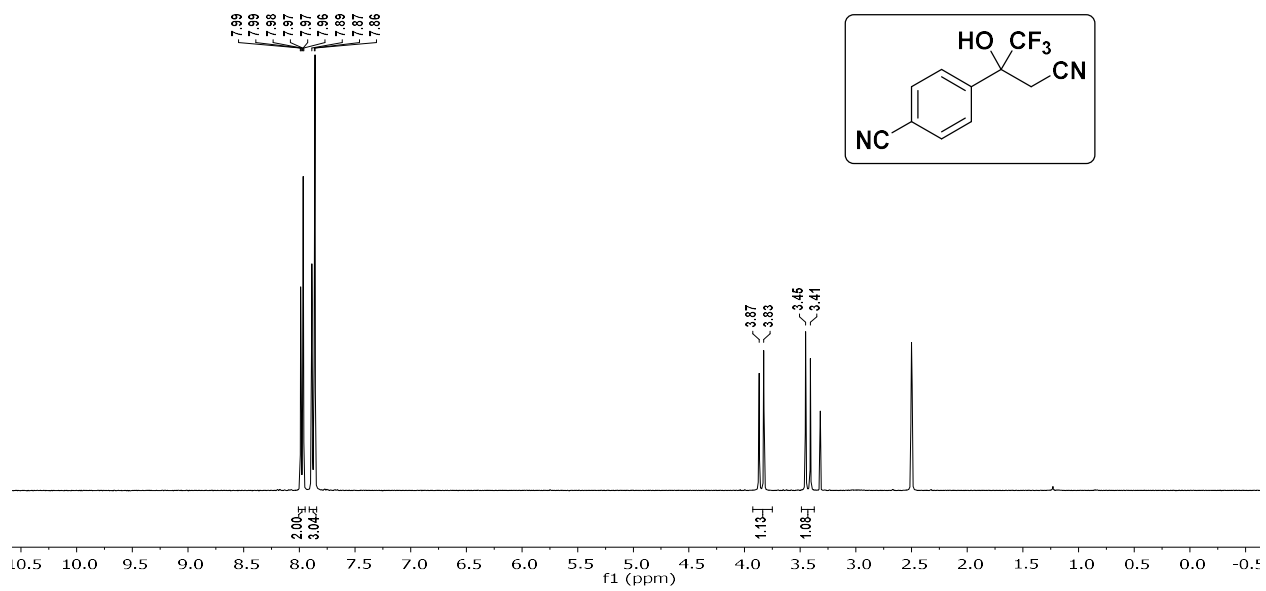

**<sup>13</sup>C NMR spectrum of 4-(3-cyano-1,1,1-trifluoro-2-hydroxypropan-2-yl)benzonitrile (3h).**

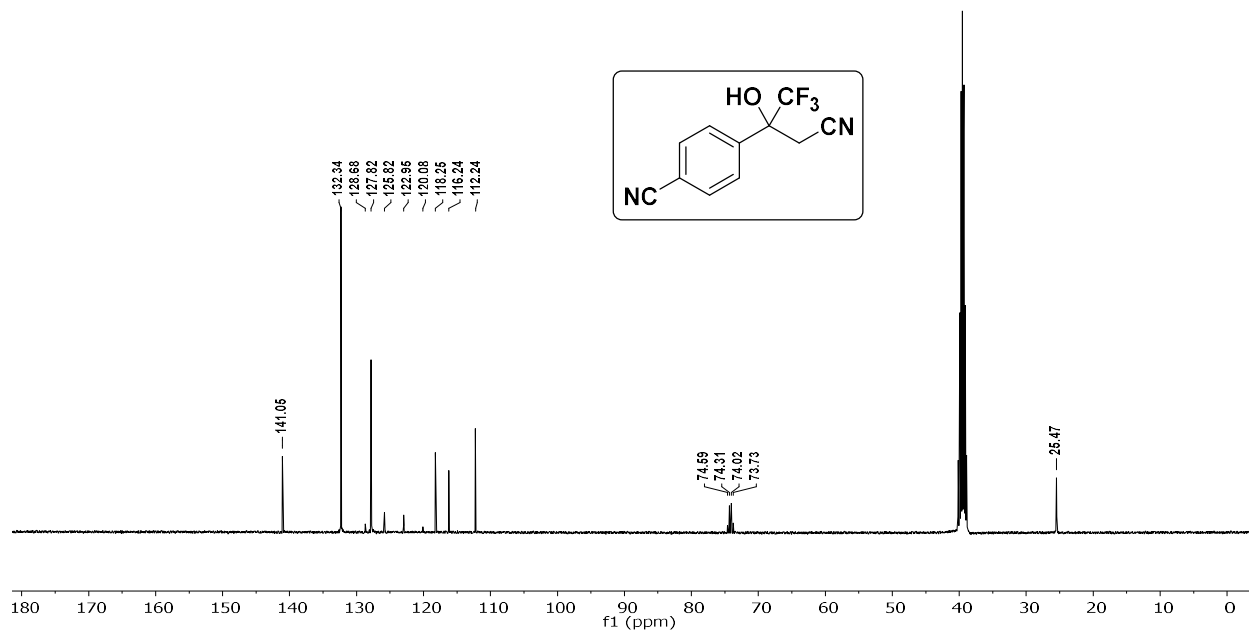

**<sup>19</sup>F NMR spectrum of 4-(3-cyano-1,1,1-trifluoro-2-hydroxypropan-2-yl)benzonitrile (3h).**

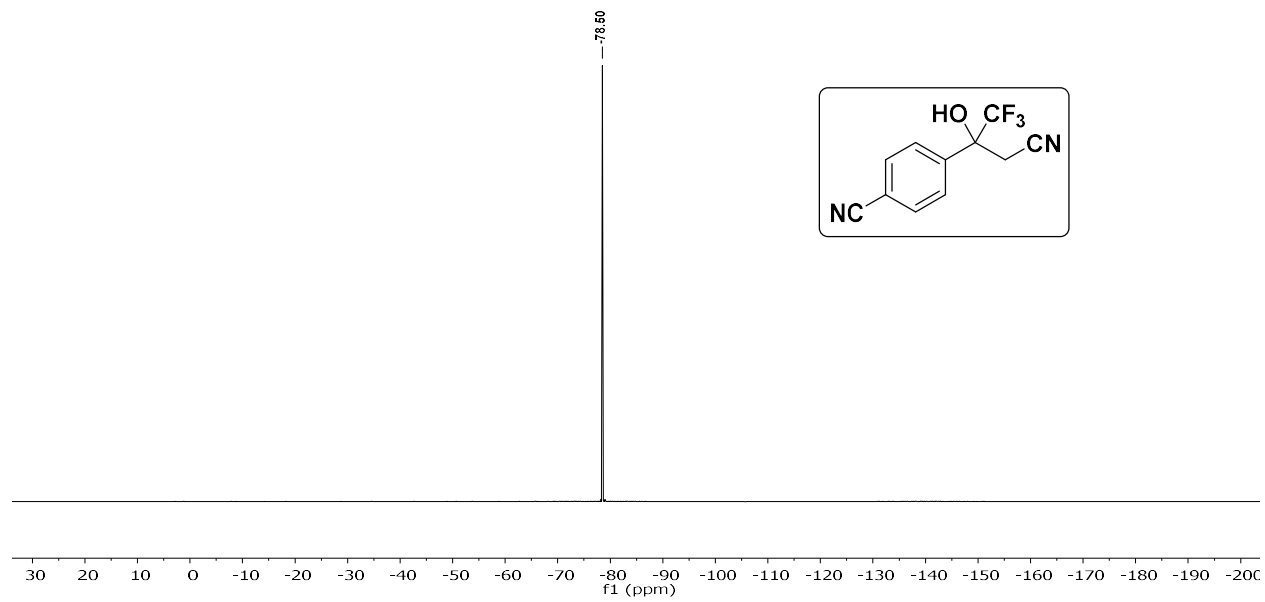

**<sup>1</sup>H NMR spectrum of 4,4,4-trifluoro-3-hydroxy-3-(4-(trifluoromethyl)phenyl)butanenitrile (3i).**

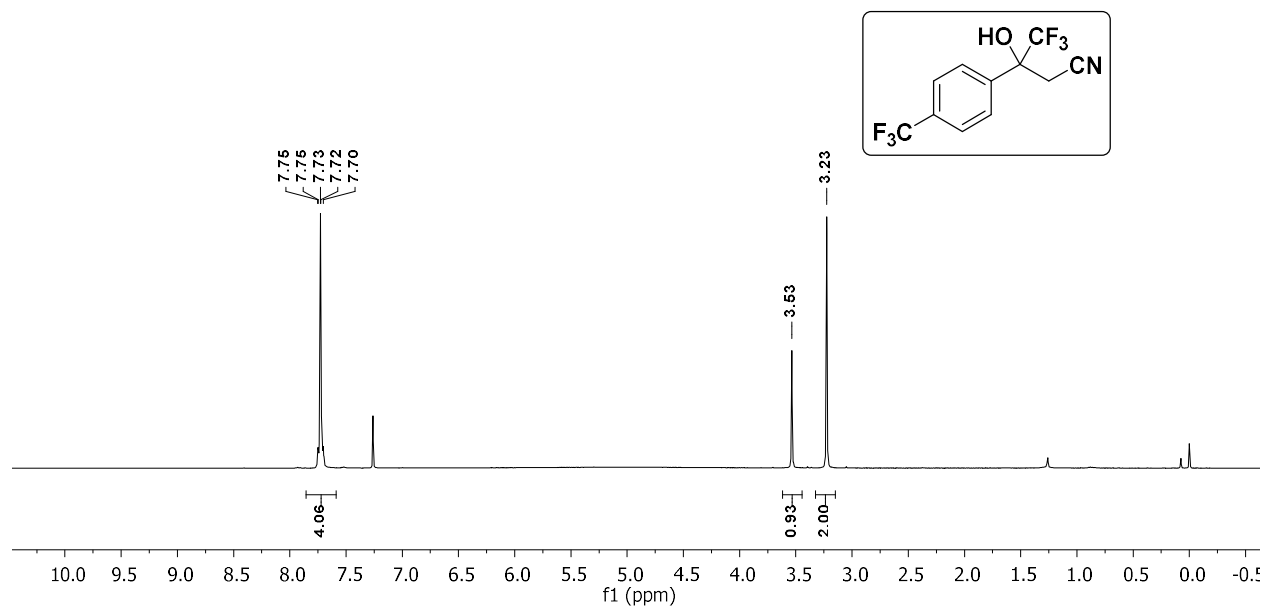

**<sup>13</sup>C NMR spectrum of 4,4,4-trifluoro-3-hydroxy-3-(4-(trifluoromethyl)phenyl)butanenitrile (3i).**

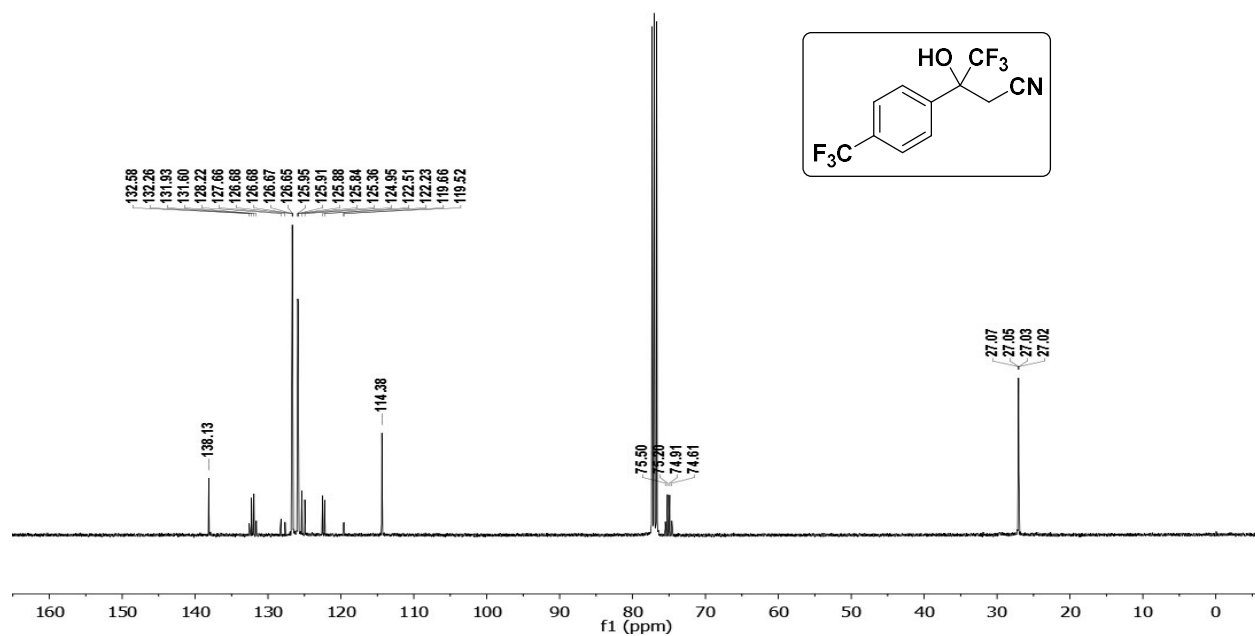

**<sup>19</sup>F NMR spectrum of 4,4,4-trifluoro-3-hydroxy-3-(4-(trifluoromethyl)phenyl)butanenitrile (3i).**

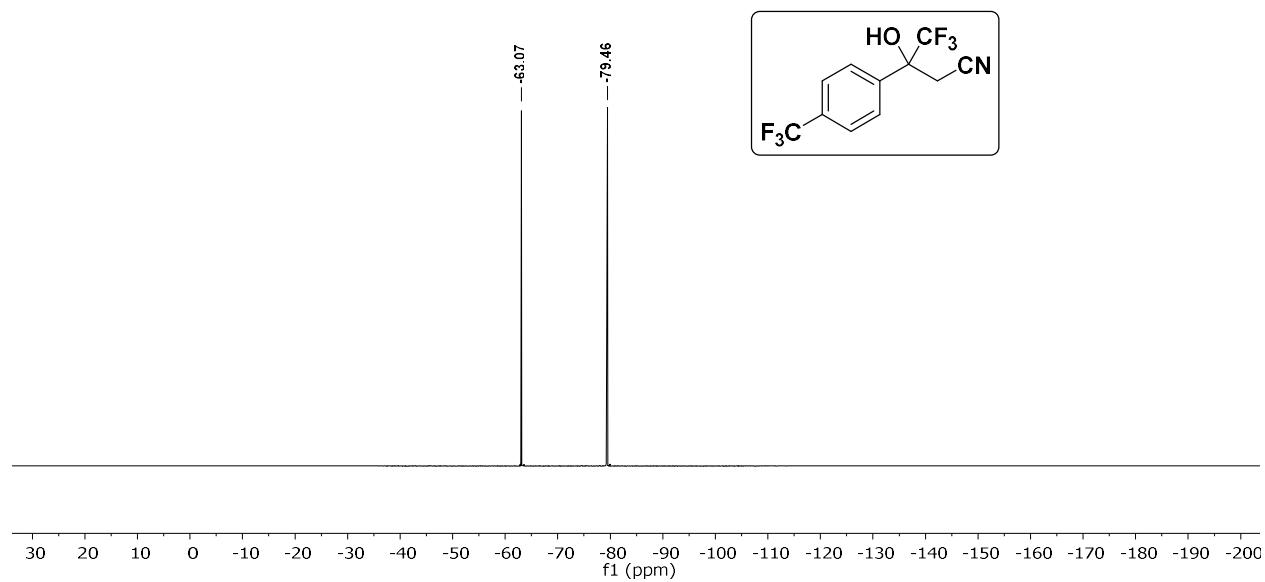

**<sup>1</sup>H NMR spectrum of ethyl 4-(3-cyano-1,1,1-trifluoro-2-hydroxypropan-2-yl)benzoate (3j).**

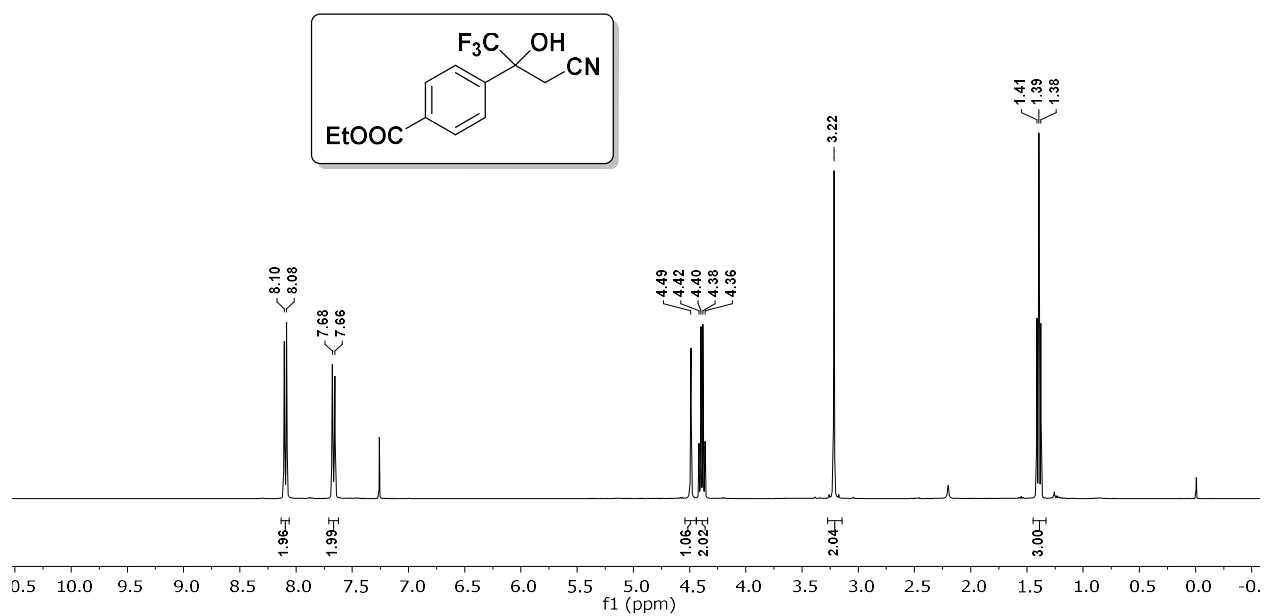

**$^{13}\text{C}$  NMR spectrum of ethyl 4-(3-cyano-1,1,1-trifluoro-2-hydroxypropan-2-yl)benzoate (3j).**

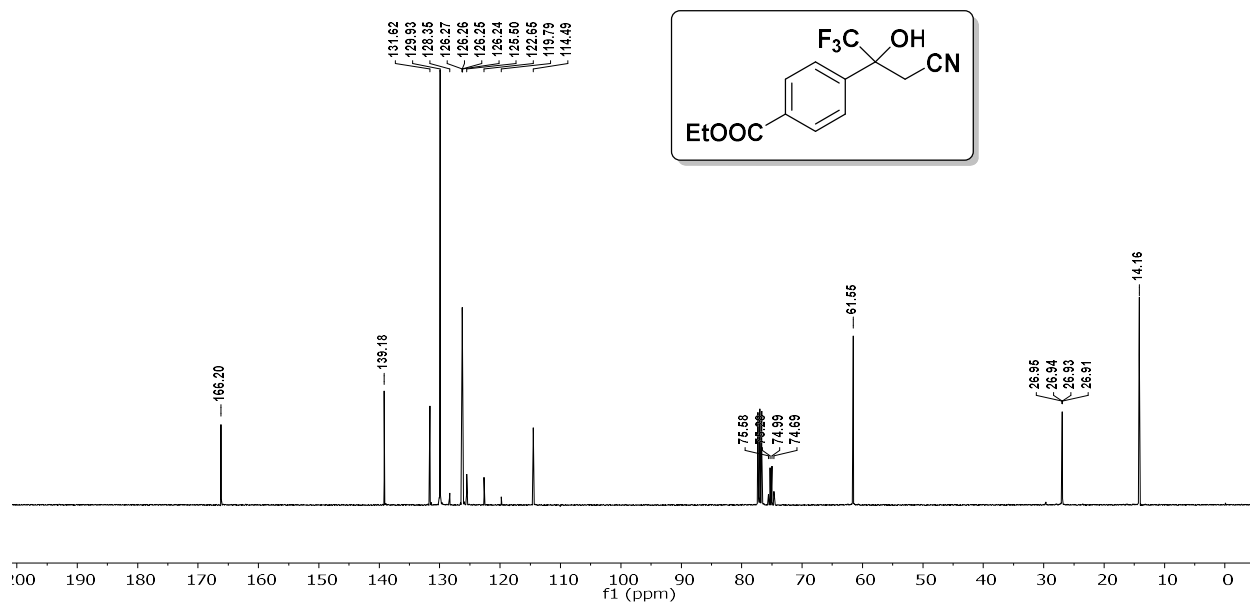

**$^{19}\text{F}$  NMR spectrum of ethyl 4-(3-cyano-1,1,1-trifluoro-2-hydroxypropan-2-yl)benzoate (3j).**

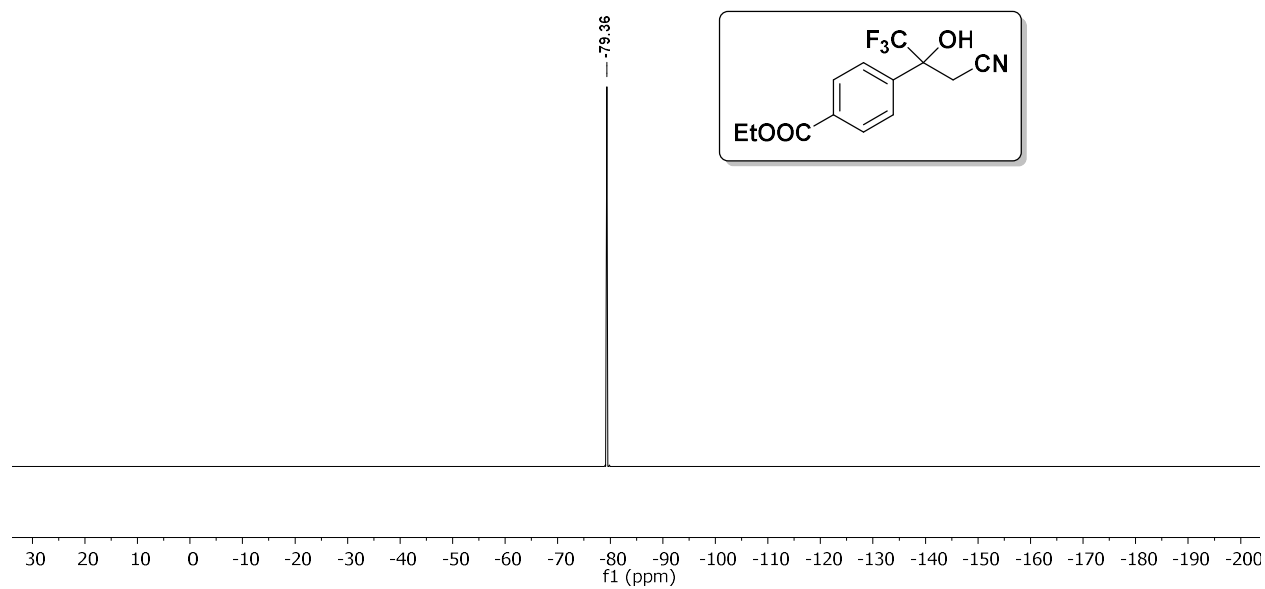



**<sup>1</sup>H NMR spectrum of 3-(4-(dimethylamino)phenyl)-4,4,4-trifluoro-3-hydroxybutanenitrile (3k).**

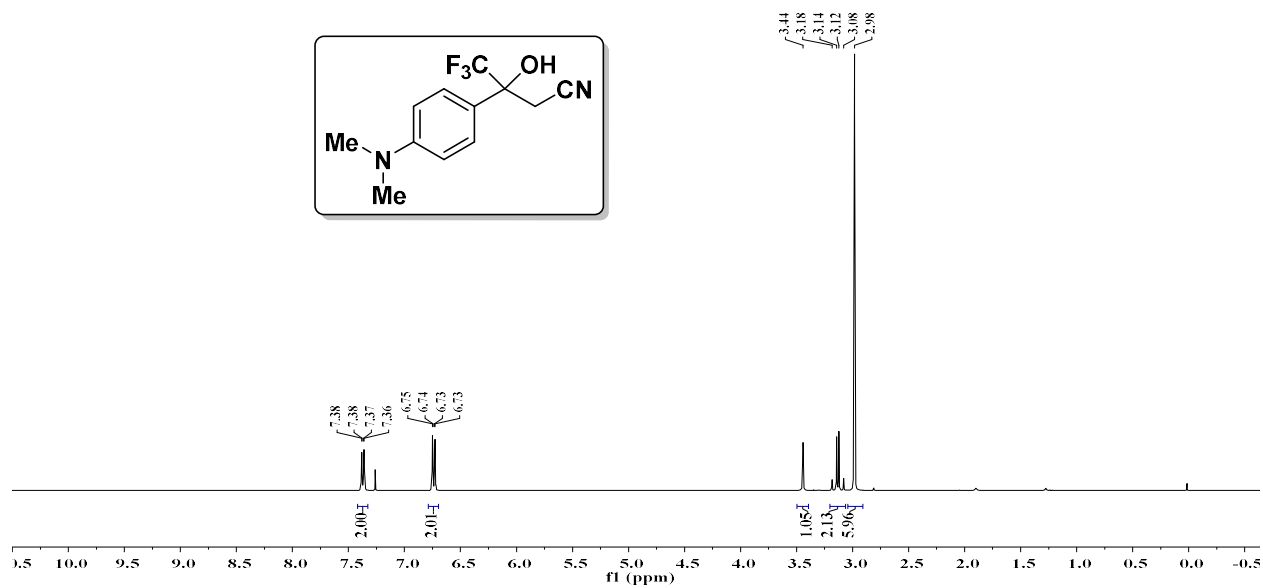

**<sup>13</sup>C NMR spectrum of 3-(4-(dimethylamino)phenyl)-4,4,4-trifluoro-3-hydroxybutanenitrile (3k).**

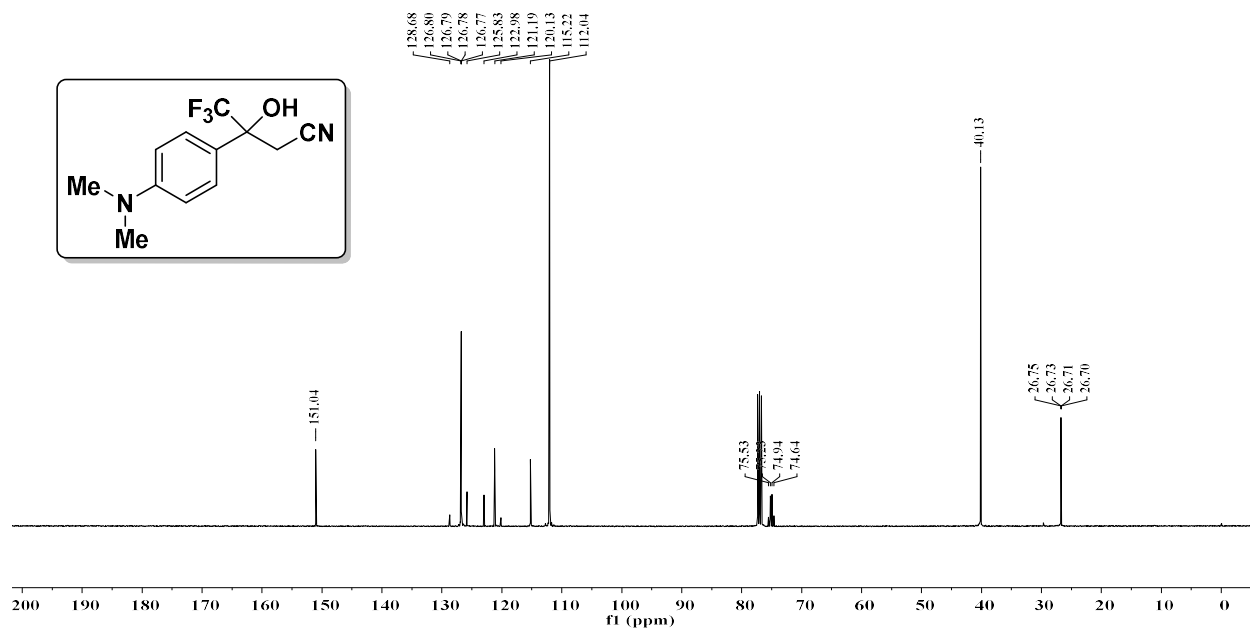

**<sup>19</sup>F NMR spectrum of 3-(4-(dimethylamino)phenyl)-4,4,4-trifluoro-3-hydroxybutanenitrile (3k).**

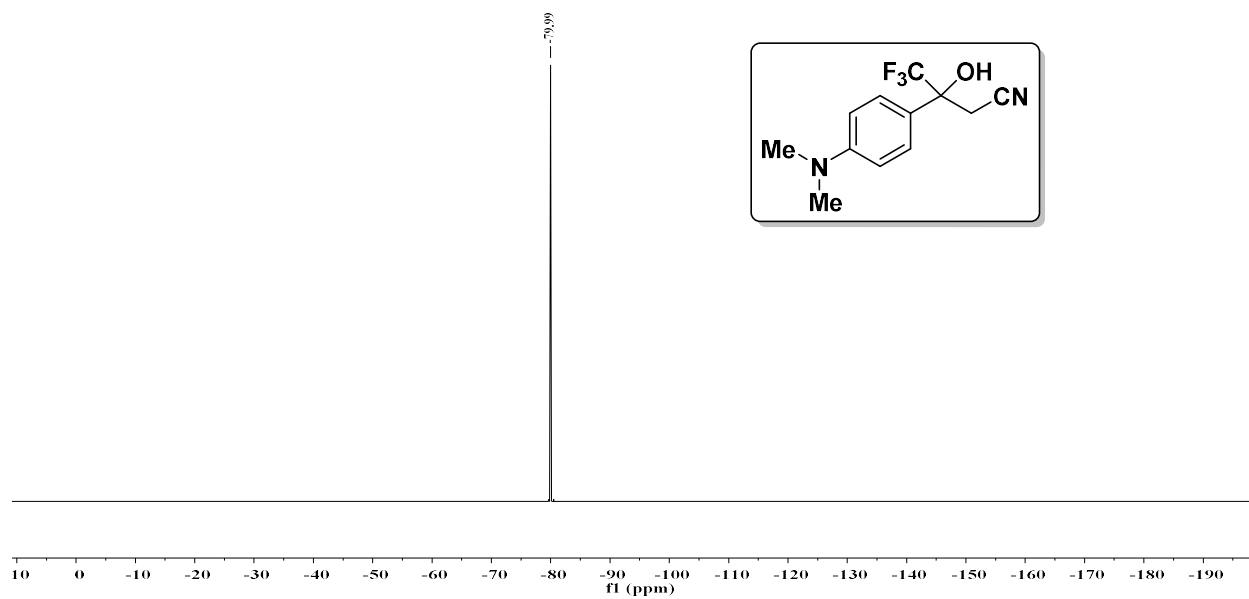

**<sup>1</sup>H NMR spectrum of 4,4,4-trifluoro-3-hydroxy-3-(4-methoxyphenyl)butanenitrile (3l).**

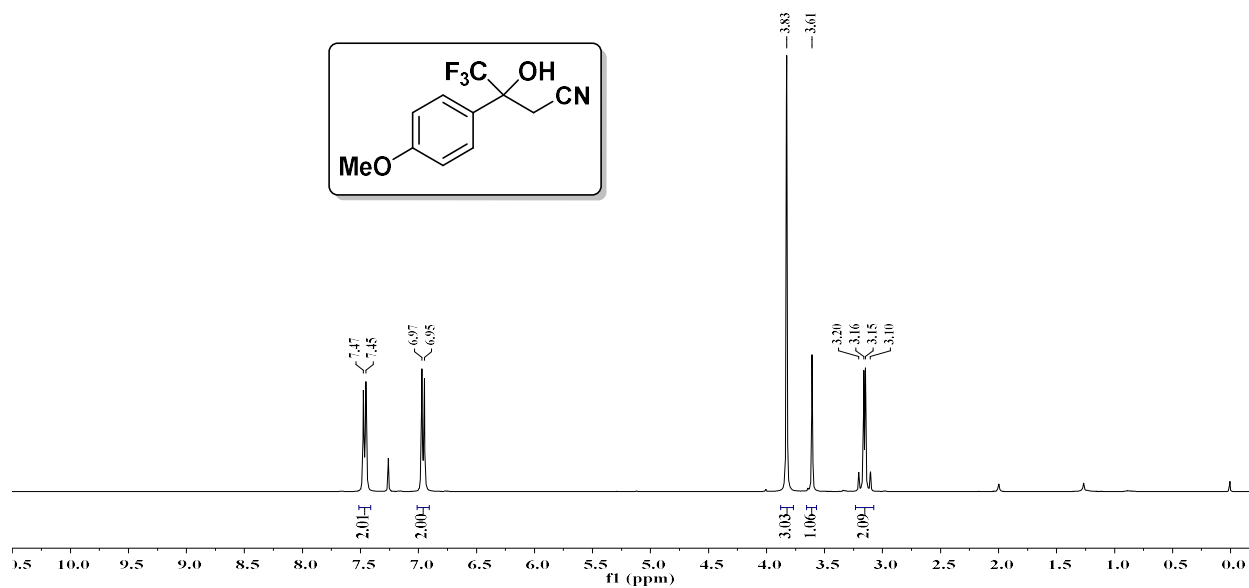

**<sup>13</sup>C NMR spectrum of 4,4,4-trifluoro-3-hydroxy-3-(4-methoxyphenyl)butanenitrile (3l).**

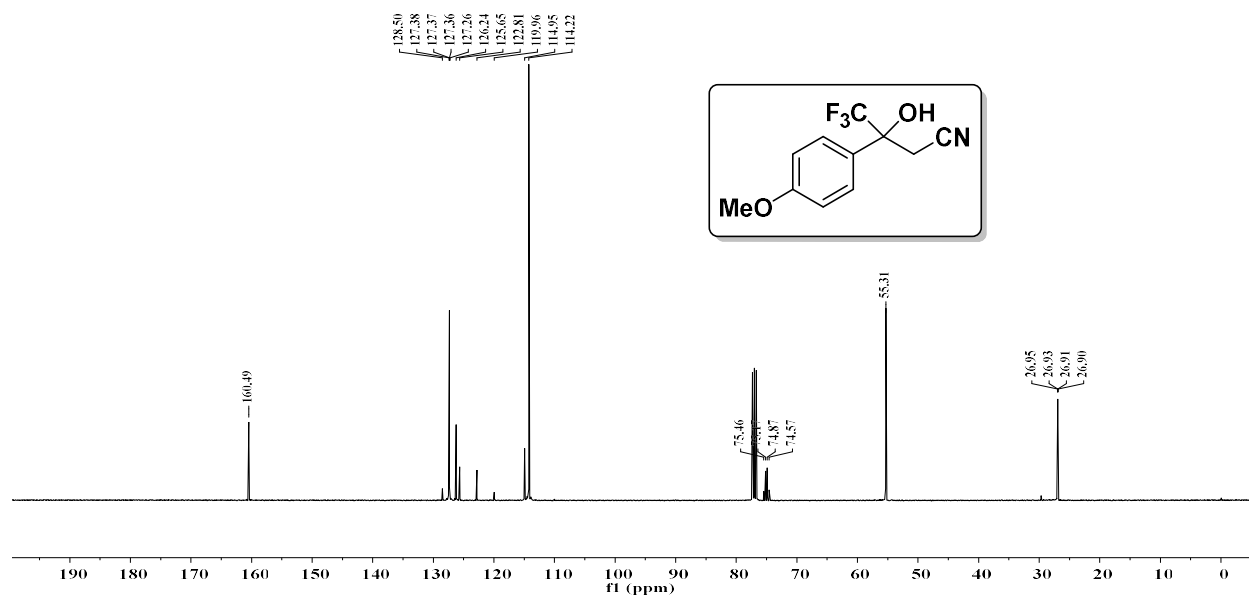

**<sup>19</sup>F NMR spectrum of 4,4,4-trifluoro-3-hydroxy-3-(4-methoxyphenyl)butanenitrile (3l).**

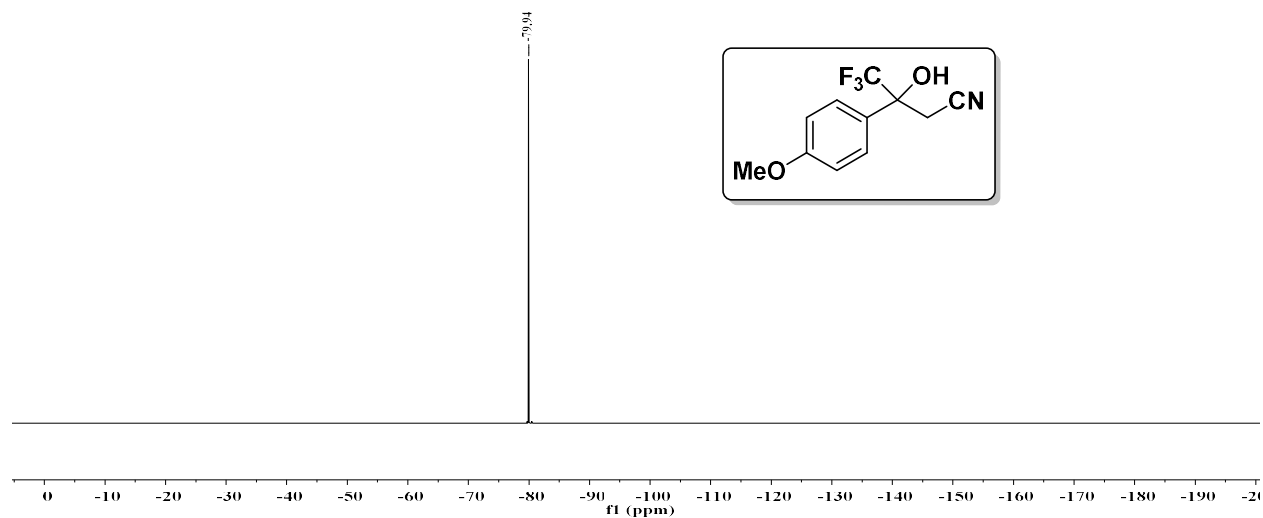

**<sup>1</sup>H NMR spectrum of 4,4,4-trifluoro-3-hydroxy-3-(thiophen-2-yl)butanenitrile (3m).**

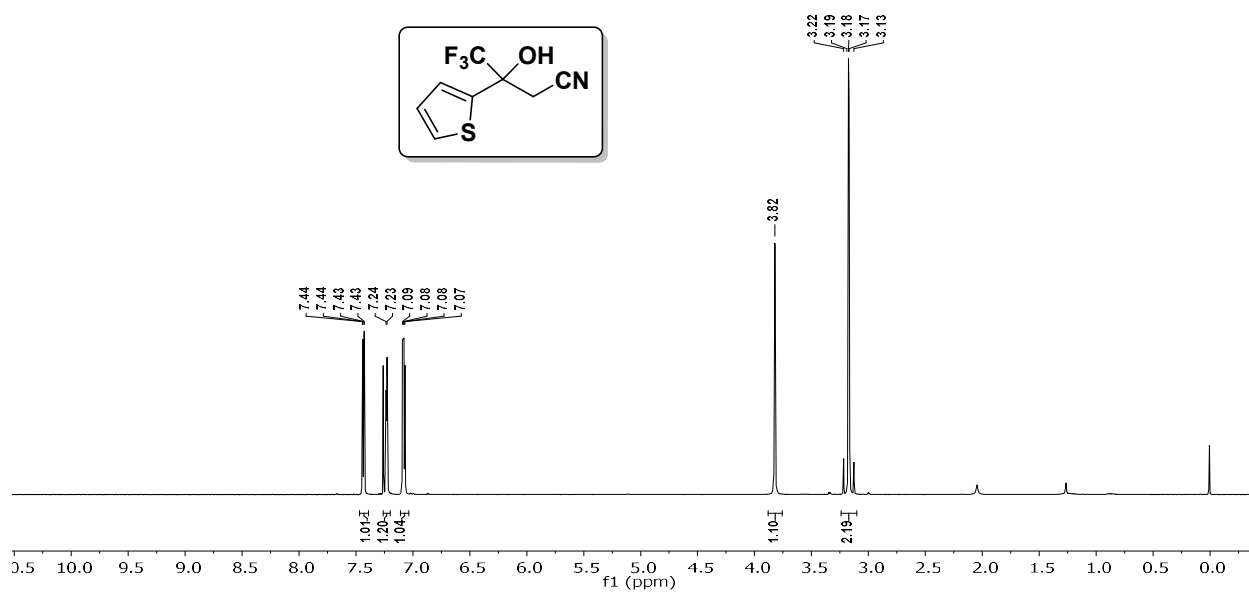

**<sup>13</sup>C NMR spectrum of 4,4,4-trifluoro-3-hydroxy-3-(thiophen-2-yl)butanenitrile (3m).**

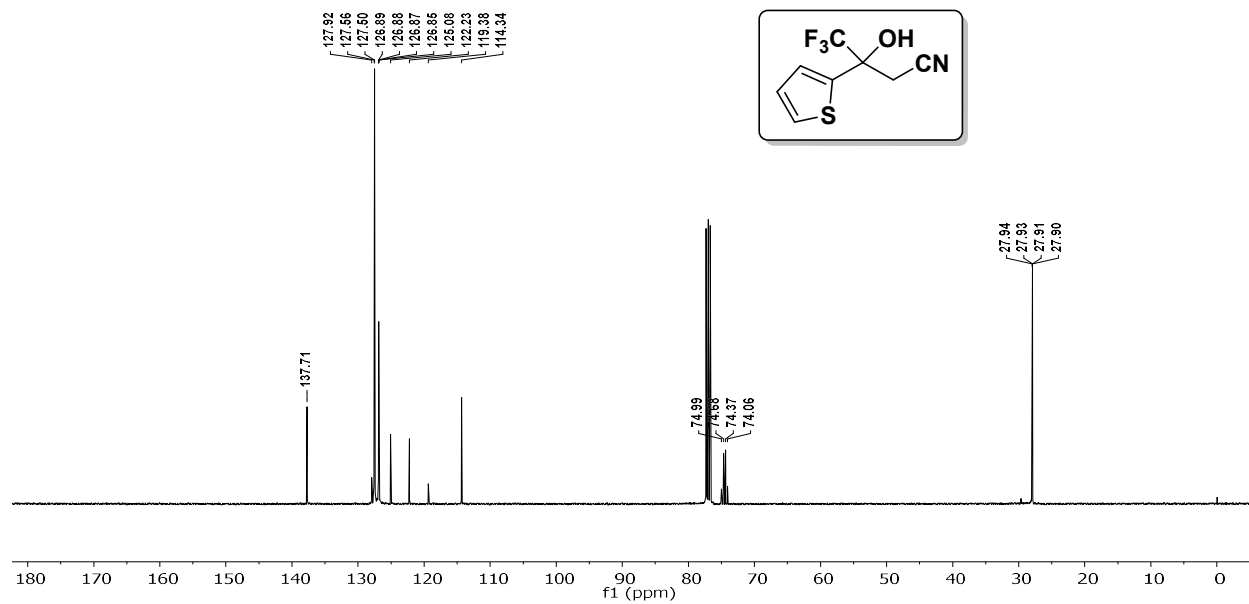

**$^{19}\text{F}$  NMR spectrum of 4,4,4-trifluoro-3-hydroxy-3-(thiophen-2-yl)butanenitrile (3m).**

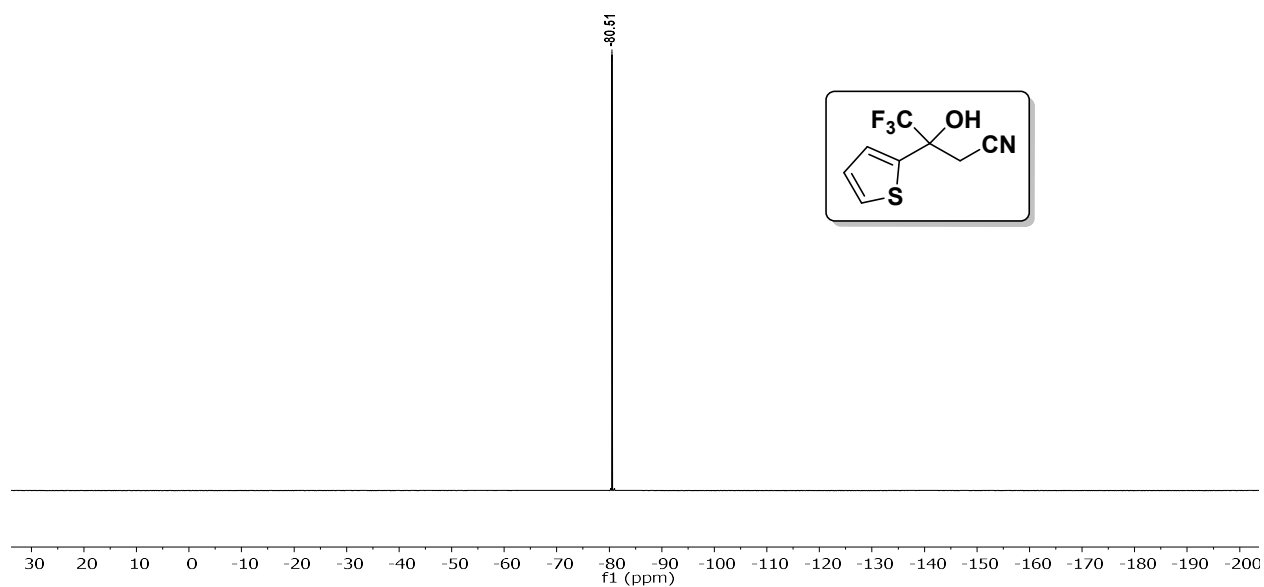

**$^1\text{H}$  NMR spectrum of 3-cyclohexyl-4,4,4-trifluoro-3-hydroxybutanenitrile (3n).**

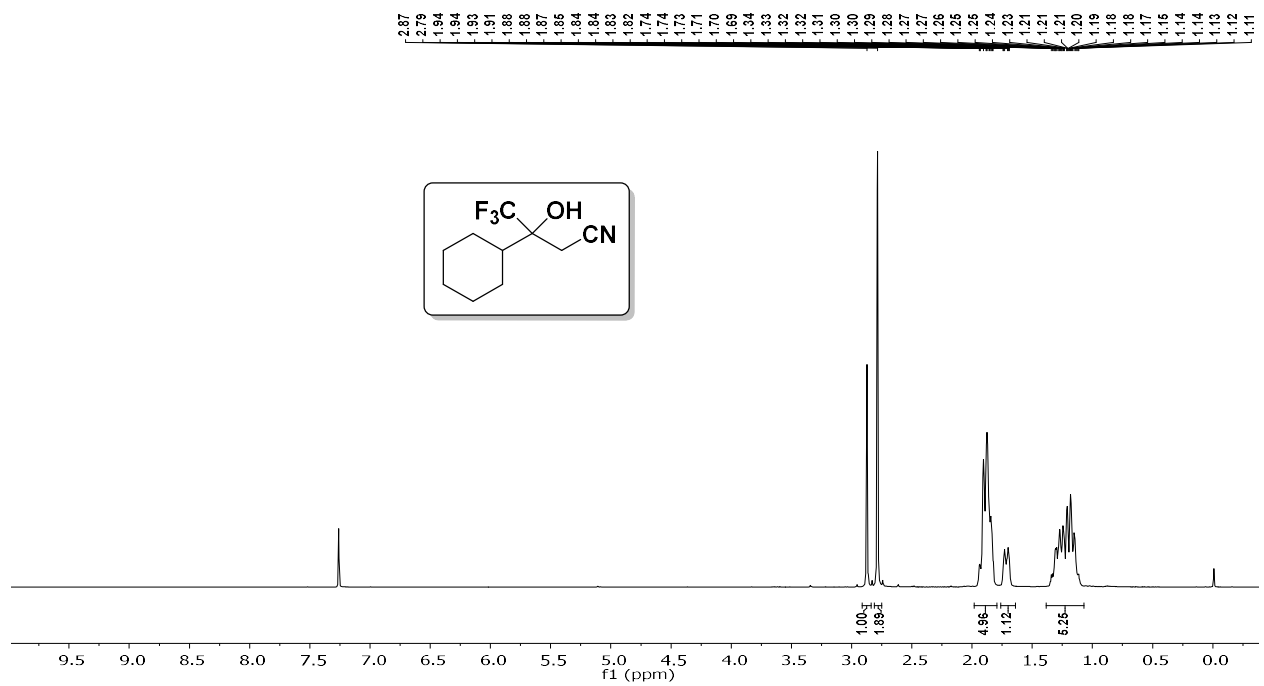

**$^{13}\text{C}$  NMR spectrum of 3-cyclohexyl-4,4,4-trifluoro-3-hydroxybutanenitrile (3n).**

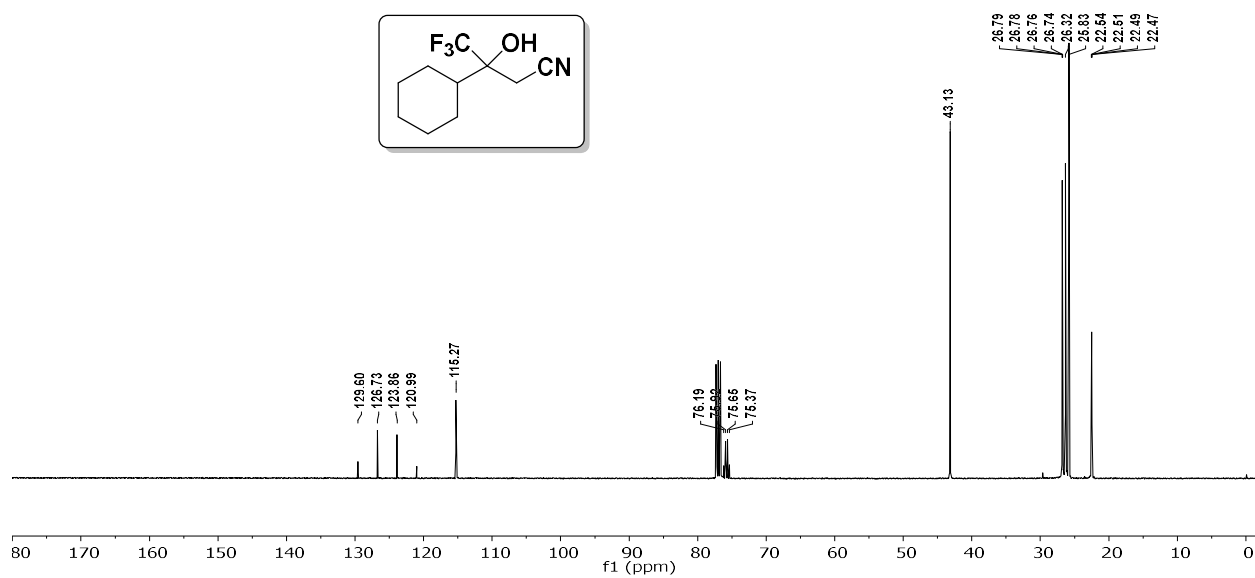

**$^{19}\text{F}$  NMR spectrum of 3-cyclohexyl-4,4,4-trifluoro-3-hydroxybutanenitrile (3n).**

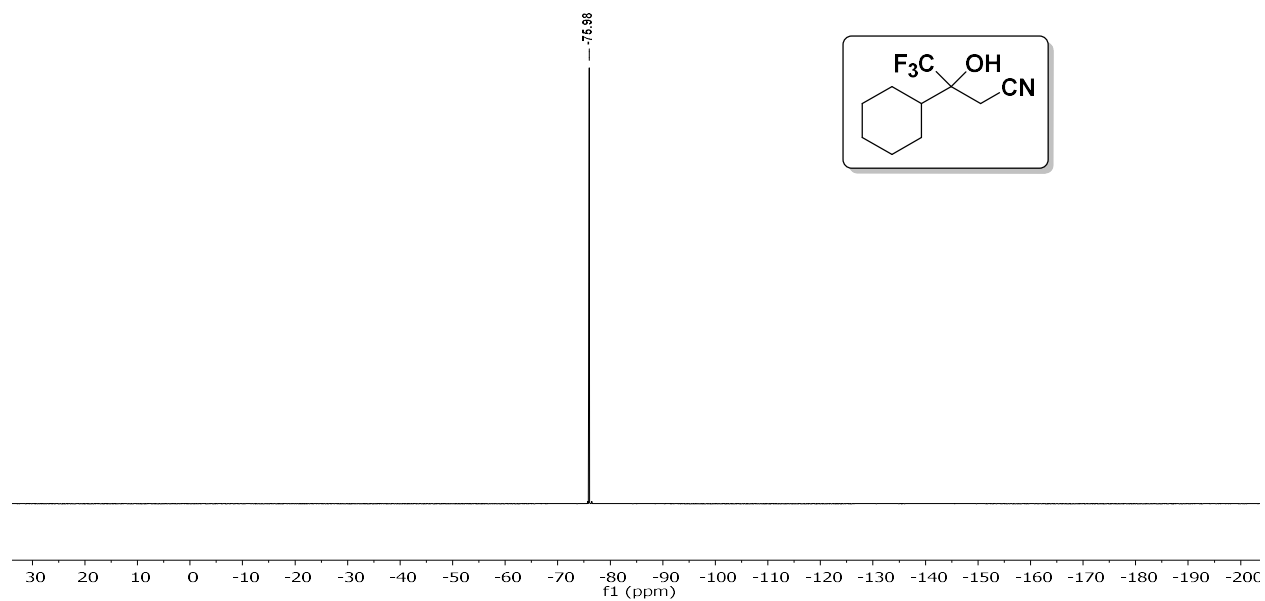

**<sup>1</sup>H NMR spectrum of 4,4-difluoro-3-hydroxy-3-phenylbutanenitrile (5a).**

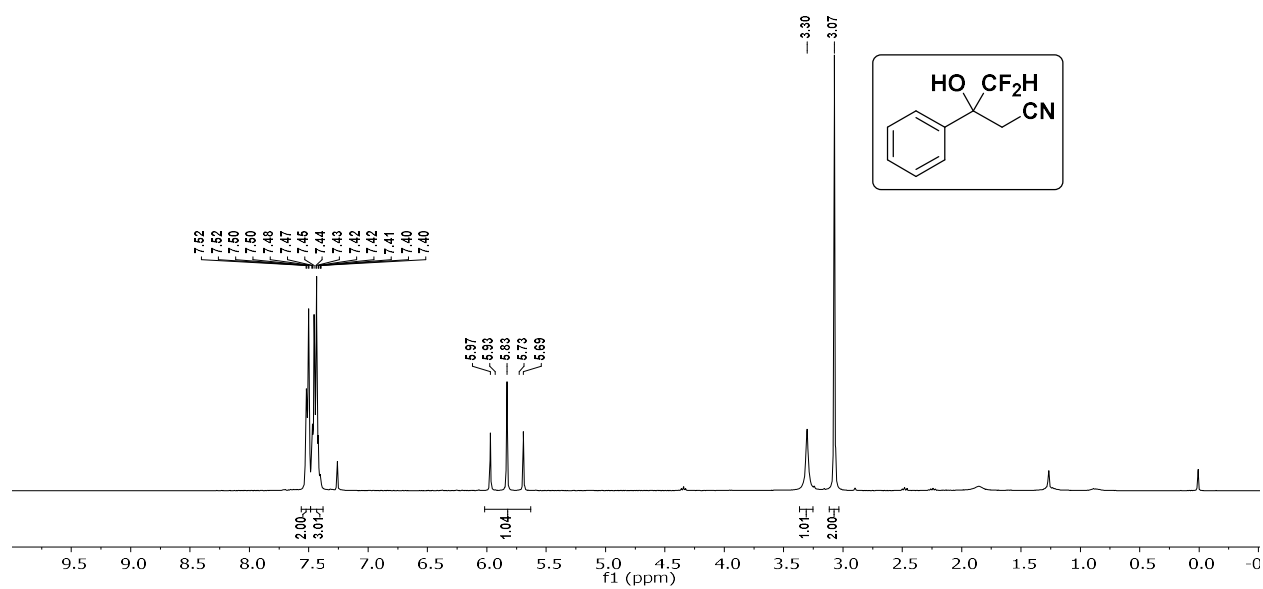

**<sup>13</sup>C NMR spectrum of 4,4-difluoro-3-hydroxy-3-phenylbutanenitrile (5a).**

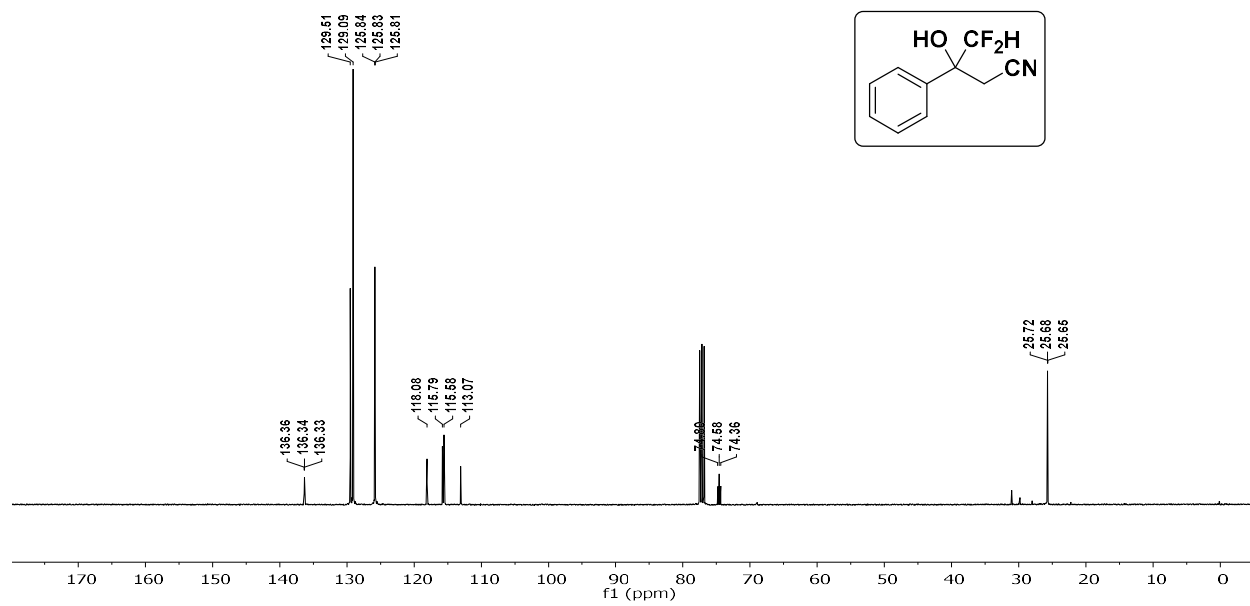

**$^{19}\text{F}$  NMR spectrum of 4,4-difluoro-3-hydroxy-3-phenylbutanenitrile (5a).**

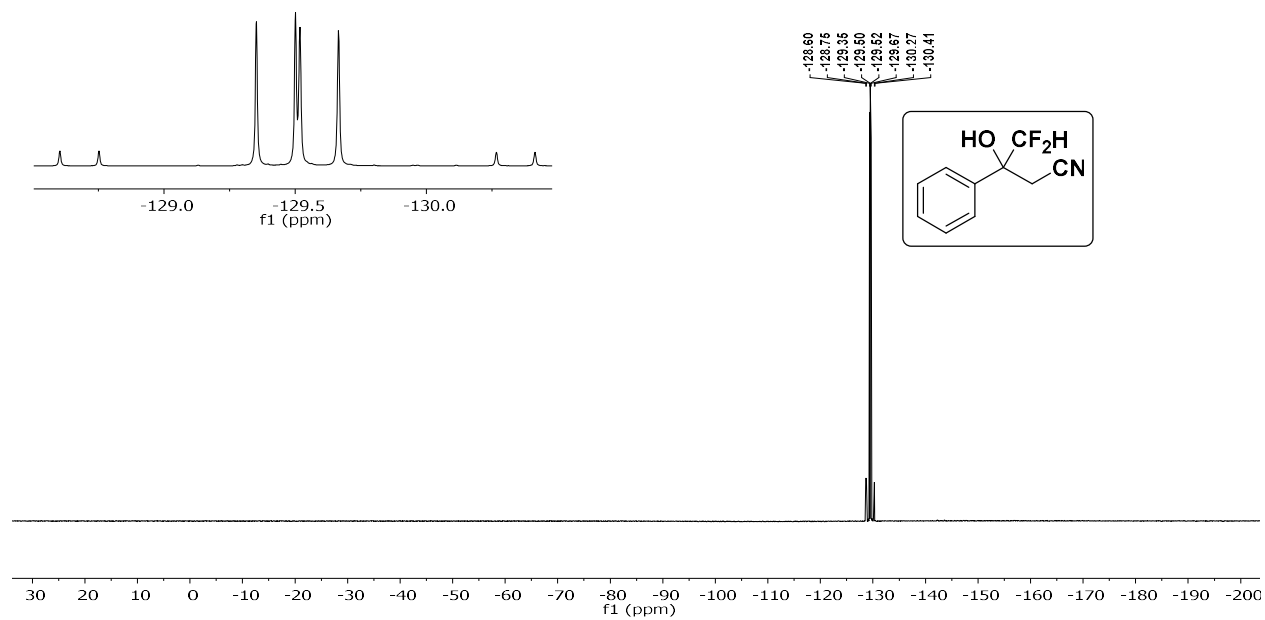

**$^1\text{H}$  NMR spectrum of 4,4-difluoro-3-hydroxy-3-(p-tolyl)butanenitrile (5b).**

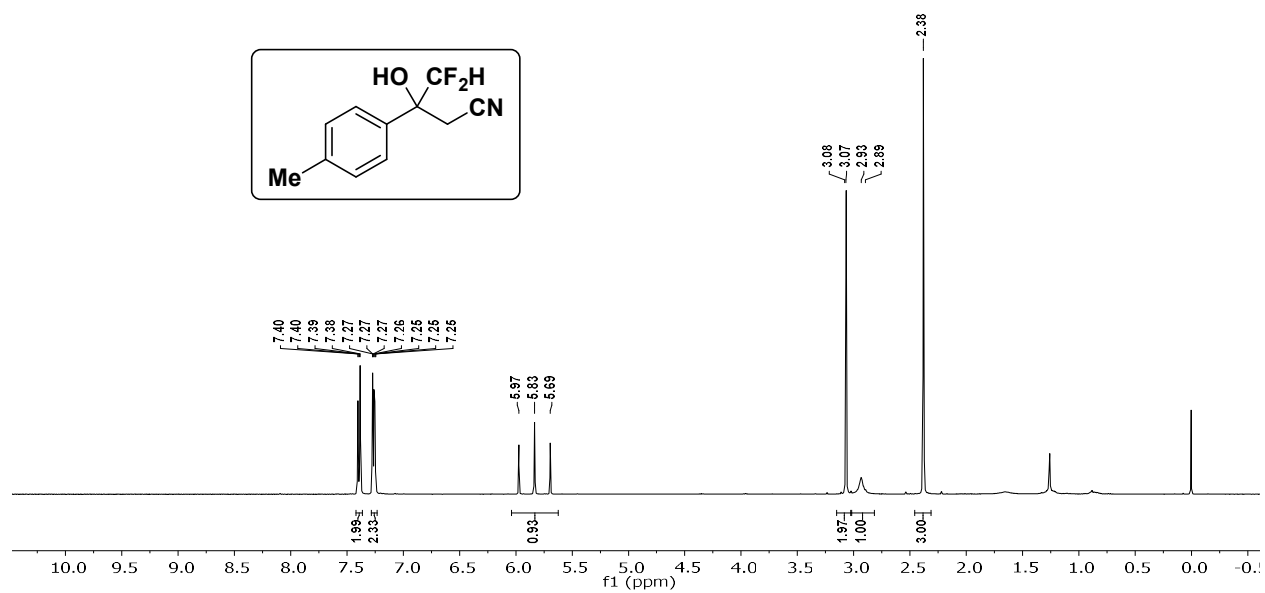



**$^{13}\text{C}$  NMR spectrum of 4,4-difluoro-3-hydroxy-3-(p-tolyl)butanenitrile (5b).**

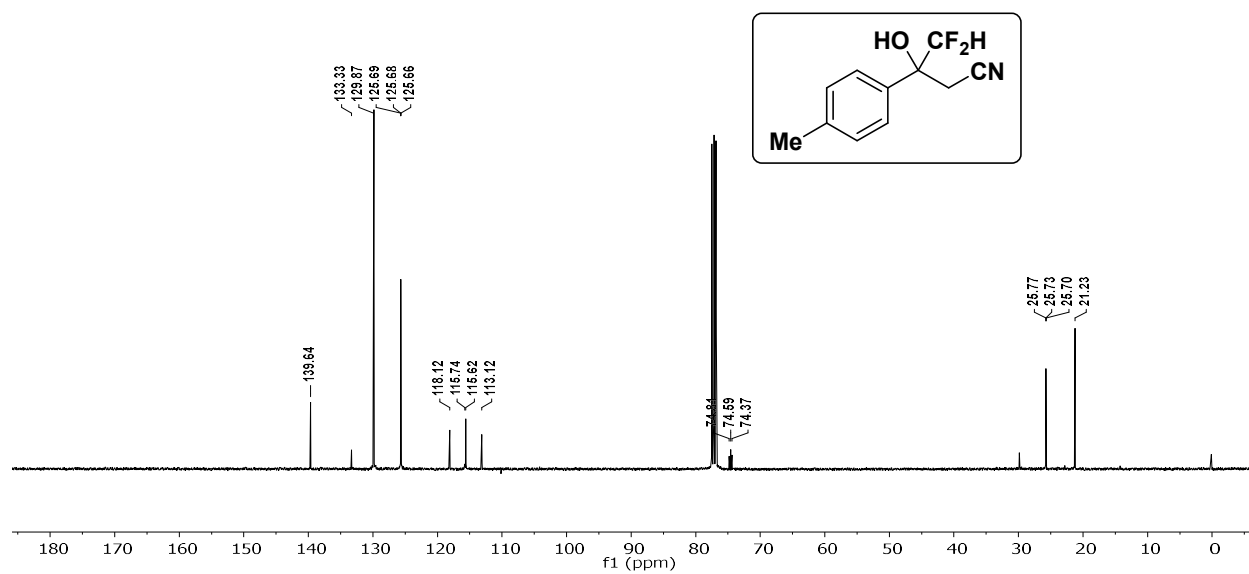

**$^{19}\text{F}$  NMR spectrum of 4,4-difluoro-3-hydroxy-3-(p-tolyl)butanenitrile (5b).**

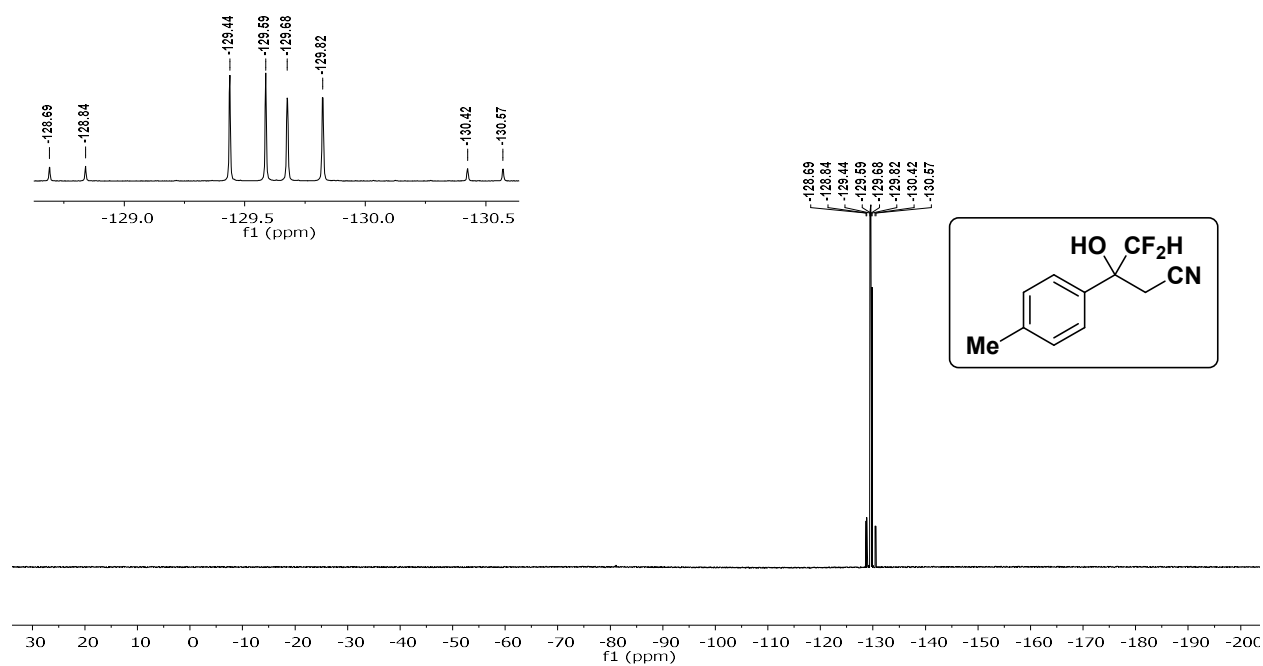

**<sup>1</sup>H NMR spectrum of 4,4-difluoro-3-hydroxy-3-(naphthalen-2-yl)butanenitrile (5c).**

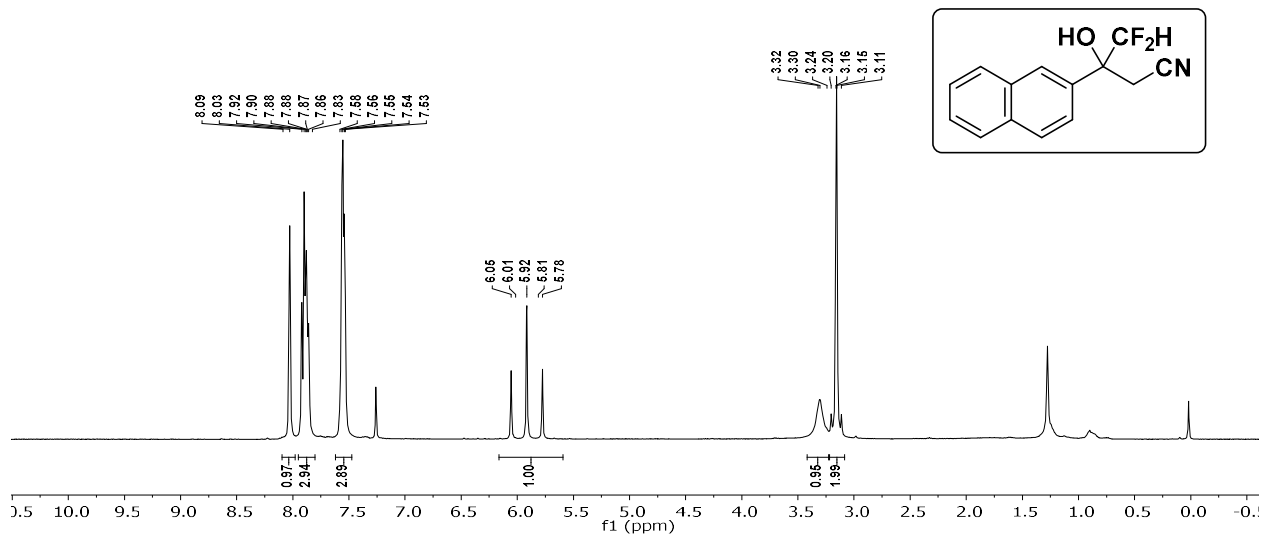

**<sup>13</sup>C NMR spectrum of 4,4-difluoro-3-hydroxy-3-(naphthalen-2-yl)butanenitrile (5c).**

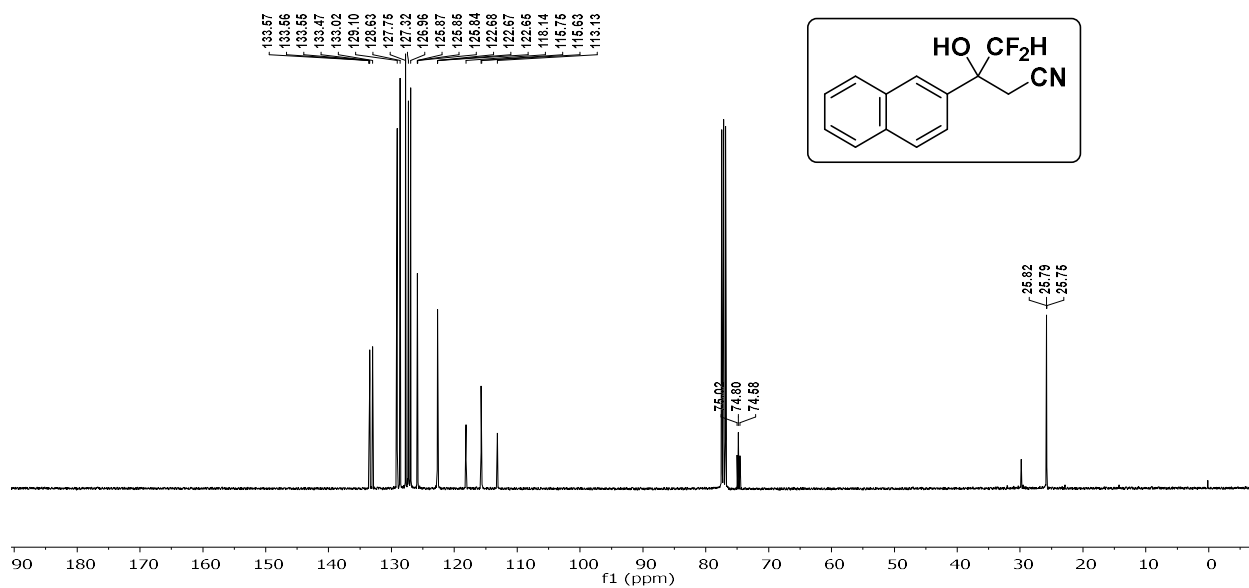

**$^{19}\text{F}$  NMR spectrum of 4,4-difluoro-3-hydroxy-3-(naphthalen-2-yl)butanenitrile (5c).**

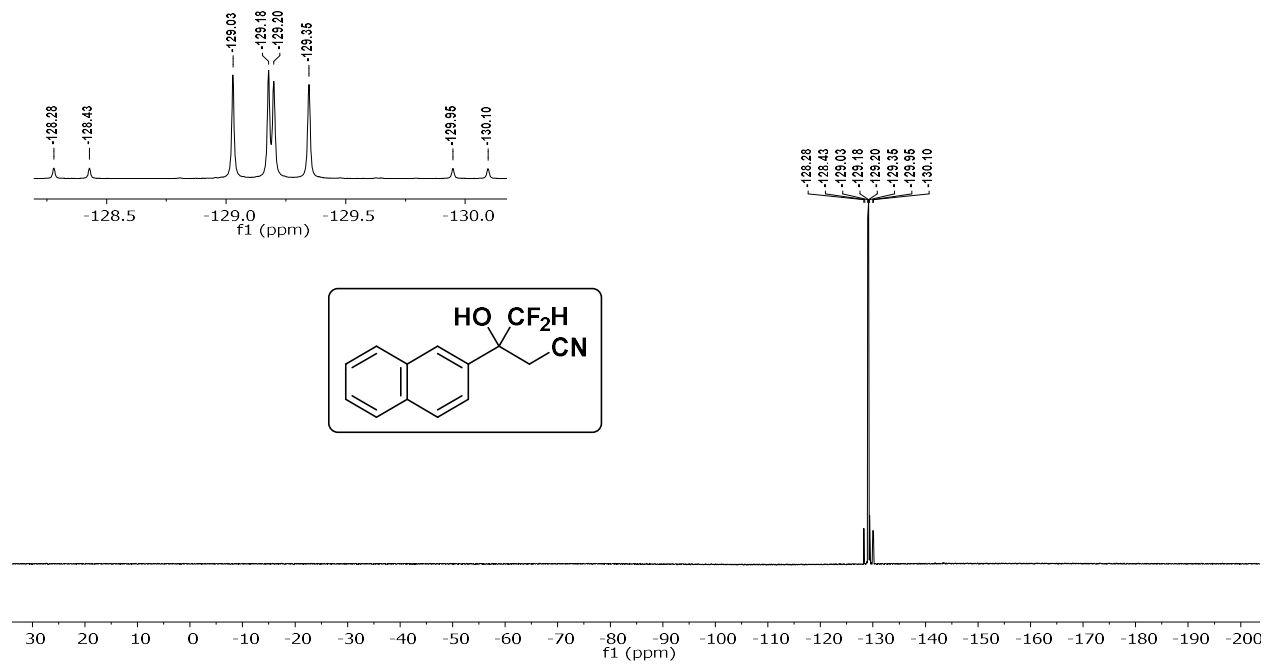

**$^1\text{H}$  NMR spectrum of 4,4-difluoro-3-hydroxy-3-(2-nitrophenyl)butanenitrile (5d).**

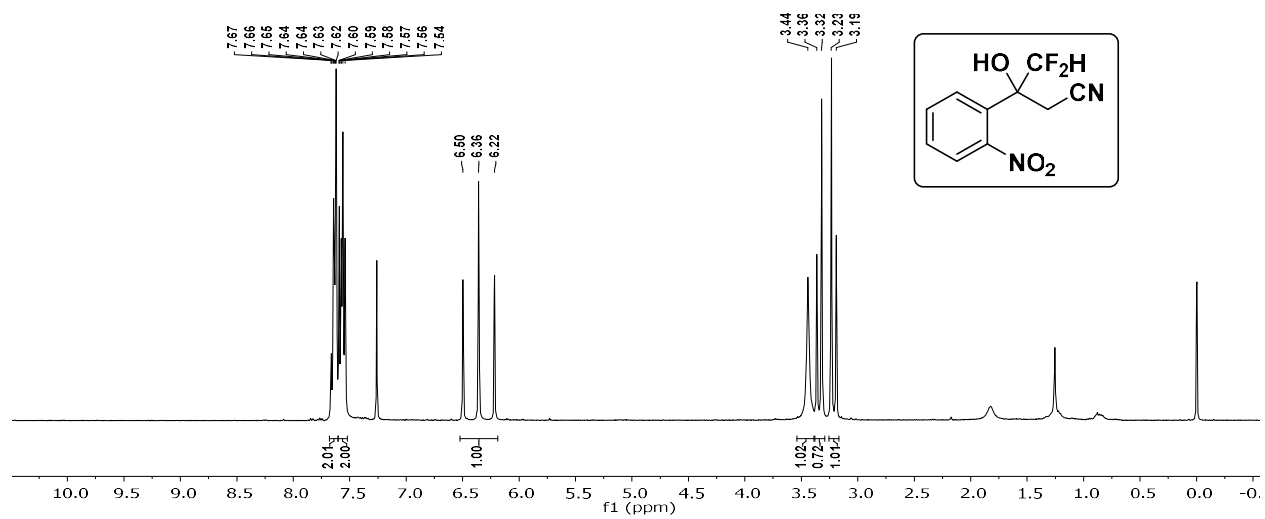

**$^{13}\text{C}$  NMR spectrum of 4,4-difluoro-3-hydroxy-3-(2-nitrophenyl)butanenitrile (5d).**

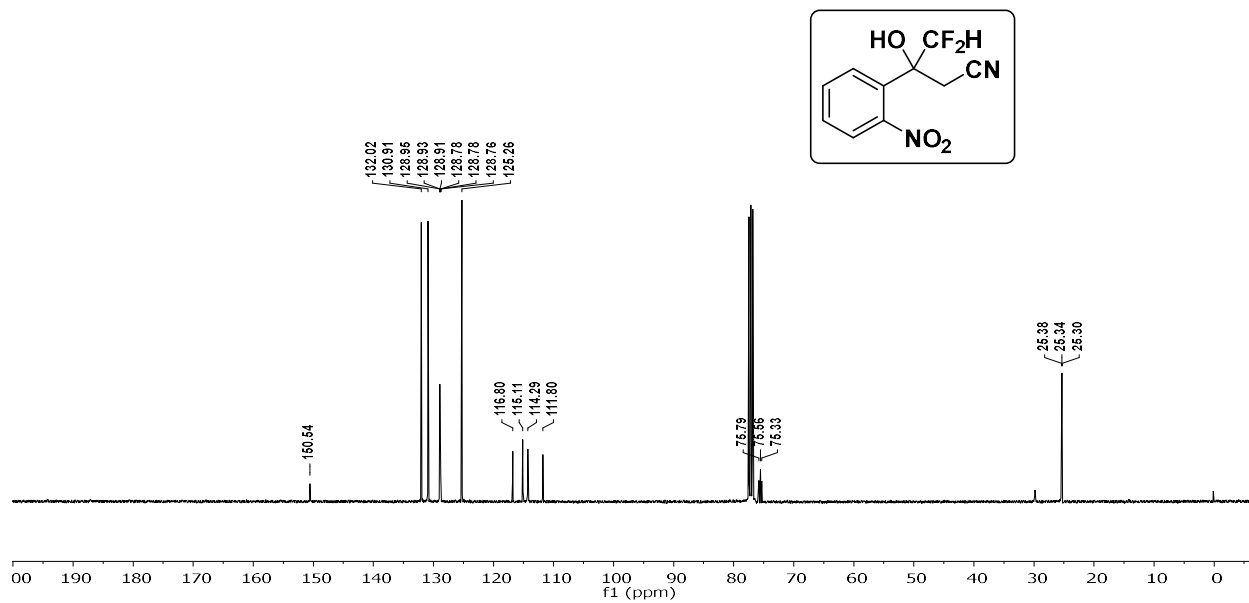

**$^{19}\text{F}$  NMR spectrum of 4,4-difluoro-3-hydroxy-3-(2-nitrophenyl)butanenitrile (5d).**

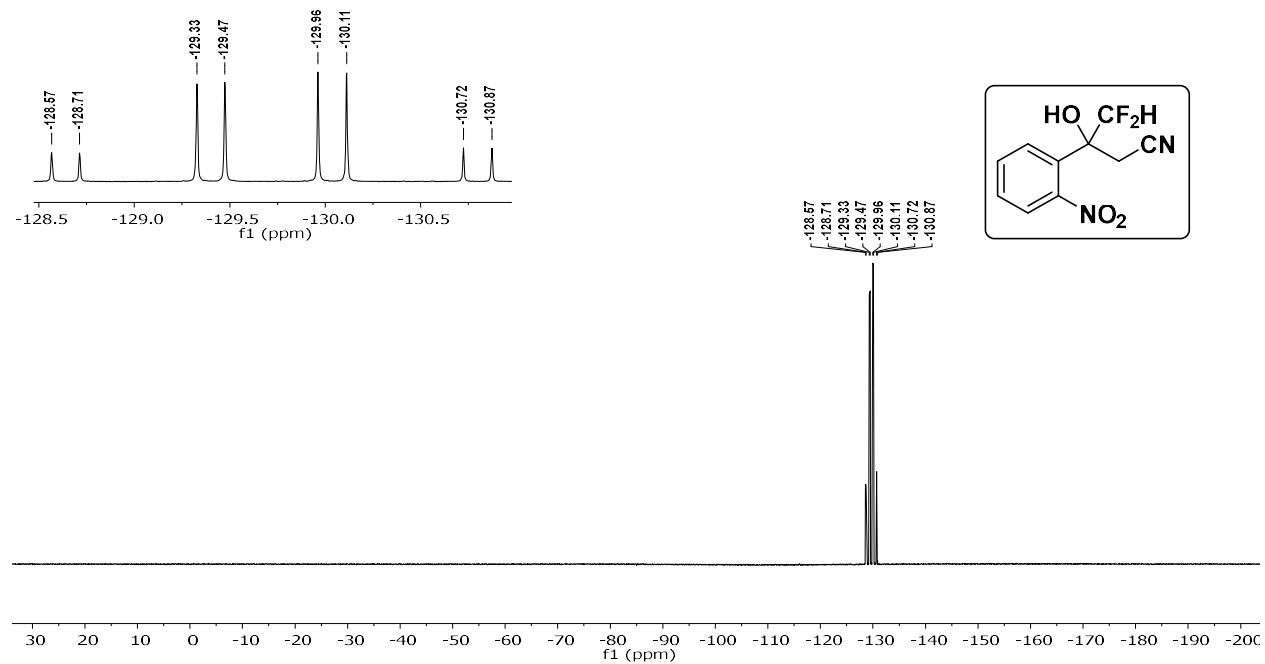

**<sup>1</sup>H NMR spectrum of 4,4-difluoro-3-(4-fluorophenyl)-3-hydroxybutanenitrile (5e).**

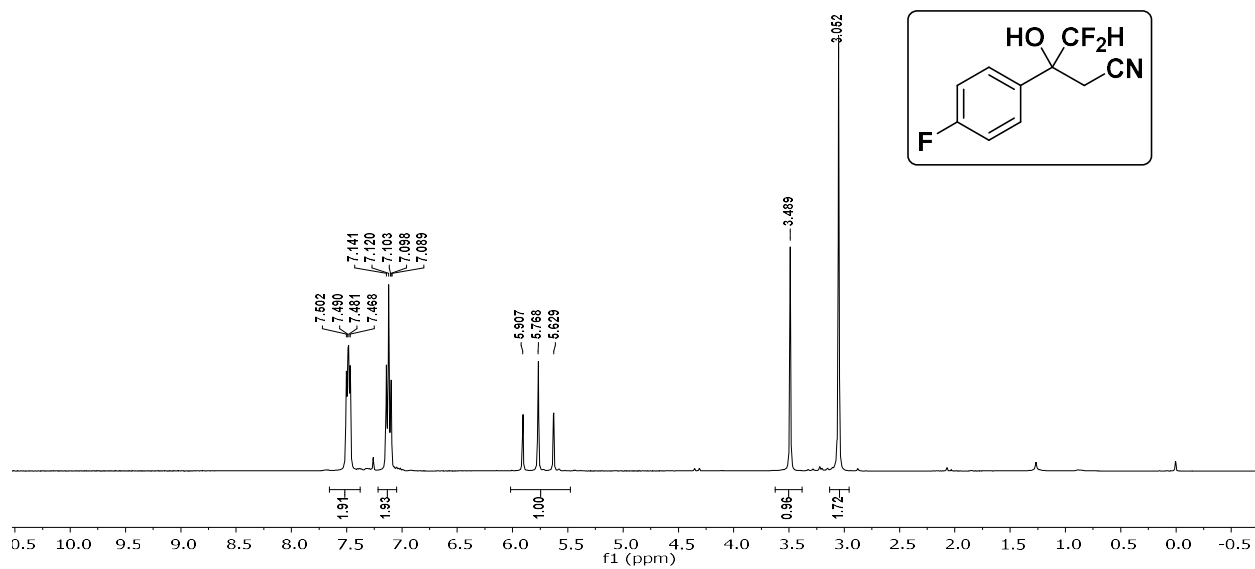

**<sup>13</sup>C NMR spectrum of 4,4-difluoro-3-(4-fluorophenyl)-3-hydroxybutanenitrile (5e).**

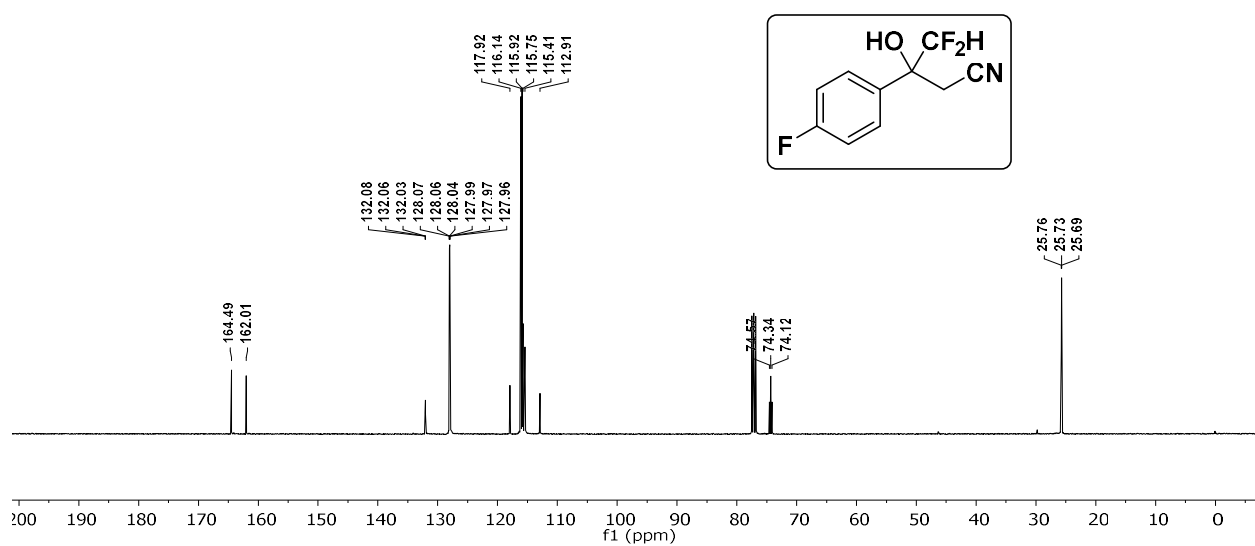

**$^{19}\text{F}$  NMR spectrum of 4,4-difluoro-3-(4-fluorophenyl)-3-hydroxybutanenitrile (5e).**

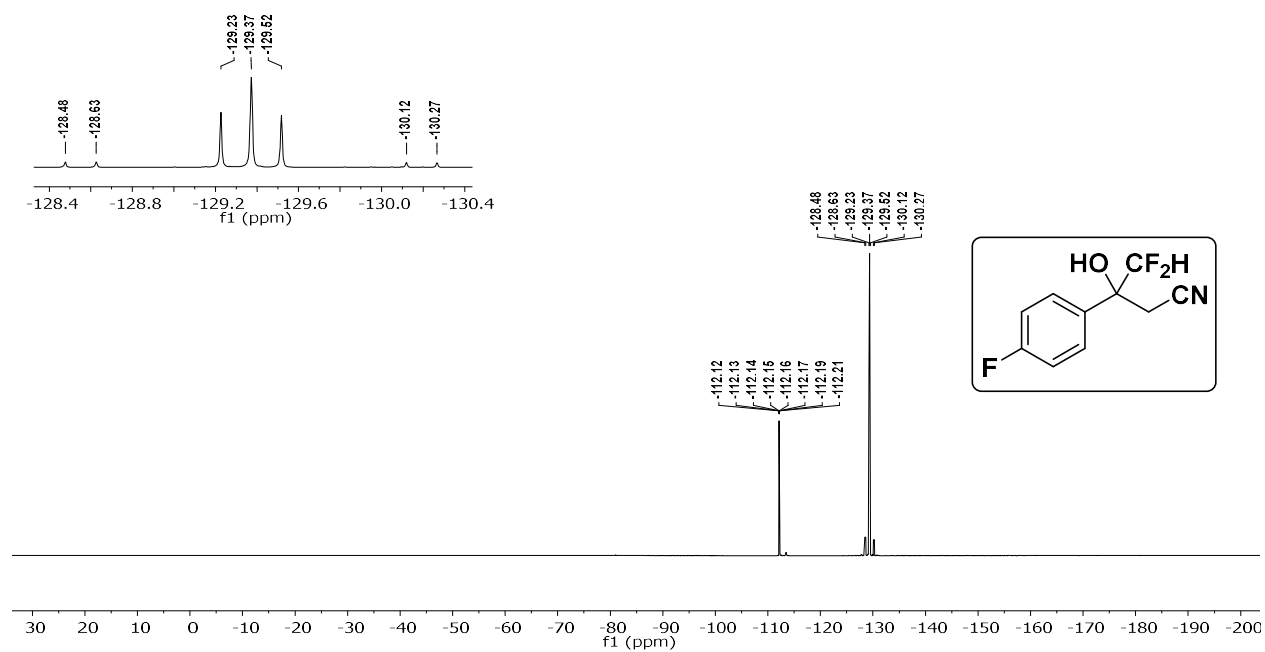

**$^1\text{H}$  NMR spectrum of 3-(4-chlorophenyl)-4,4-difluoro-3-hydroxybutanenitrile (5f).**

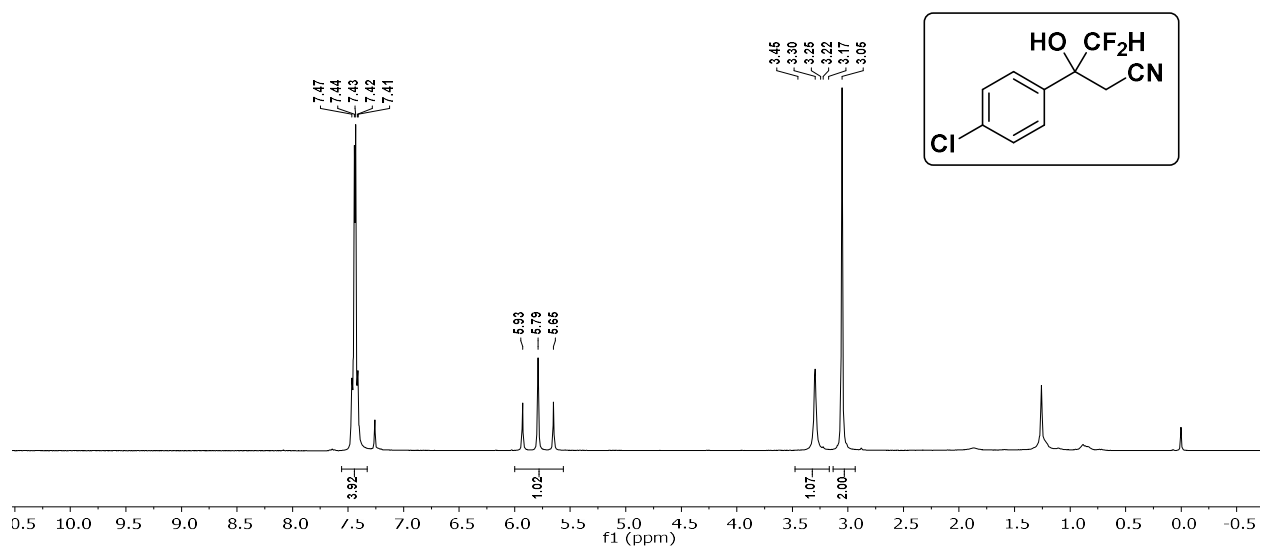

**$^{13}\text{C}$  NMR spectrum of 3-(4-chlorophenyl)-4,4-difluoro-3-hydroxybutanenitrile (5f).**

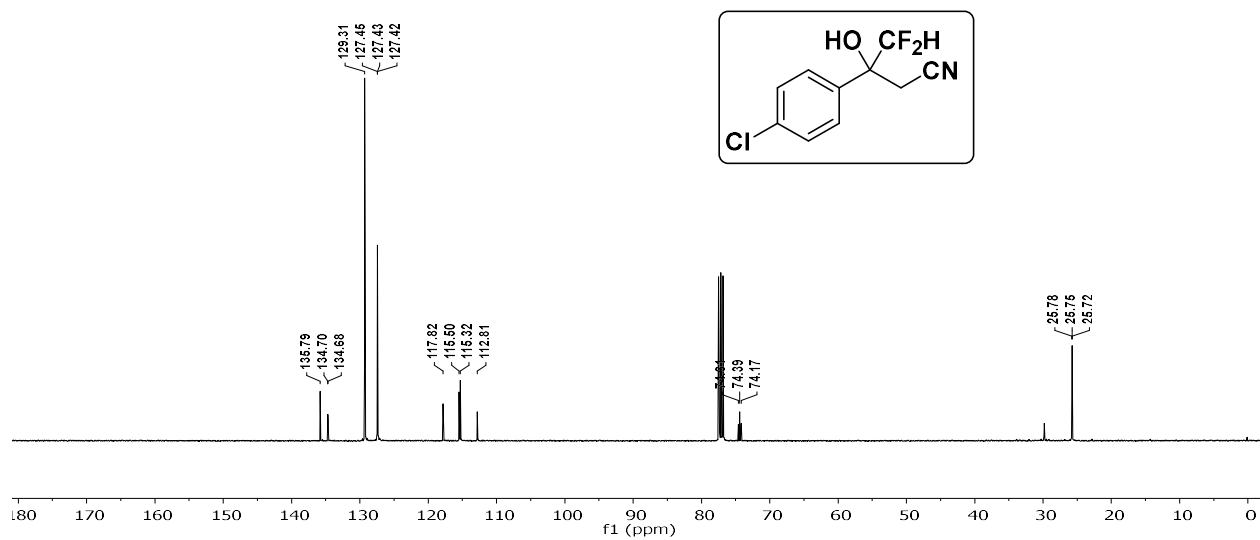

**$^{19}\text{F}$  NMR spectrum of 3-(4-chlorophenyl)-4,4-difluoro-3-hydroxybutanenitrile (5f).**

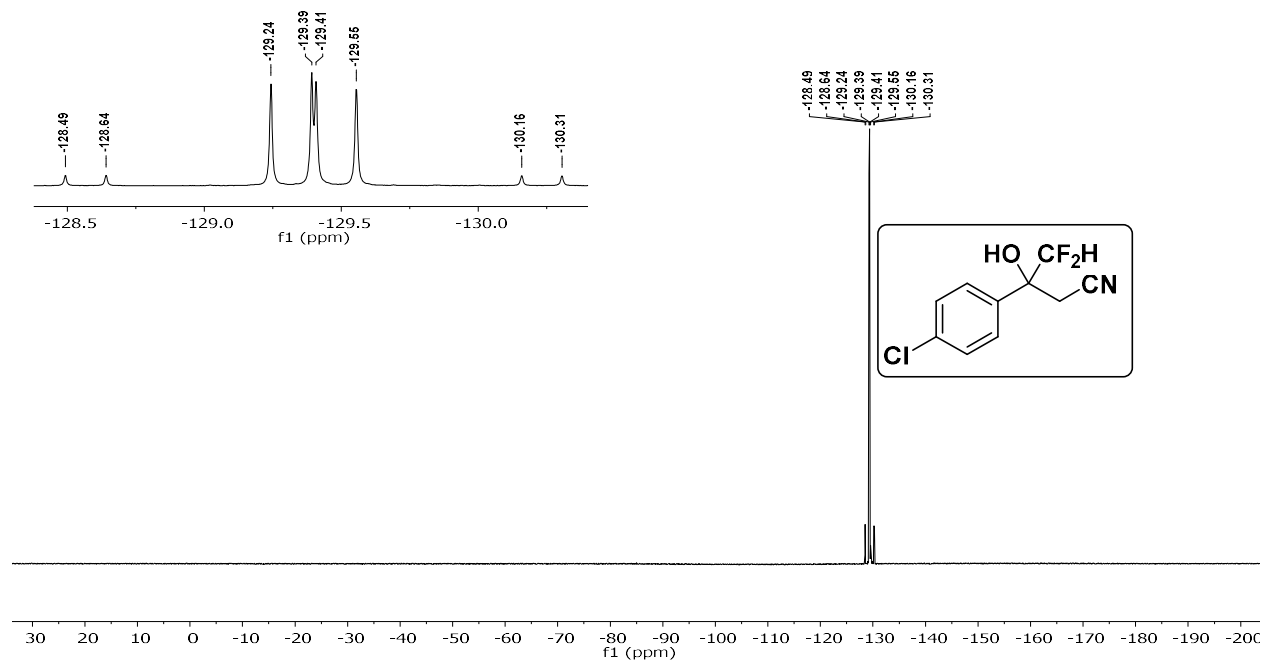

**<sup>1</sup>H NMR spectrum of 4,4-difluoro-3-(furan-2-yl)-3-hydroxybutanenitrile (5g).**

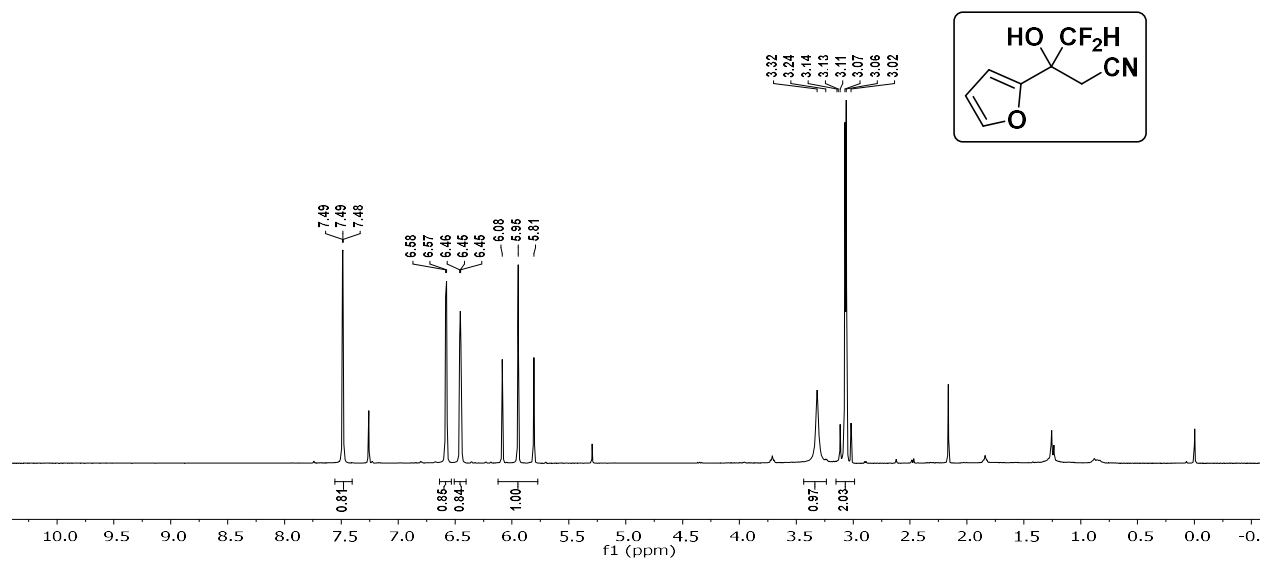

**<sup>13</sup>C NMR spectrum of 4,4-difluoro-3-(furan-2-yl)-3-hydroxybutanenitrile (5g).**

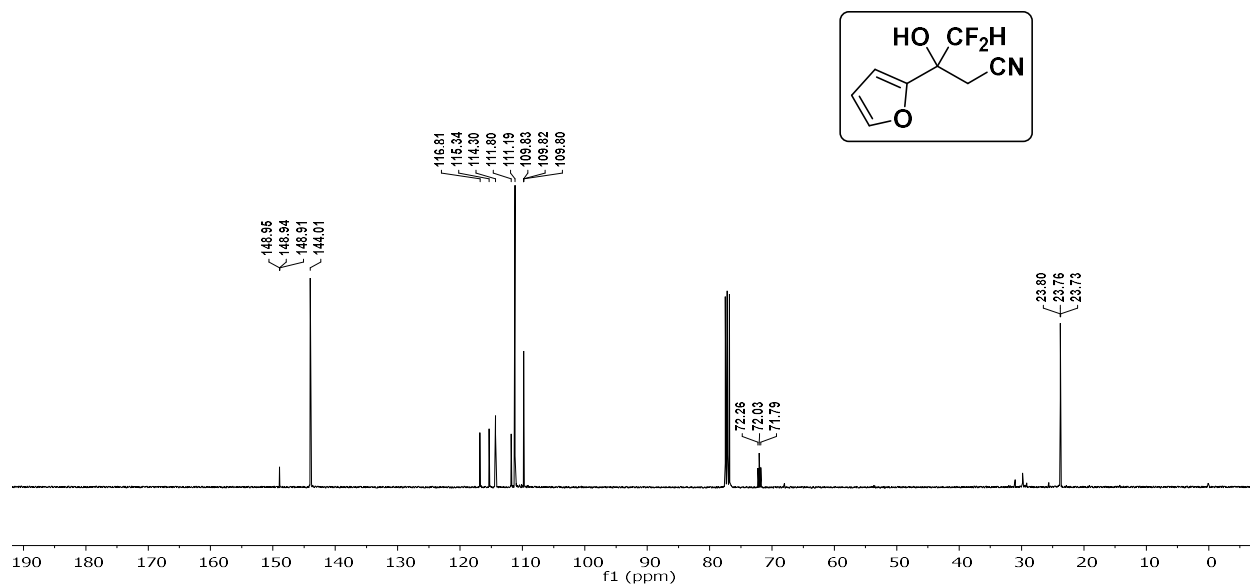



**$^{19}\text{F}$  NMR spectrum of 4,4-difluoro-3-(furan-2-yl)-3-hydroxybutanenitrile (5g).**

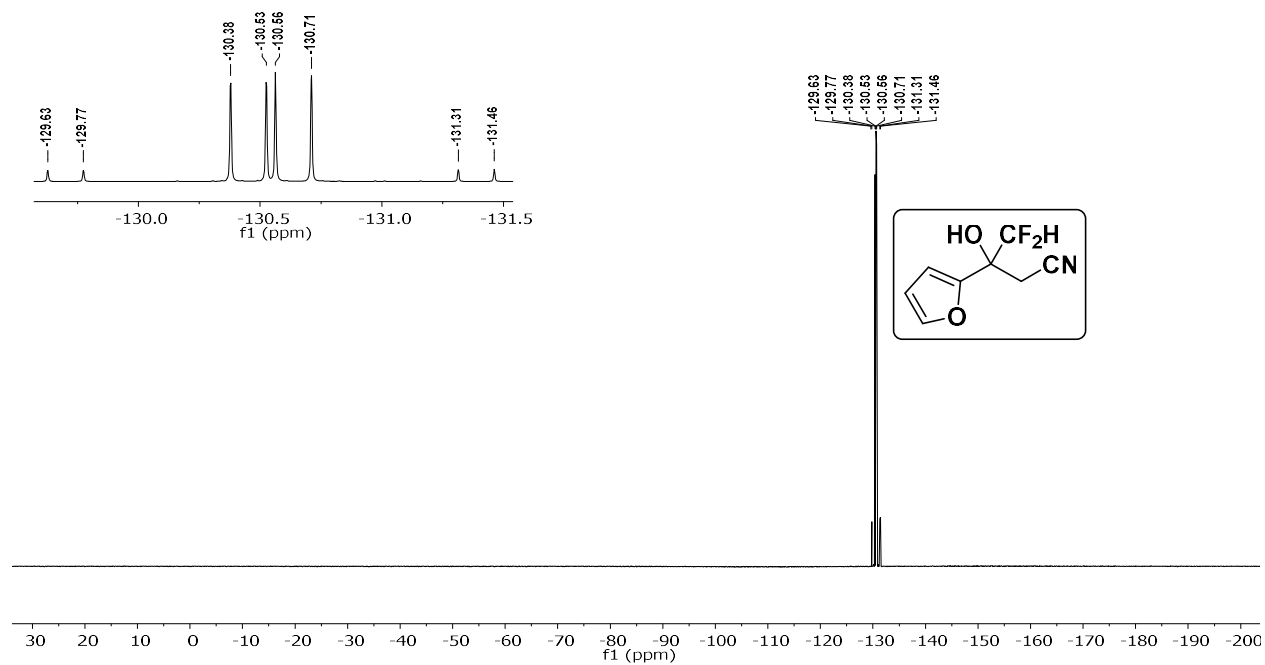

**$^1\text{H}$  NMR spectrum of 4,4-difluoro-3-hydroxy-3-(thiophen-2-yl)butanenitrile (5h).**

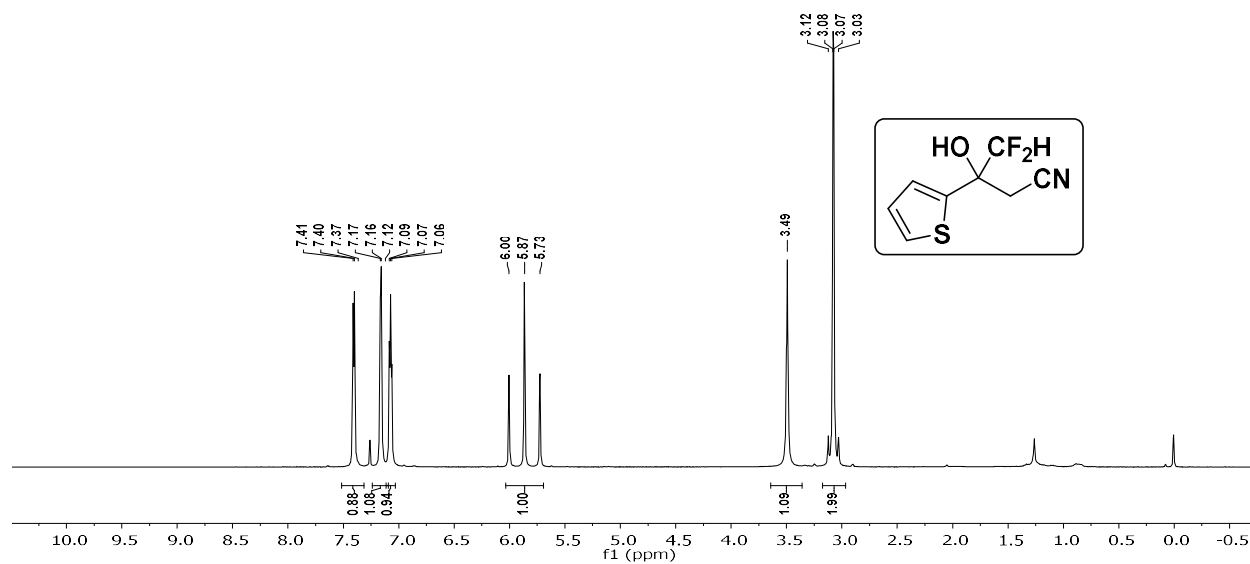

**<sup>13</sup>C NMR spectrum of 4,4-difluoro-3-hydroxy-3-(thiophen-2-yl)butanenitrile (5h).**

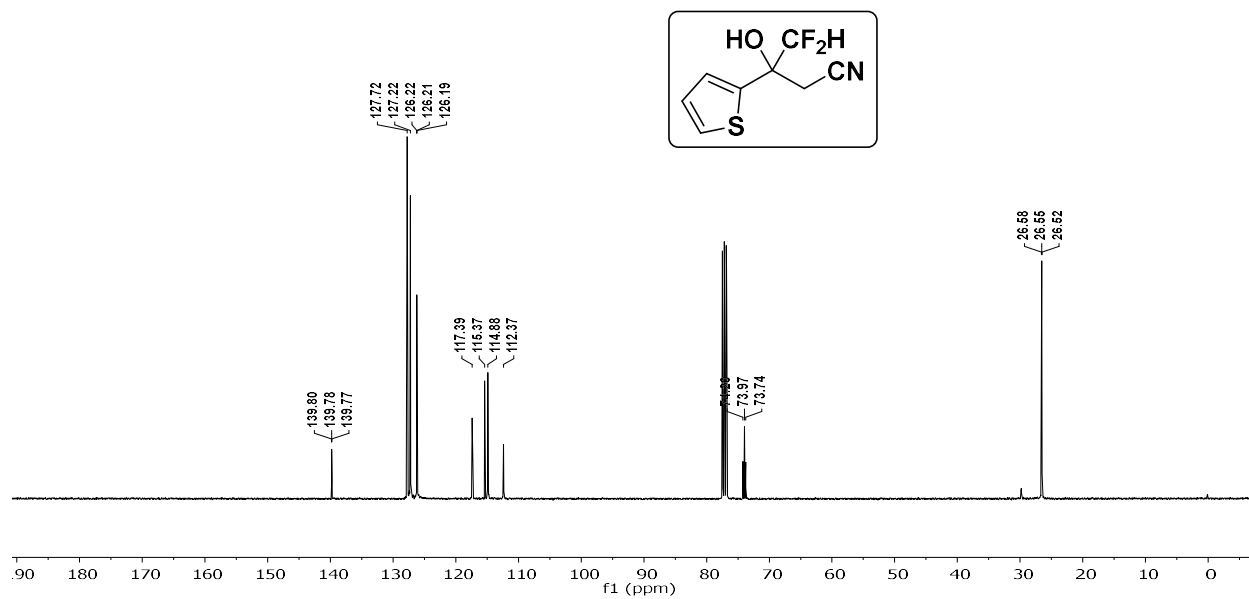

**<sup>19</sup>F NMR spectrum of 4,4-difluoro-3-hydroxy-3-(thiophen-2-yl)butanenitrile (5h).**

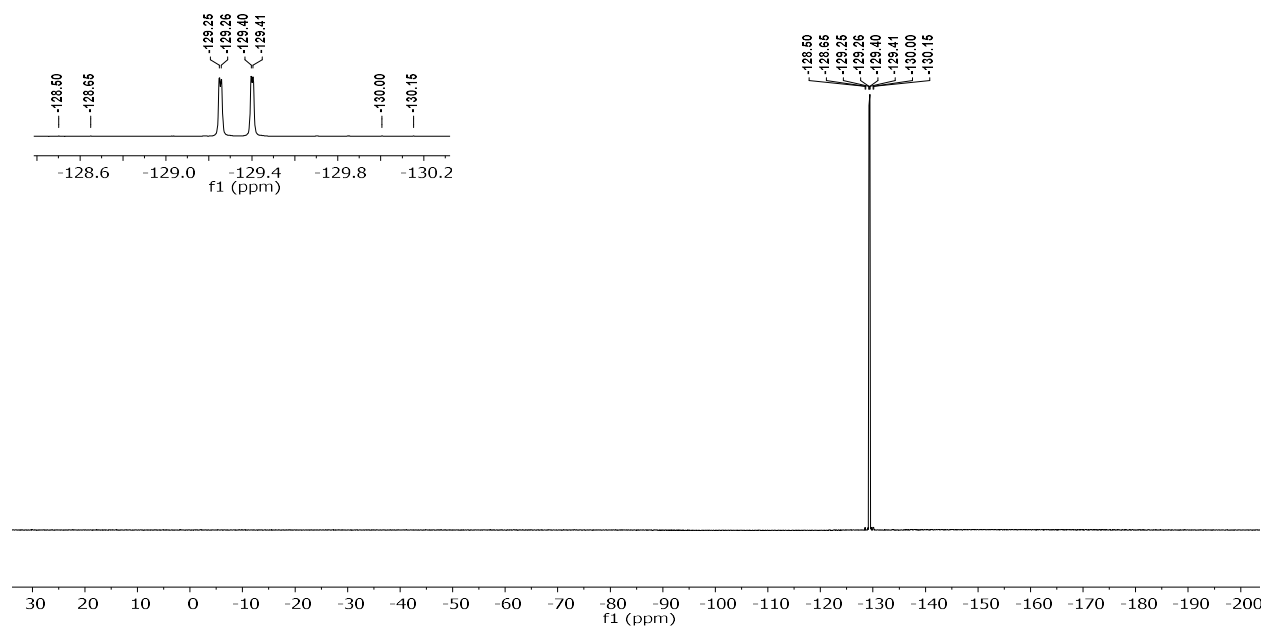

**<sup>1</sup>H NMR spectrum of 4-chloro-4,4-difluoro-3-hydroxy-3-phenylbutanenitrile (7).**

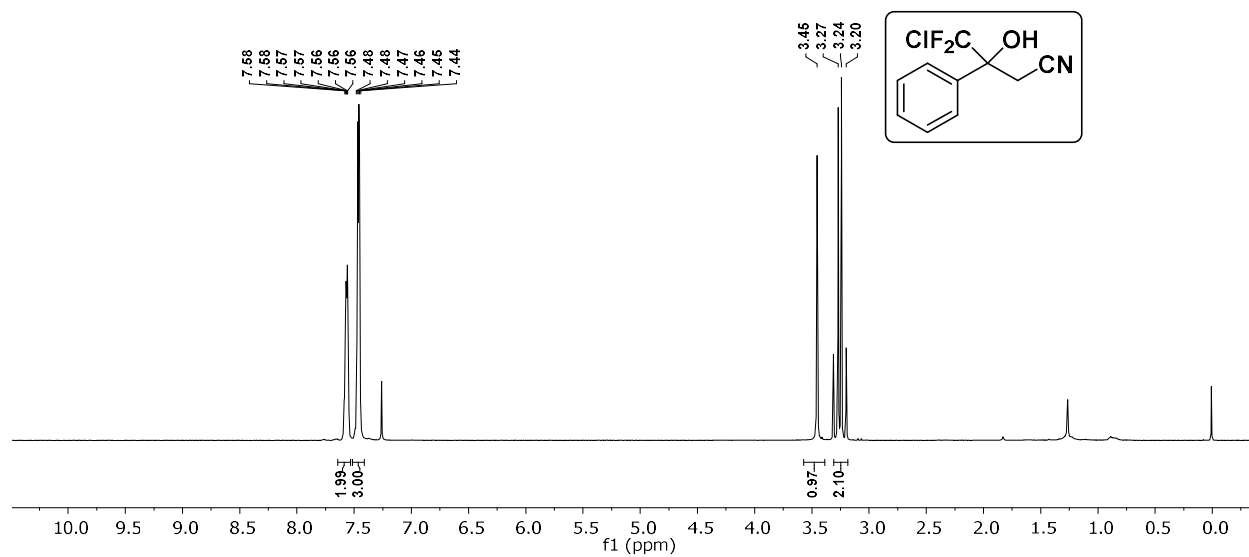

**<sup>13</sup>C NMR spectrum of 4-chloro-4,4-difluoro-3-hydroxy-3-phenylbutanenitrile (7).**

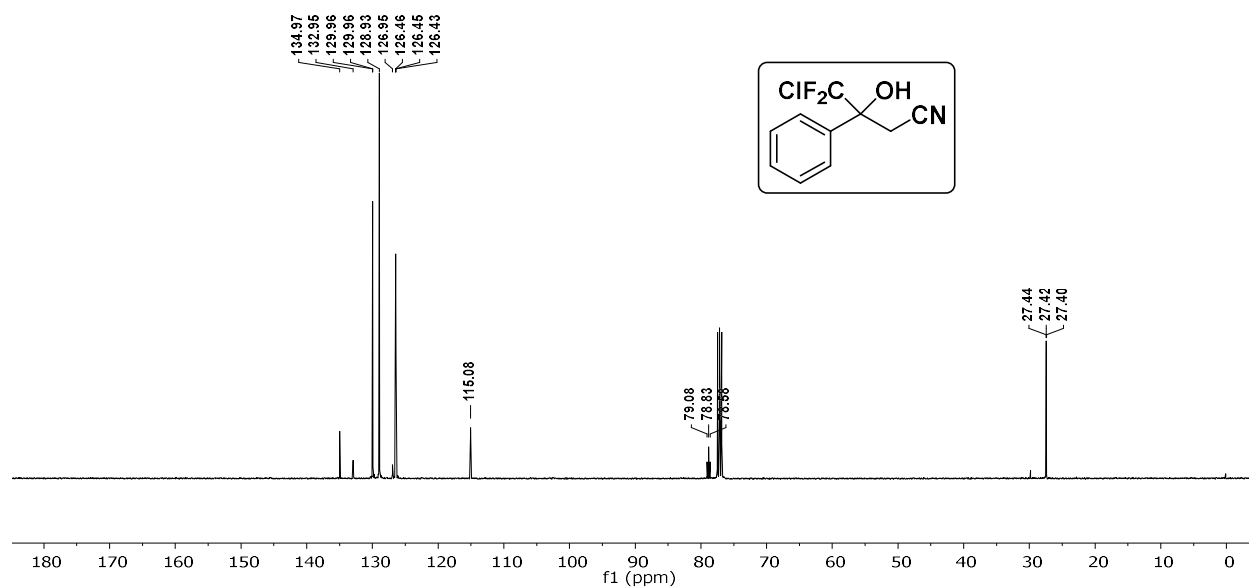

**$^{19}\text{F}$  NMR spectrum of 4-chloro-4,4-difluoro-3-hydroxy-3-phenylbutanenitrile (7).**

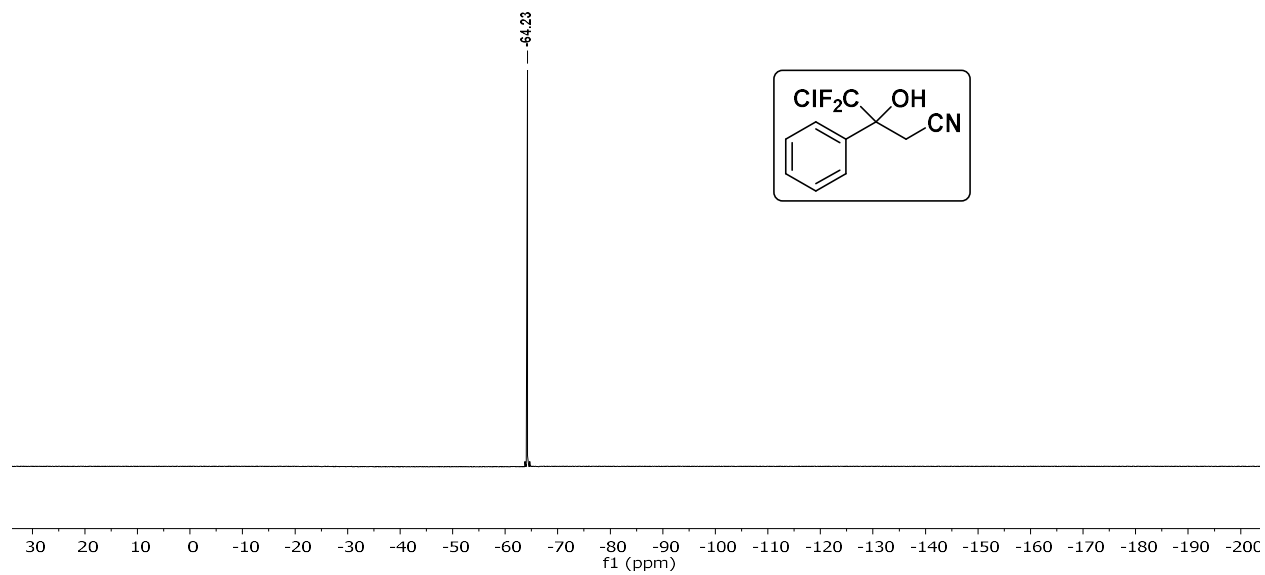

**$^1\text{H}$  NMR spectrum of (*R*)-*N*-(3-cyano-1,1-difluoro-2-(naphthalen-2-yl)propan-2-yl)-2-methylpropane-2-sulfinamide (9).**

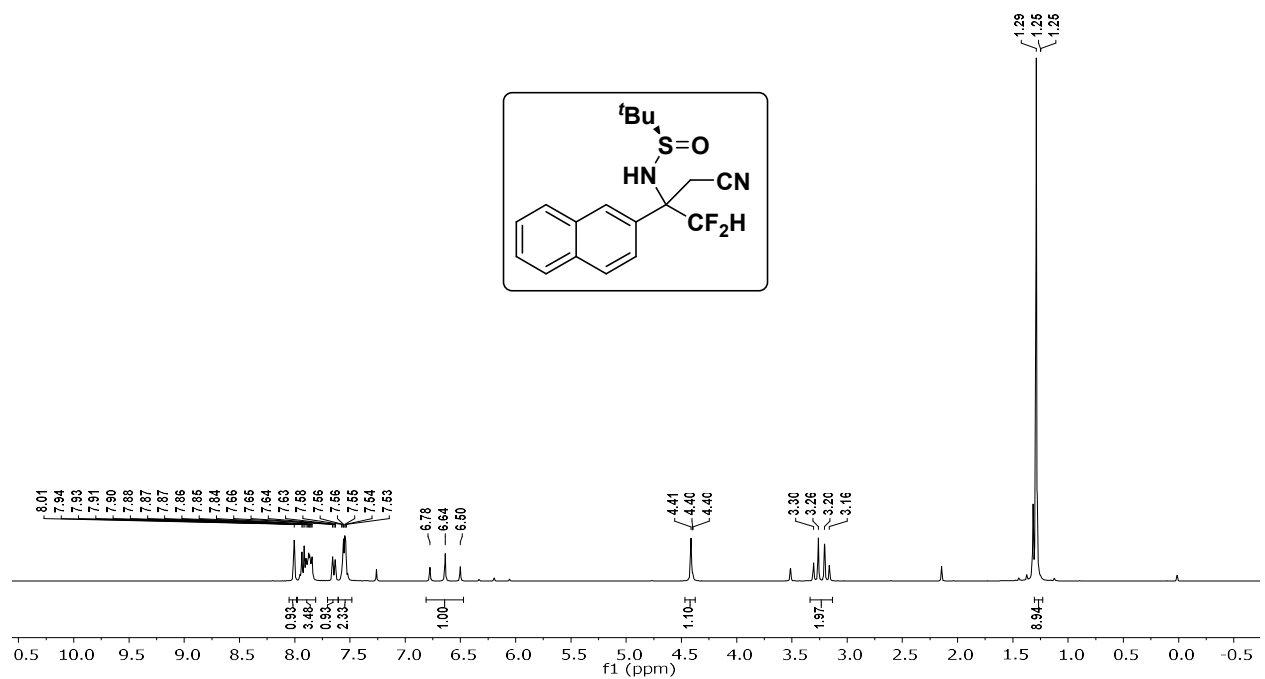

**$^{13}\text{C}$  NMR spectrum of (*R*)-*N*-(3-cyano-1,1-difluoro-2-(naphthalen-2-yl)propan-2-yl)-2-methylpropane-2-sulfinamide (9).**

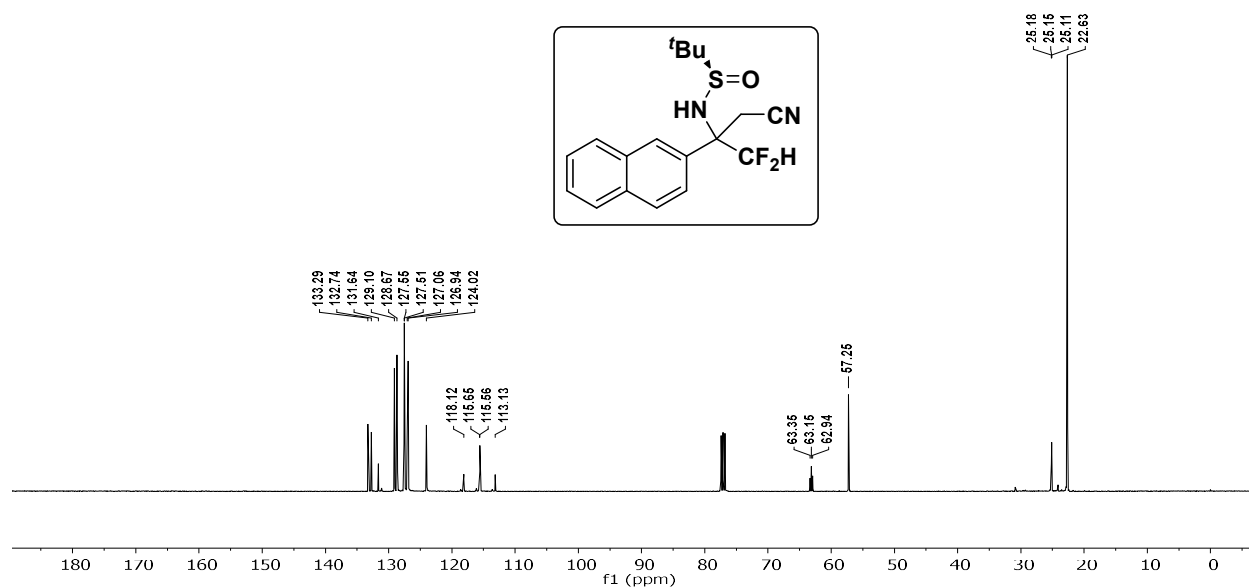

**$^{19}\text{F}$  NMR spectrum of (*R*)-*N*-(3-cyano-1,1-difluoro-2-(naphthalen-2-yl)propan-2-yl)-2-methylpropane-2-sulfinamide (9).**

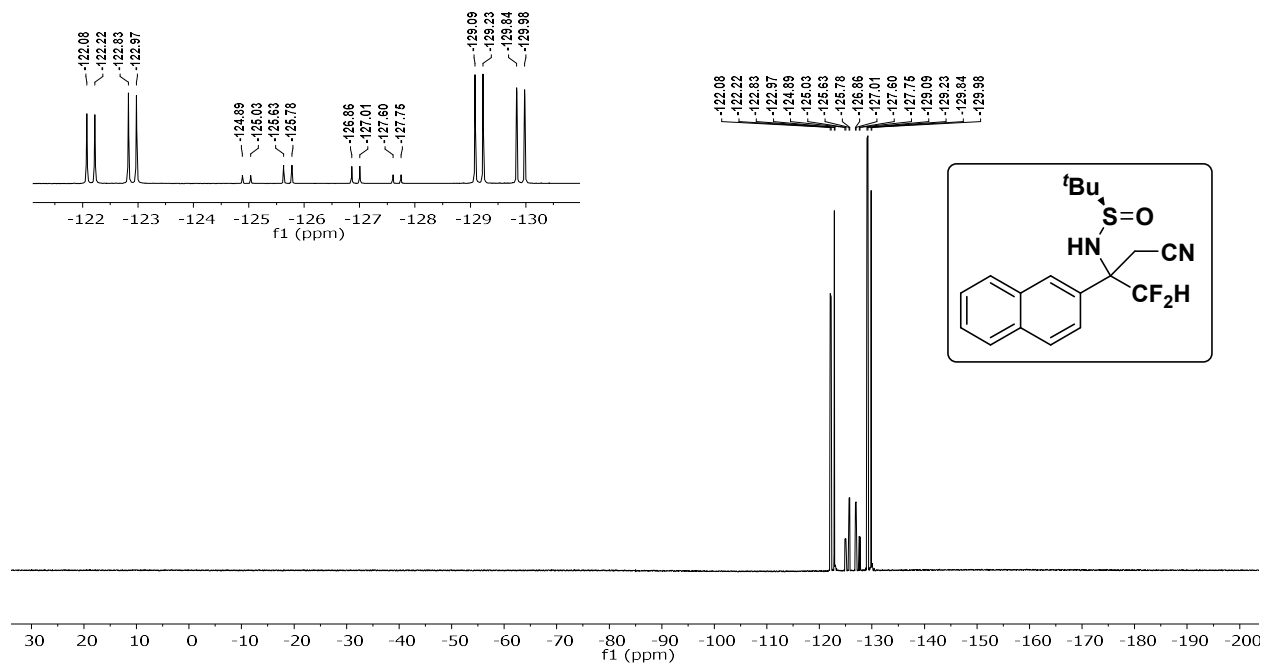

## 5. Crystallographic data

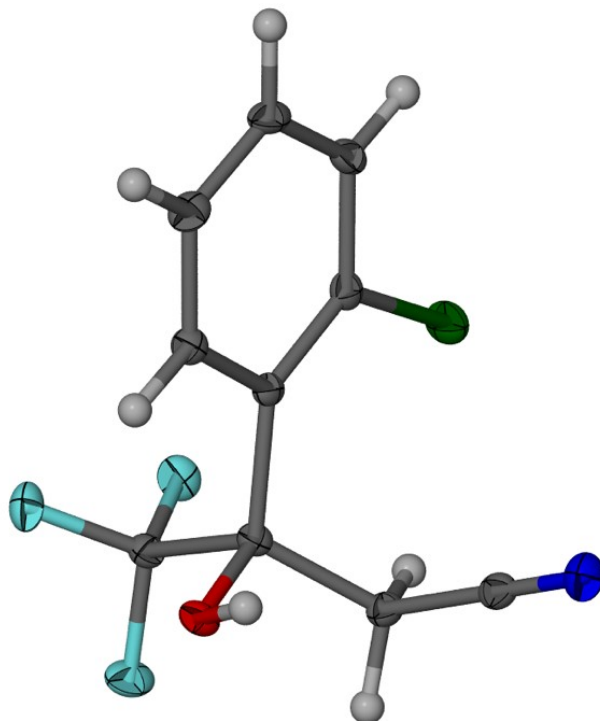

### 3-(2-Chlorophenyl)-4,4,4-trifluoro-3-hydroxybutanenitrile (3d)

A single crystal was obtained by slow evaporation of a solution containing the chiral alcohol in a mixture of hexanes and ethyl acetate (4:1). Single crystal X-ray analysis was performed at 100 K using a Siemens platform diffractometer with graphite monochromated Mo-K $\alpha$  radiation ( $\lambda = 0.71073 \text{ \AA}$ ). Data were integrated and corrected using the Apex 3 program. The structures were solved by direct methods and refined with full-matrix least-square analysis using SHELX-97-2 software. Non-hydrogen atoms were refined with anisotropic displacement parameter. Crystal data: C<sub>10</sub>H<sub>7</sub>ClF<sub>3</sub>NO,  $M = 249.02$ , colorless block,  $0.63 \times 0.44 \times 0.38 \text{ mm}^3$ , orthorhombic, space group  $Pccn = 12.2156(19)$ ,  $b = 23.4862(12)$ ,  $c = 7.1398(4) \text{ \AA}$ ,  $V = 2048.40(19) \text{ \AA}^3$ ,  $Z = 8$ .

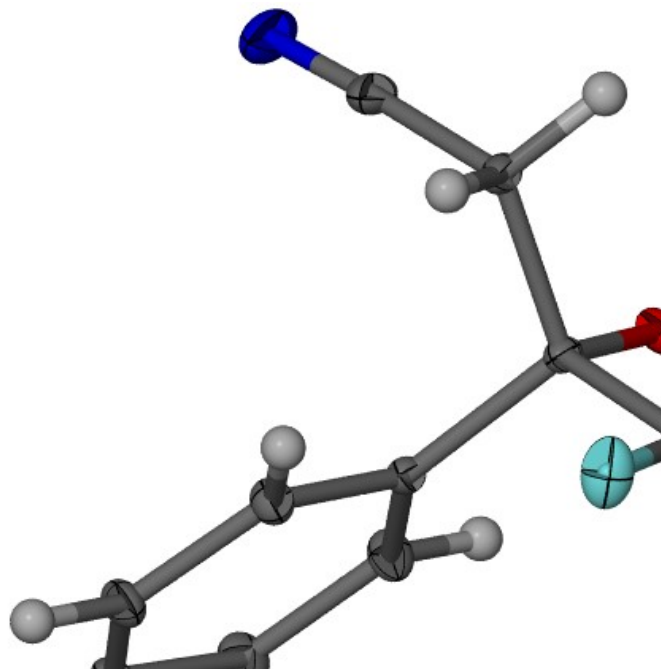

**4,4,4-Trifluoro-3-(4-fluorophenyl)-3-hydroxybutanenitrile (3e)**

A single crystal was obtained by slow evaporation of a solution containing the chiral alcohol in a mixture of hexanes and ethyl acetate (4:1). Single crystal X-ray analysis was performed at 100 K using a Siemens platform diffractometer with graphite monochromated Mo-K $\alpha$  radiation ( $\lambda = 0.71073$  Å). Data were integrated and corrected using the Apex 3 program. The structures were solved by direct methods and refined with full-matrix least-square analysis using SHELX-97-2 software. Non-hydrogen atoms were refined with anisotropic displacement parameter. Crystal data: C<sub>10</sub>H<sub>7</sub>F<sub>4</sub>NO,  $M = 233.05$ , colorless needle, 0.49 x 0.12 x 0.12 mm<sup>3</sup>, triclinic, space group *P*-1  $a = 9.0187(9)$ ,  $b = 10.7542(11)$ ,  $c = 21.489(2)$  Å,  $V = 1973.9(3)$  Å<sup>3</sup>,  $Z = 8$ .



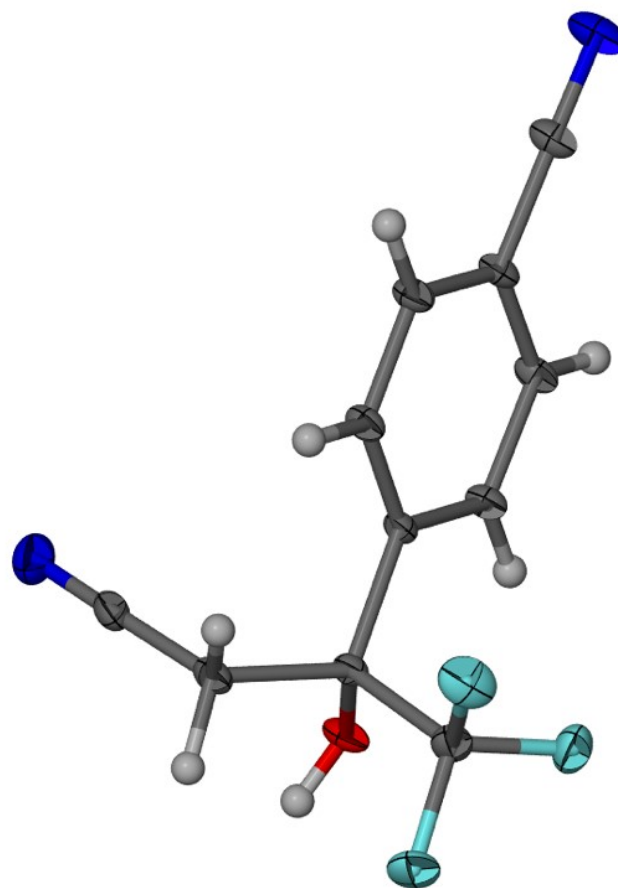

**4-(3-Cyano-1,1,1-trifluoro-2-hydroxypropan-2-yl)benzonitrile (3h)**

A single crystal was obtained by slow evaporation of a solution containing the chiral alcohol in a mixture of hexanes and ethyl acetate (1:1). Single crystal X-ray analysis was performed at 100 K using a Siemens platform diffractometer with graphite monochromated Mo-K $\alpha$  radiation ( $\lambda = 0.71073 \text{ \AA}$ ). Data were integrated and corrected using the Apex 3 program. The structures were solved by direct methods and refined with full-matrix least-square analysis using SHELX-97-2 software. Non-hydrogen atoms were refined with anisotropic displacement parameter. Crystal data: C<sub>11</sub>H<sub>7</sub>F<sub>3</sub>N<sub>2</sub>O,  $M = 240.05$ , colorless prism, 0.35 x 0.25 x 0.18 mm<sup>3</sup>, monoclinic, space group  $P2_1/c$ ,  $a = 10.8248(11)$ ,  $b = 9.7905(10)$ ,  $c = 10.1948(10) \text{ \AA}$ ,  $V = 1071.91(19) \text{ \AA}^3$ ,  $Z = 4$ .

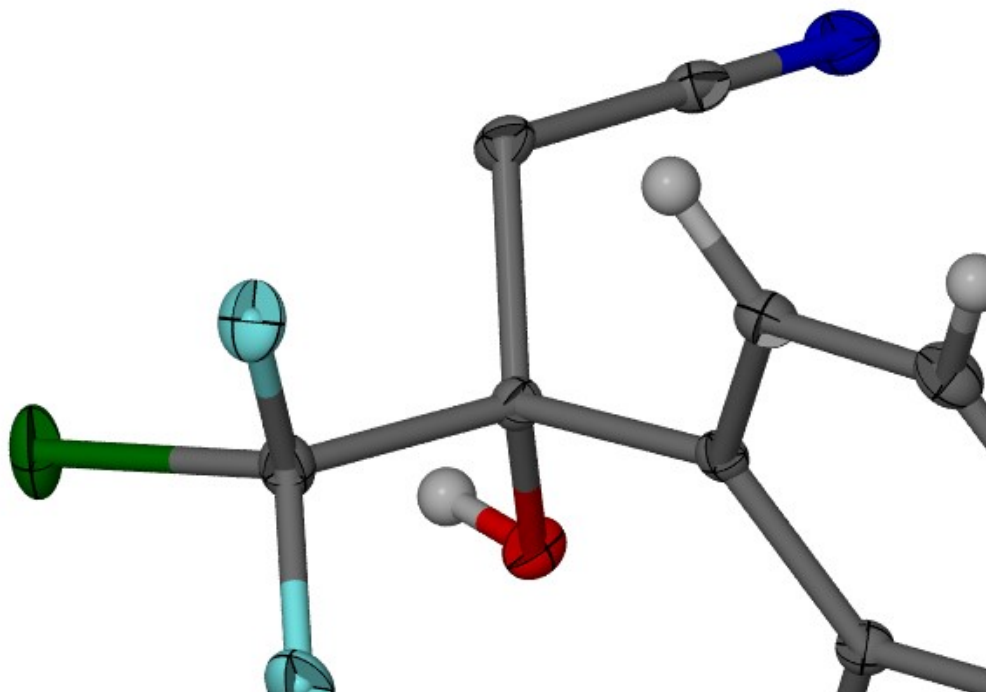

#### **4-Chloro-4,4-difluoro-3-hydroxy-3-phenylbutanenitrile (7)**

A single crystal was obtained by slow evaporation of a solution containing the chiral alcohol in a mixture of hexanes and ethyl acetate (4:1). Single crystal X-ray analysis was performed at 100 K using a Siemens platform diffractometer with graphite monochromated Mo-K $\alpha$  radiation ( $\lambda = 0.71073 \text{ \AA}$ ). Data were integrated and corrected using the Apex 3 program. The structures were solved by direct methods and refined with full-matrix least-square analysis using SHELX-97-2 software. Non-hydrogen atoms were refined with anisotropic displacement parameter. Crystal data: C<sub>10</sub>H<sub>8</sub>ClF<sub>2</sub>NO,  $M = 231.03$ , colorless prism,  $0.89 \times 0.73 \times 0.52 \text{ mm}^3$ , triclinic, space group  $P-1$ ,  $a = 6.2345(3)$ ,  $b = 12.8524(6)$ ,  $c = 13.8297(6) \text{ \AA}$ ,  $V = 99.734(8) \text{ \AA}^3$ ,  $Z = 4$ .

## 6. References

- (1) (a) D. J. Leng, C. M. Black, G. Pattison, *Org. Biomol. Chem.* **2016**, *14*, 1531-1535. (b) K. Balaraman, C. Wolf, *Angew. Chem. Int. Ed.* **2017**, *56*, 1390-1395.
- (2) (a) W. Hua, Z. Xiaoming, L. Youhua, L. Long, *Org. Lett.* **2006**, *8*, 1379-1381. (b) G. Tao, S. Ran, Y. Bin-Hua, C. Xiao-Yang, S. Xing-Wen, L. Guo-Qiang, *Chem. Commun.*, **2013**, *49*, 5402-5404. (c) Y. Wenchao, Z. Laijun, N. Chuanfa, R. Jian, H. Jinbo, *Chem. Commun.*, **2014**, *50*, 10596-10599.
- (3) M. Makosza, P. Nieczypor, K. Grela, *Tetrahedron: Asymm.* **1998**, *54*, 10827-10836.
